# Supplementary material
Source: publisher figshare collection journal article supplement (https://tandf.figshare.com/ndownloader/files/17479715)
Supplement: Supplementary file 1 [file 17479715]

Blackbird


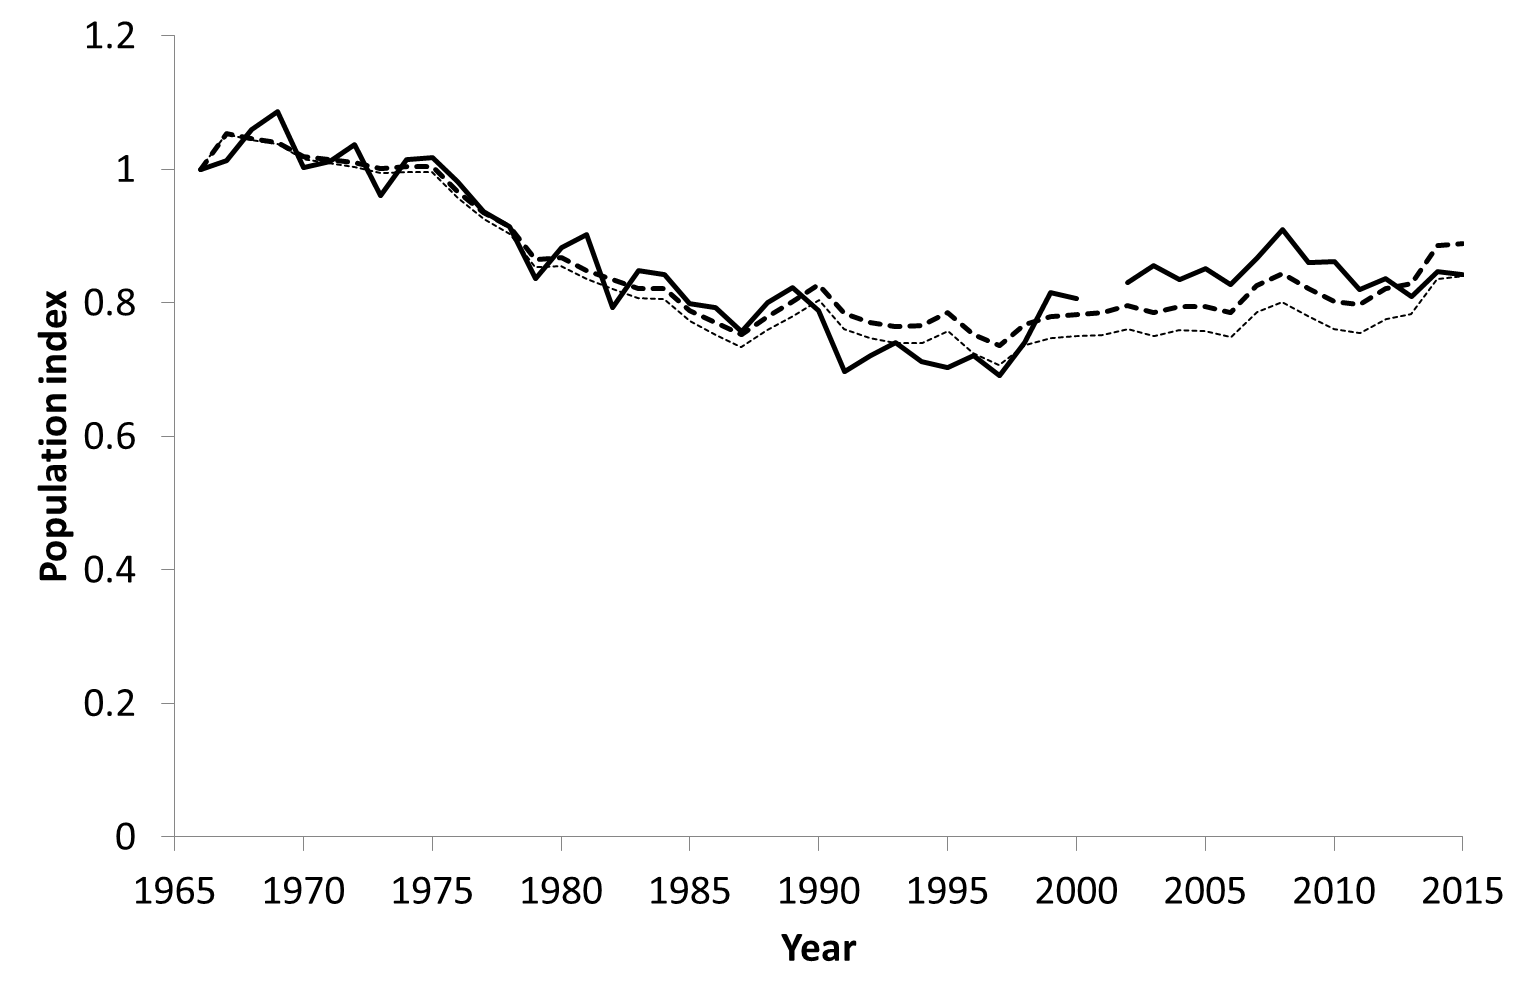


Blackcap


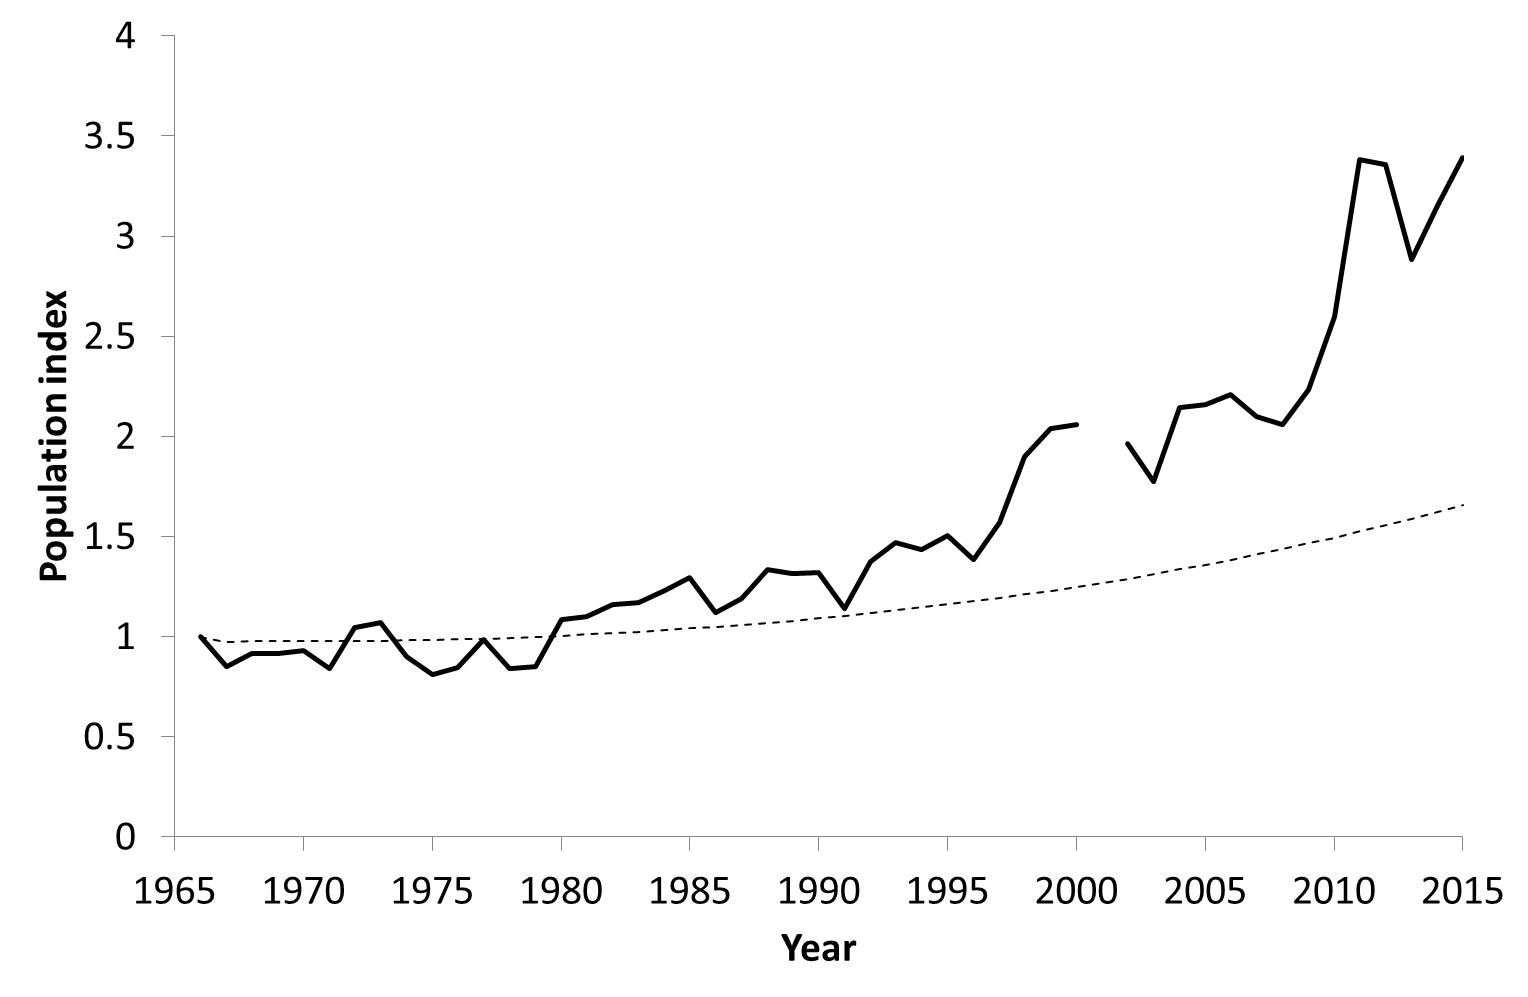


Blue tit


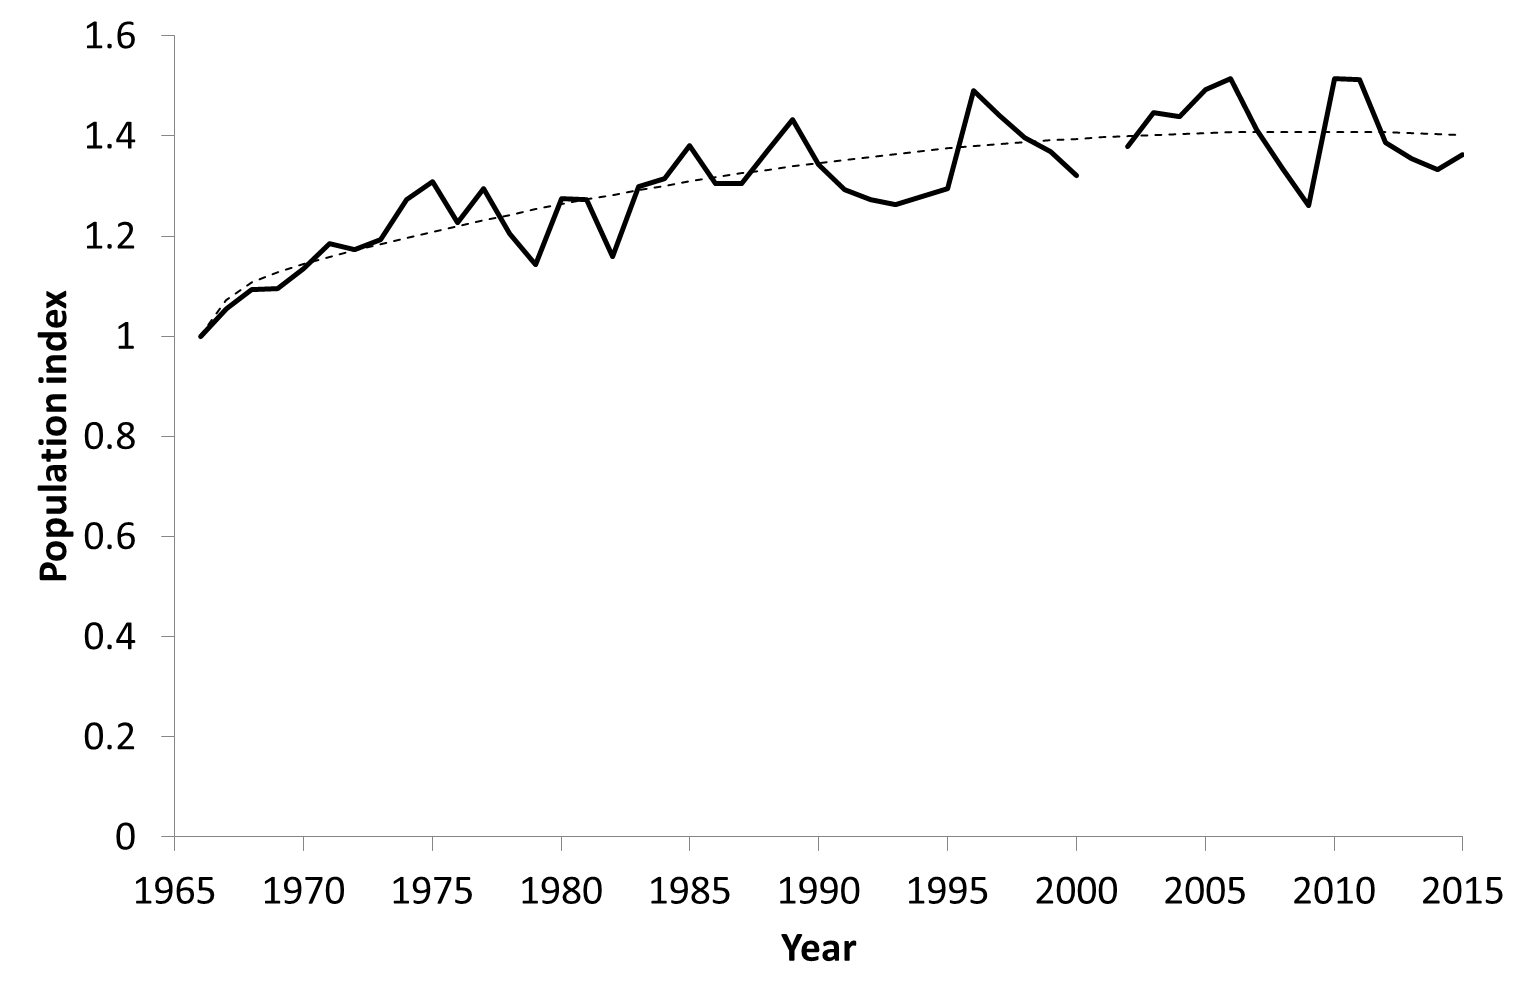


Bullfinch


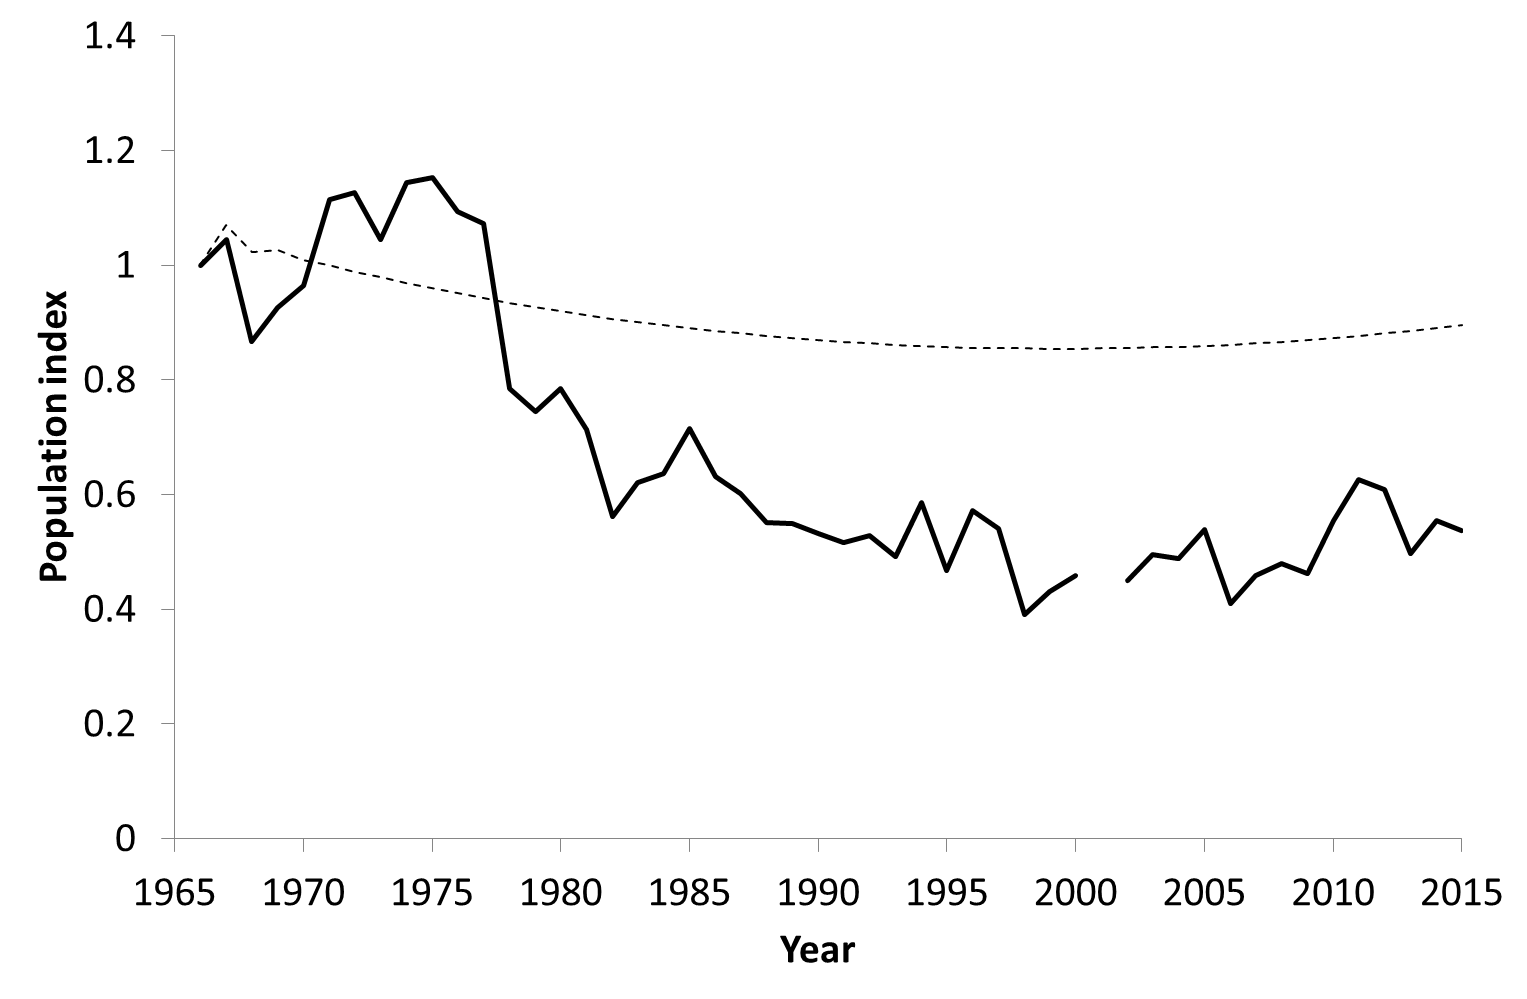


Buzzard


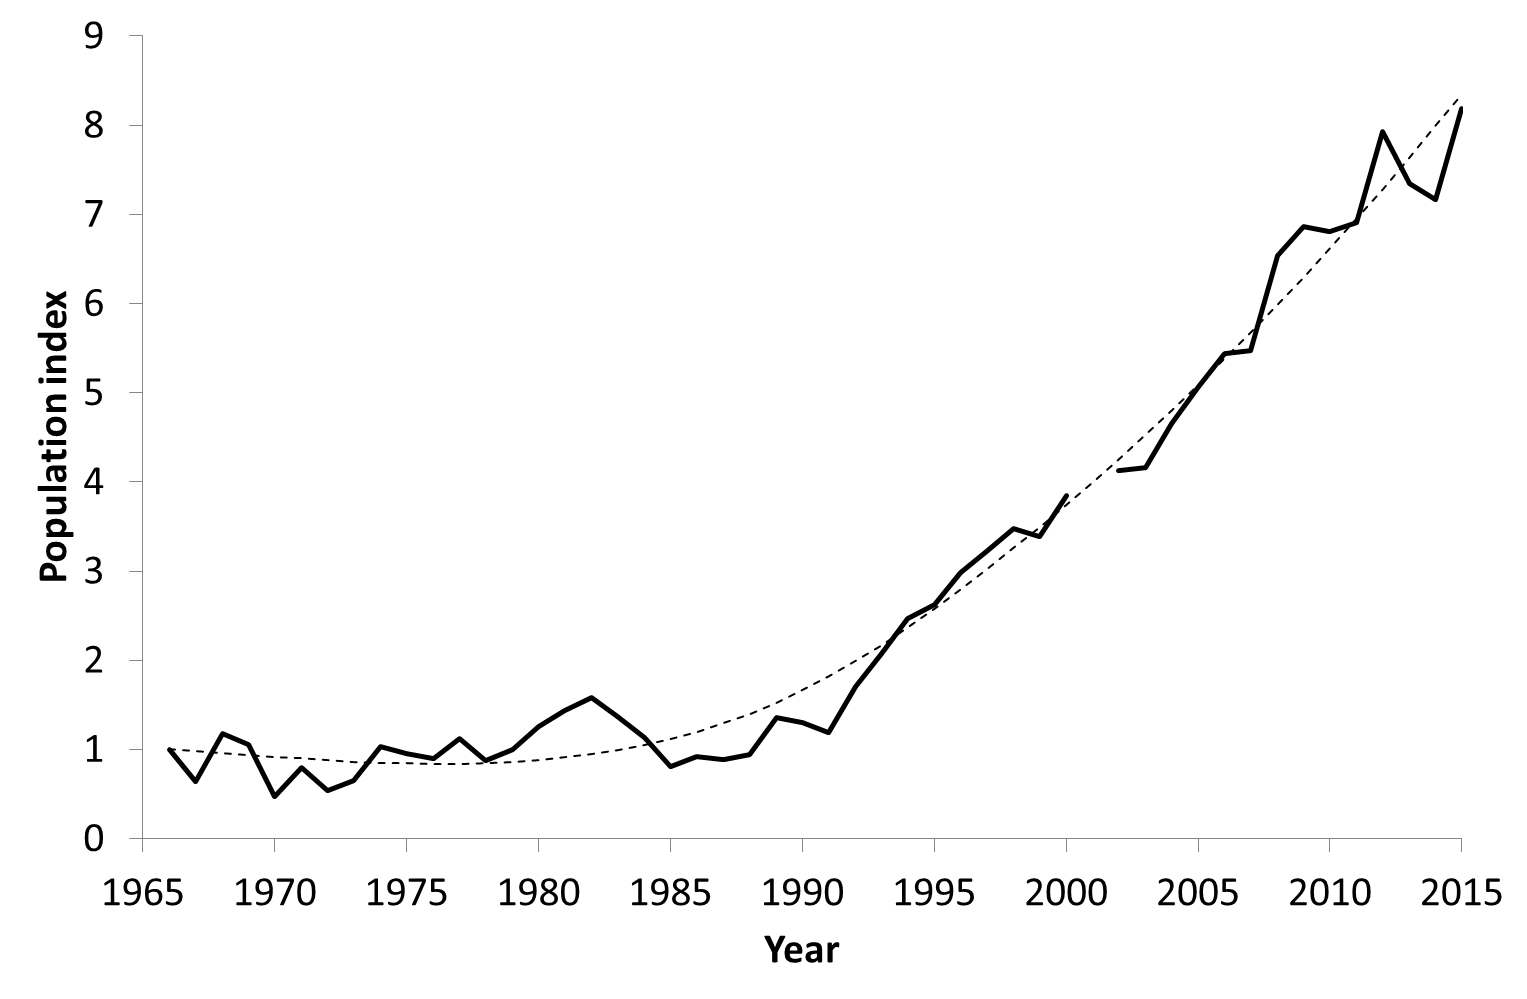


Carrion crow


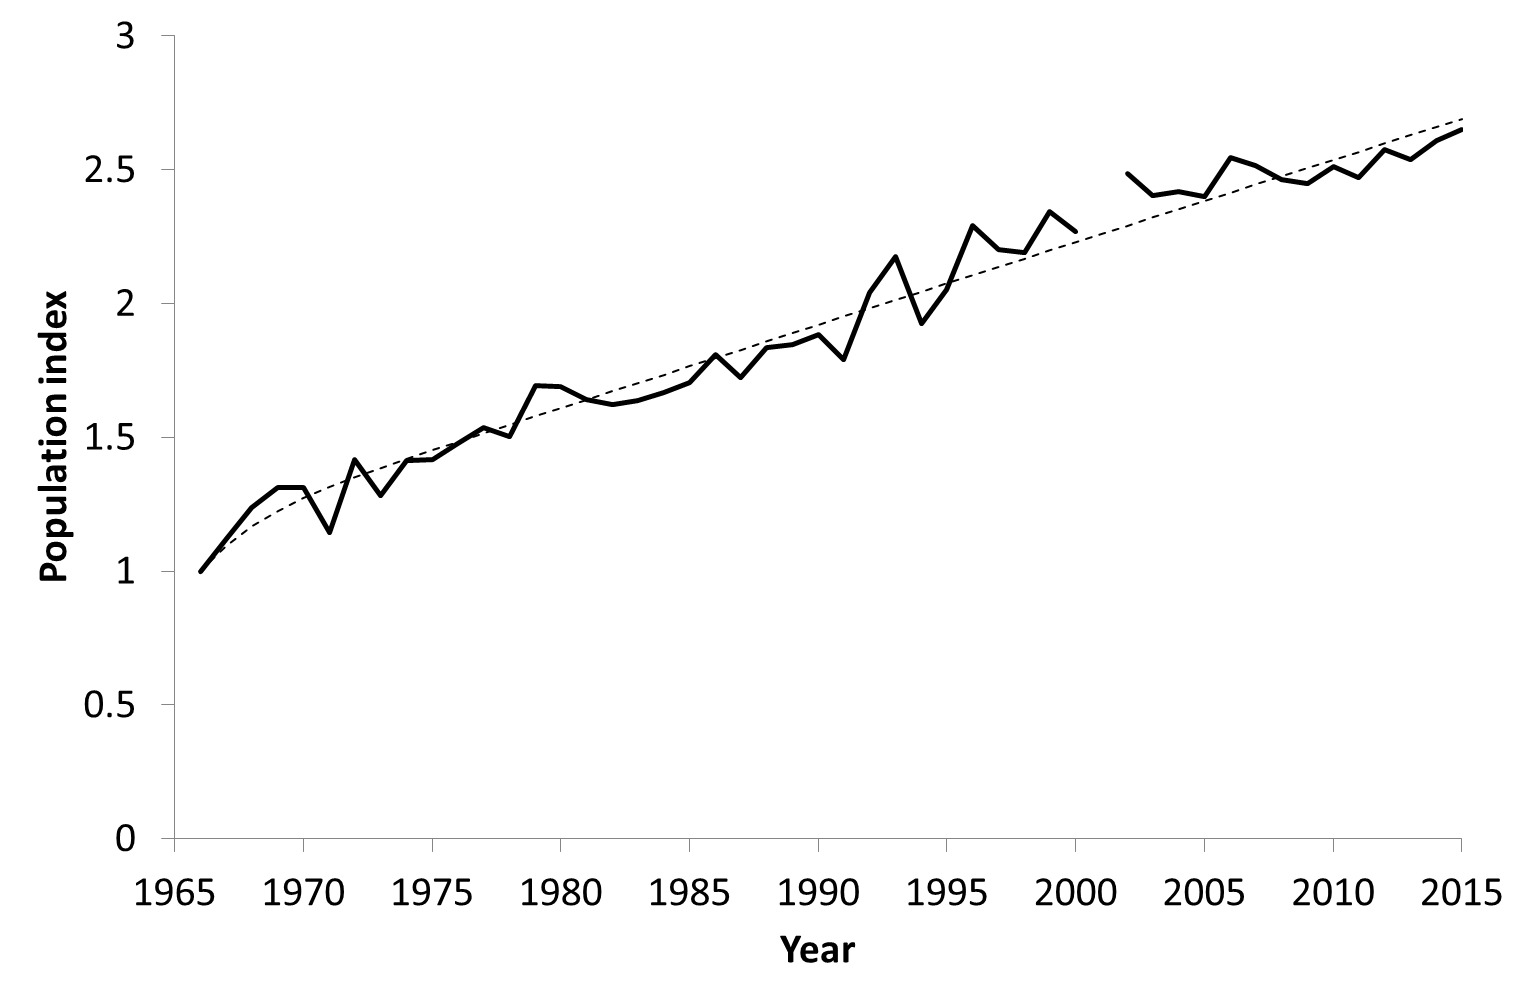


Chaffinch


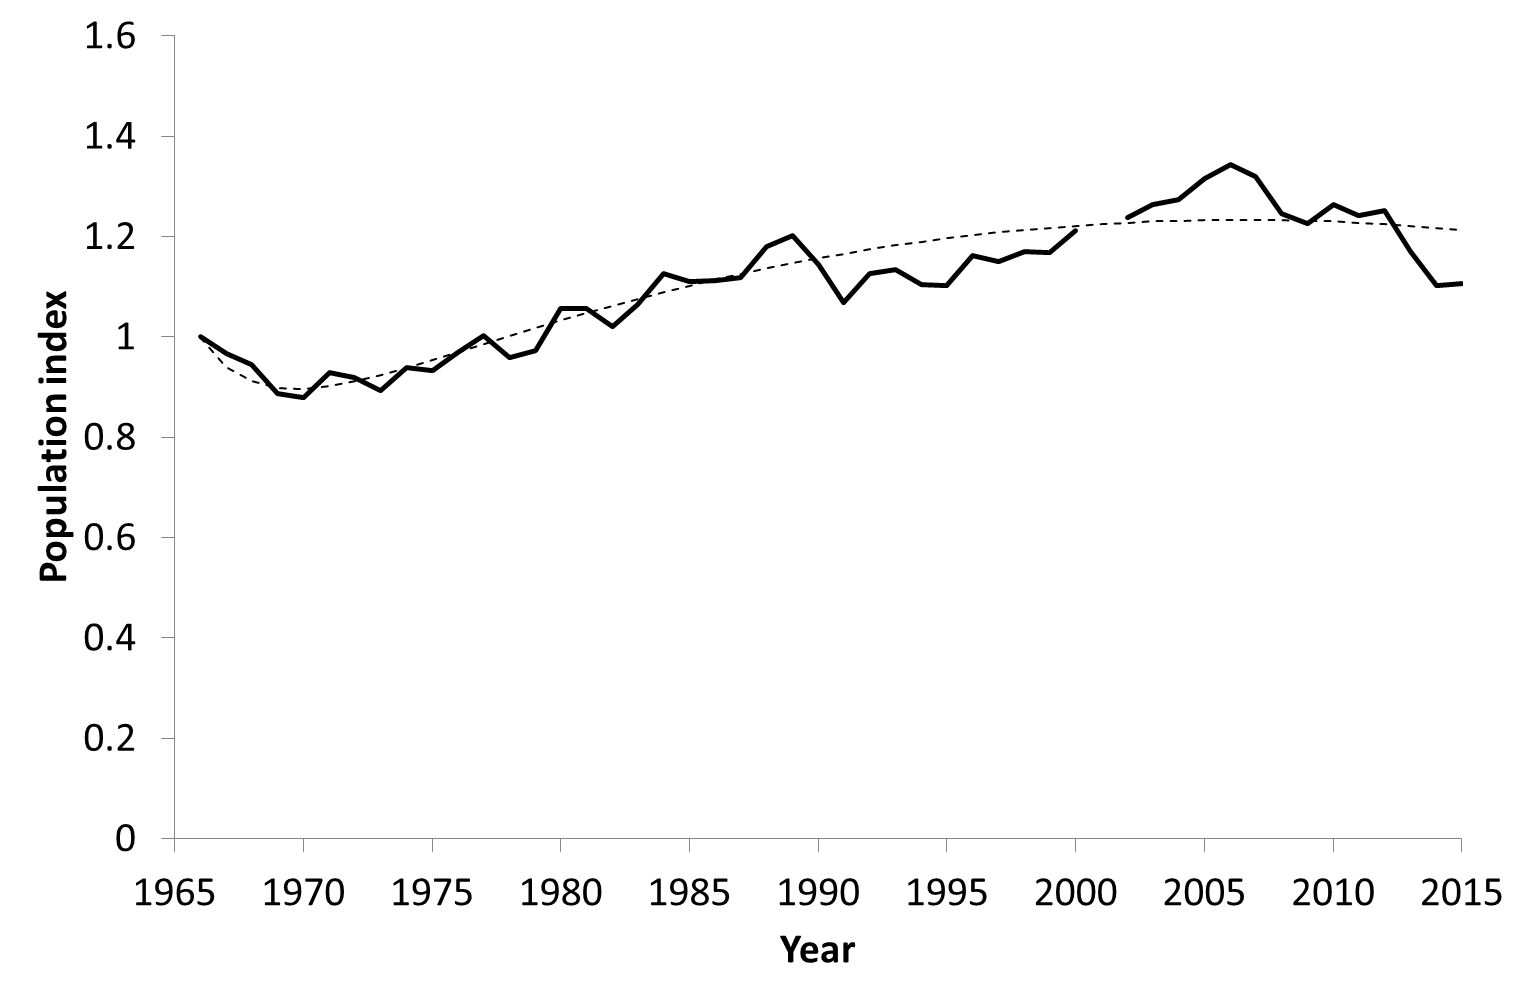


Chiffchaff


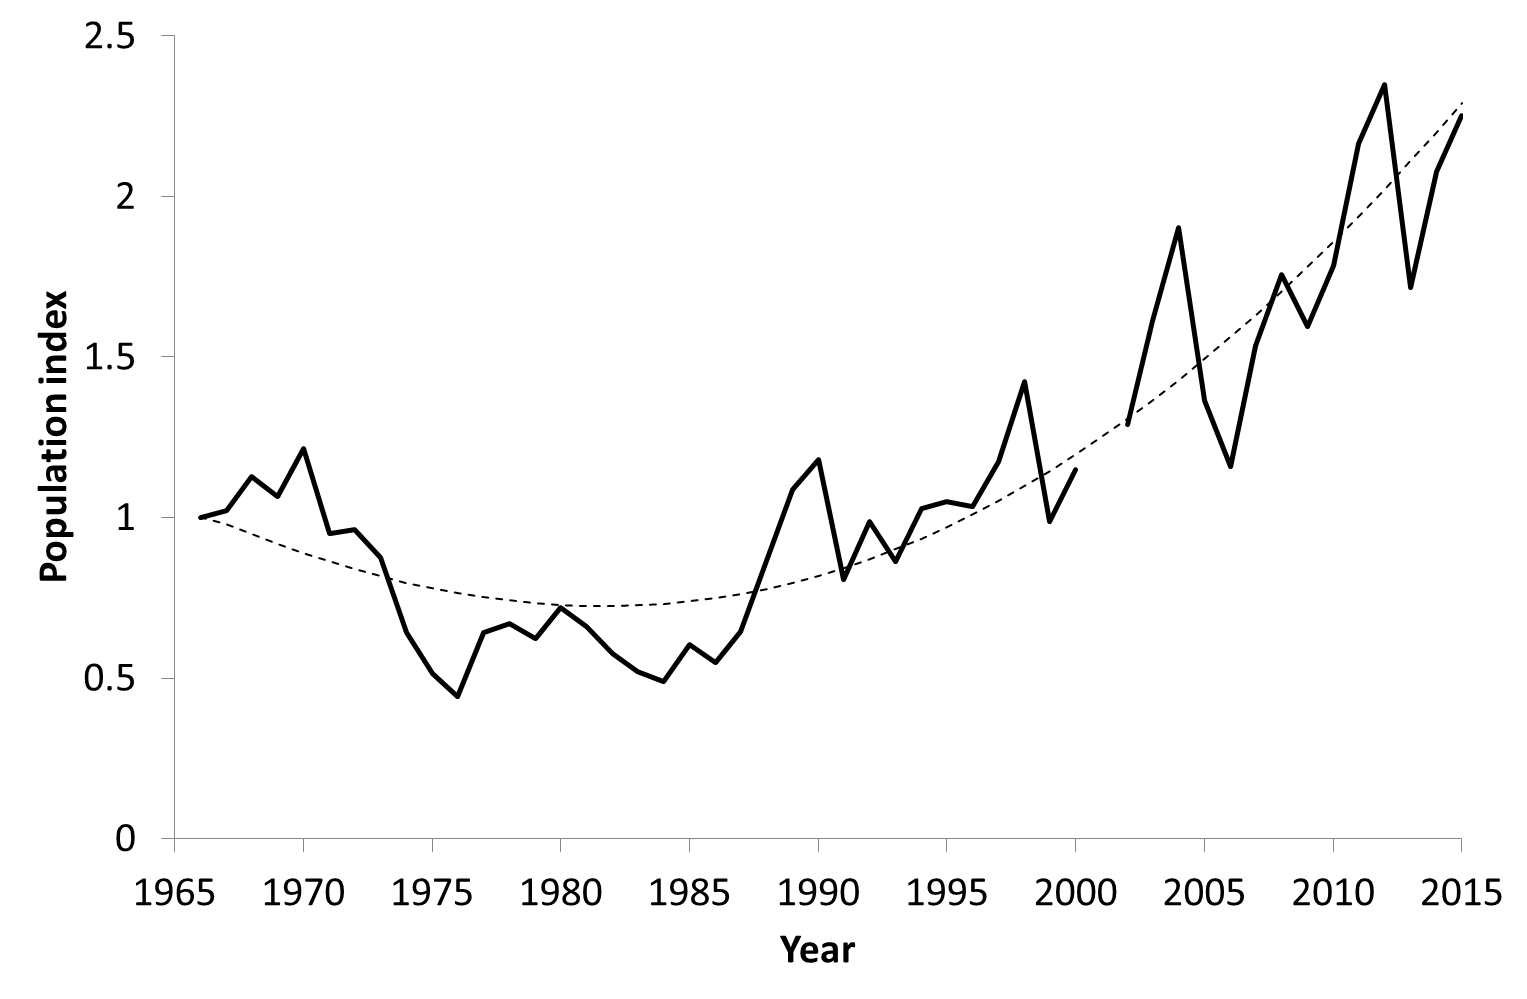


Coal tit


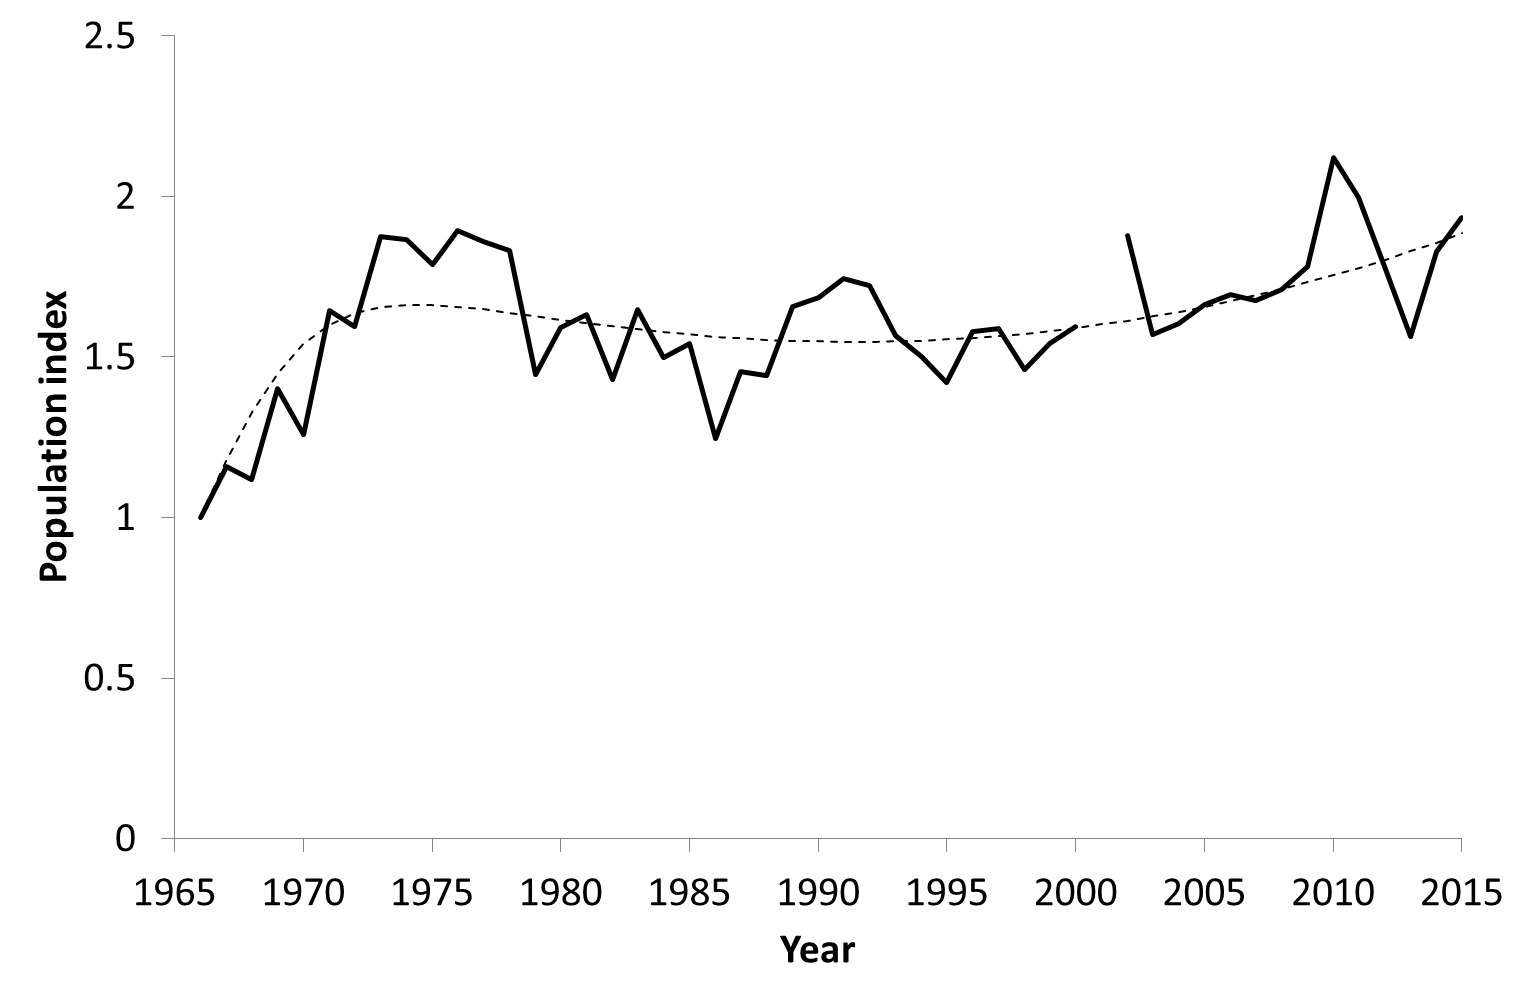


Coot


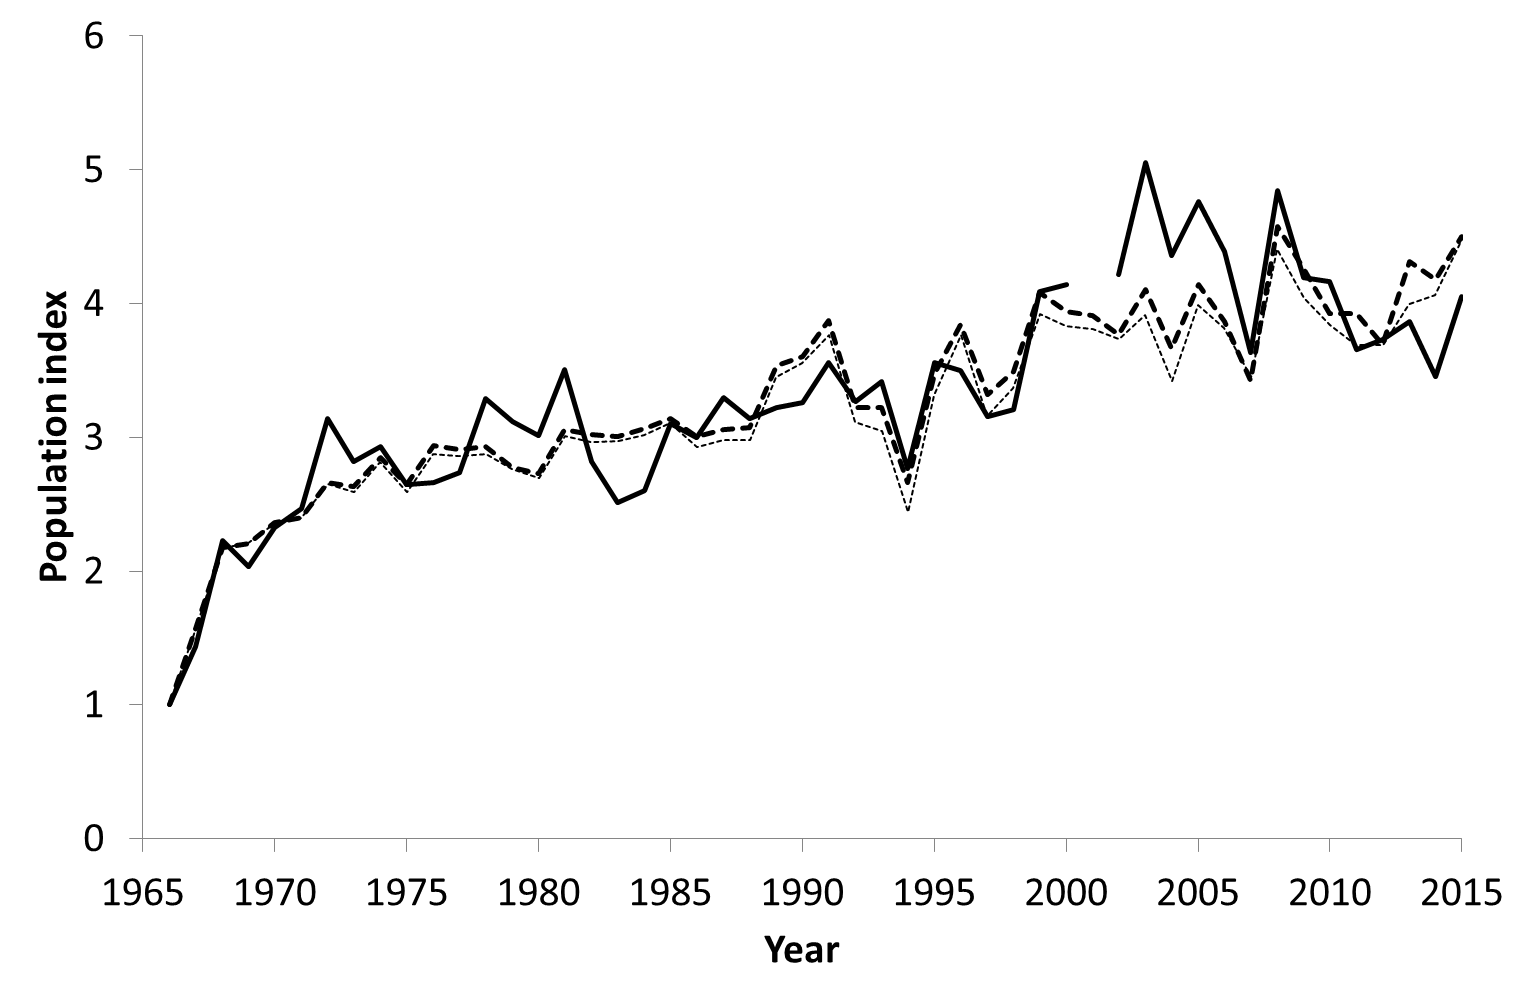


Corn bunting


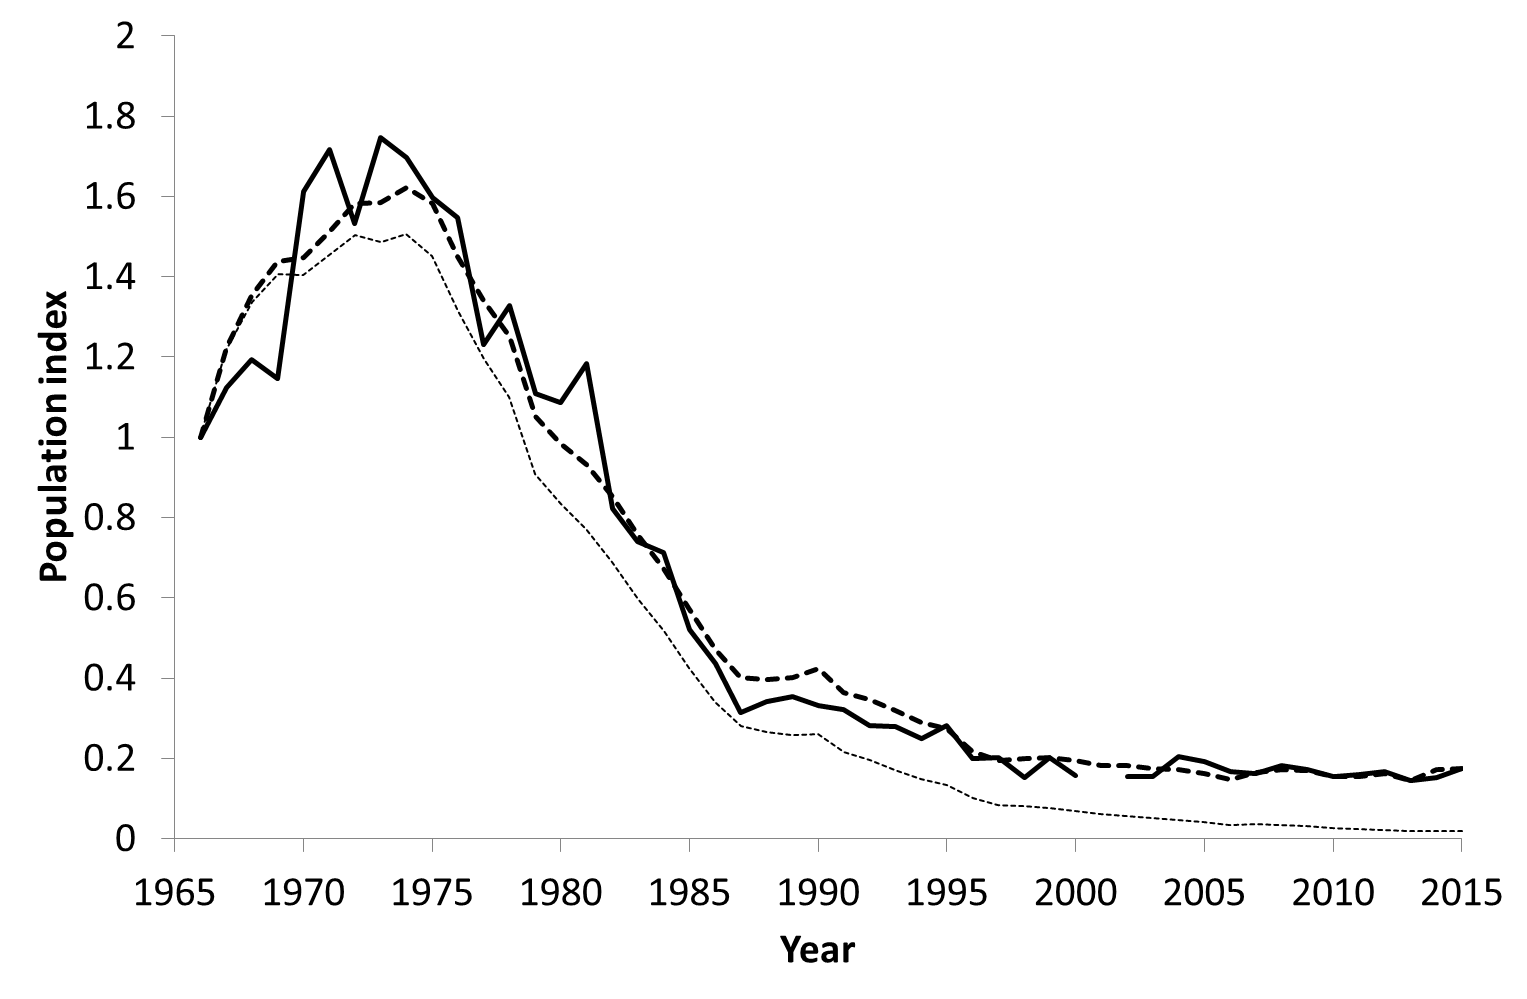


Cuckoo


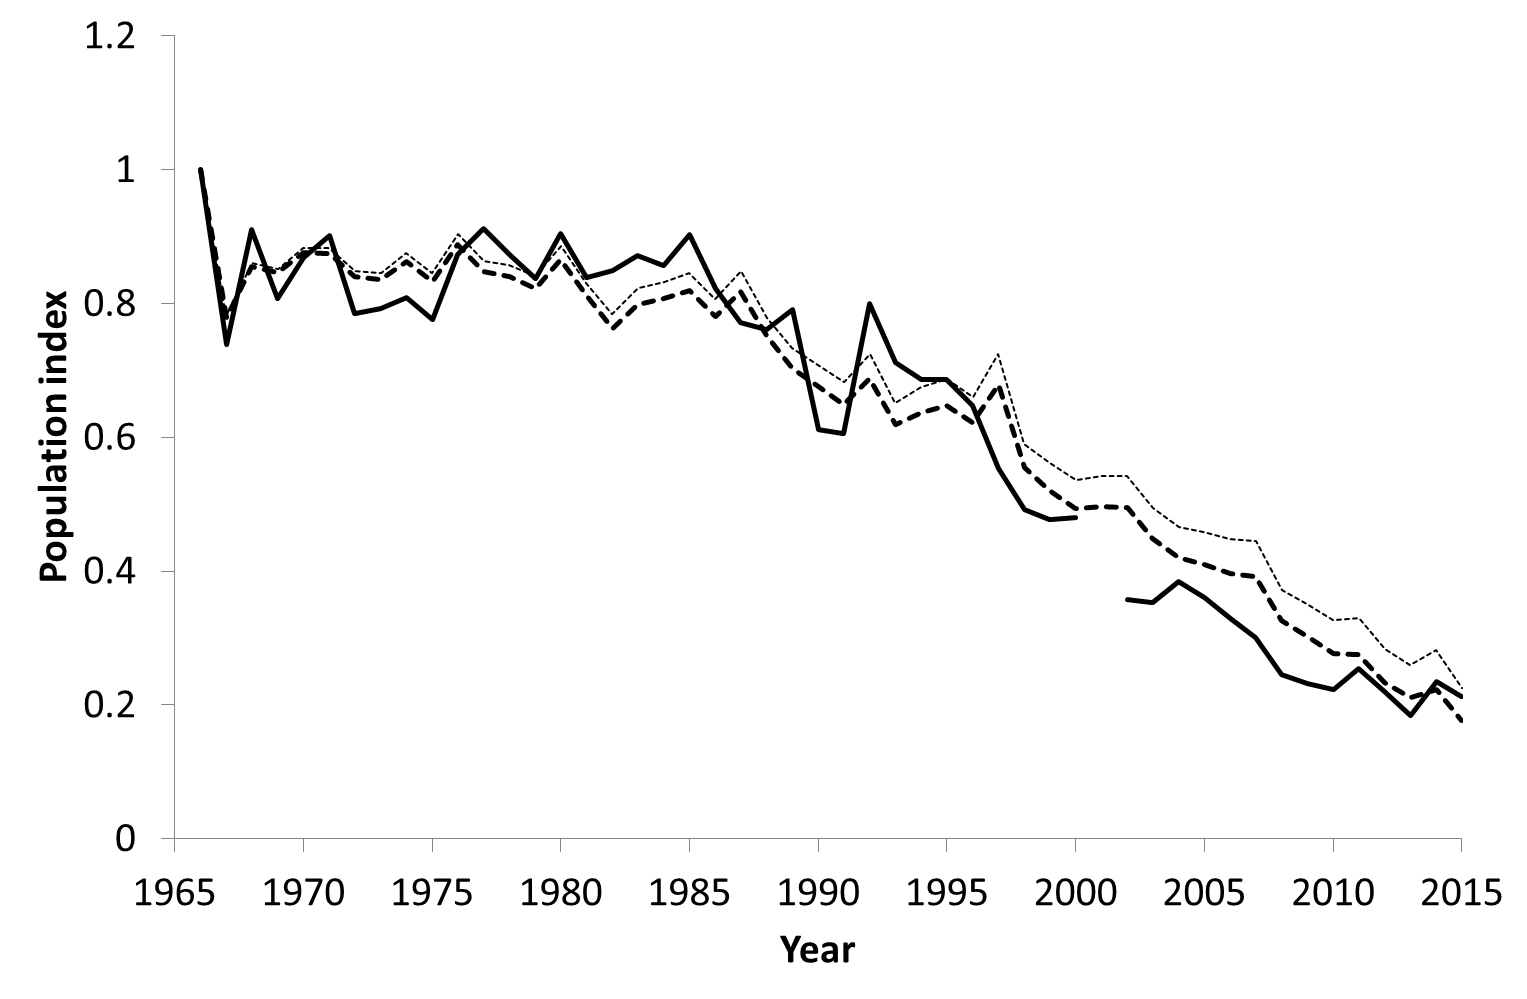


Curlew


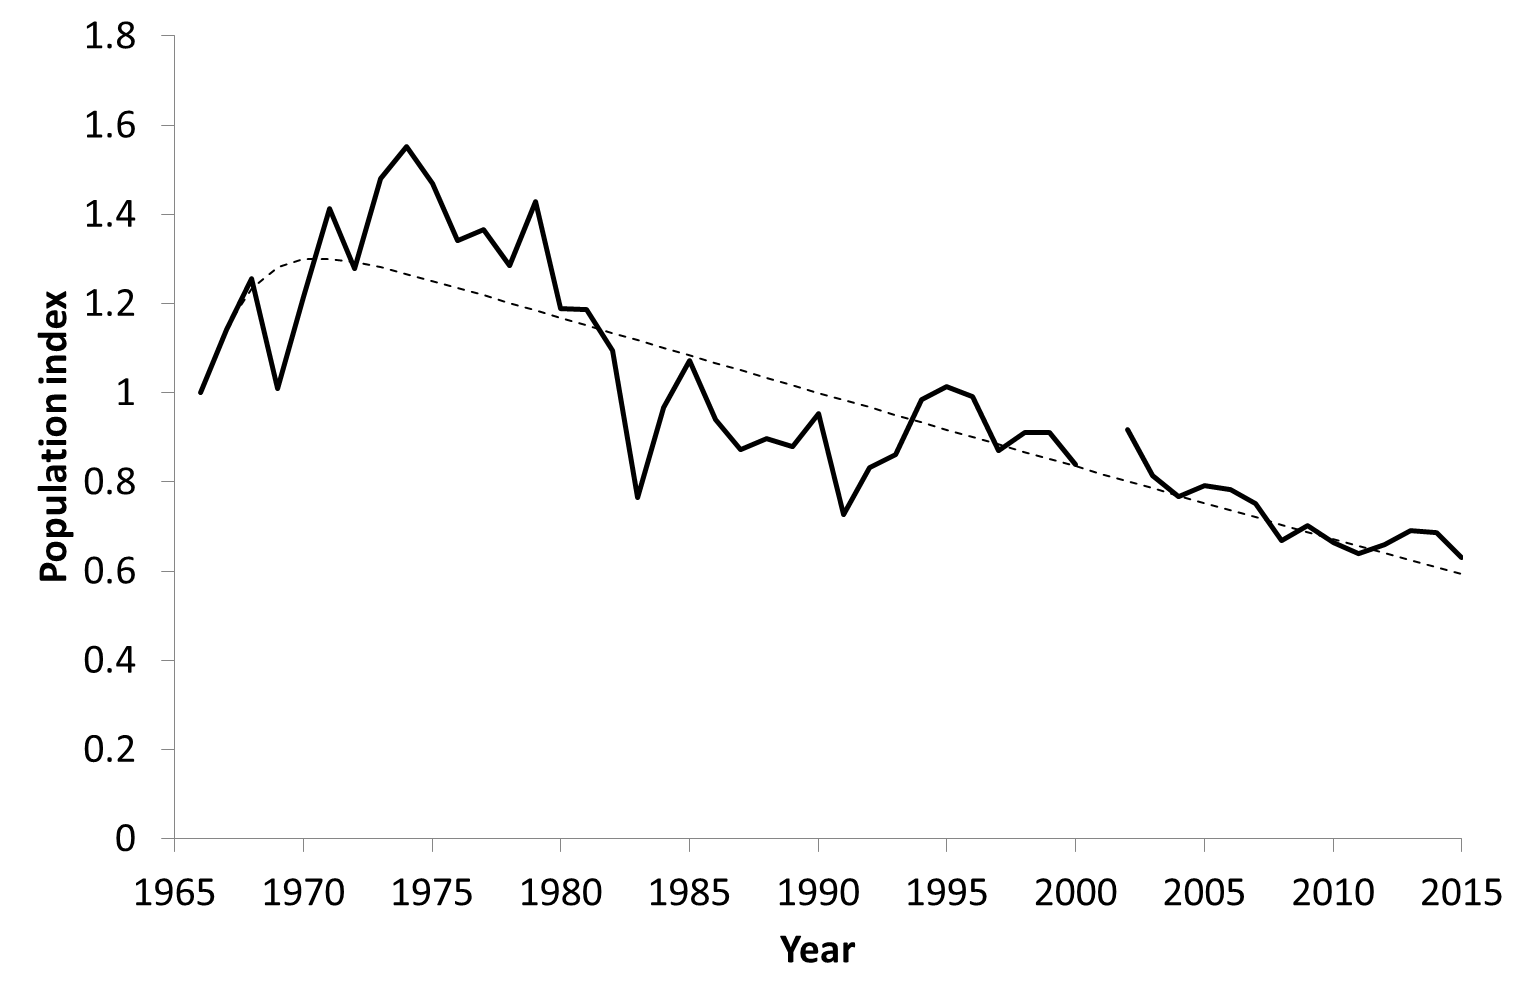


Dunnock


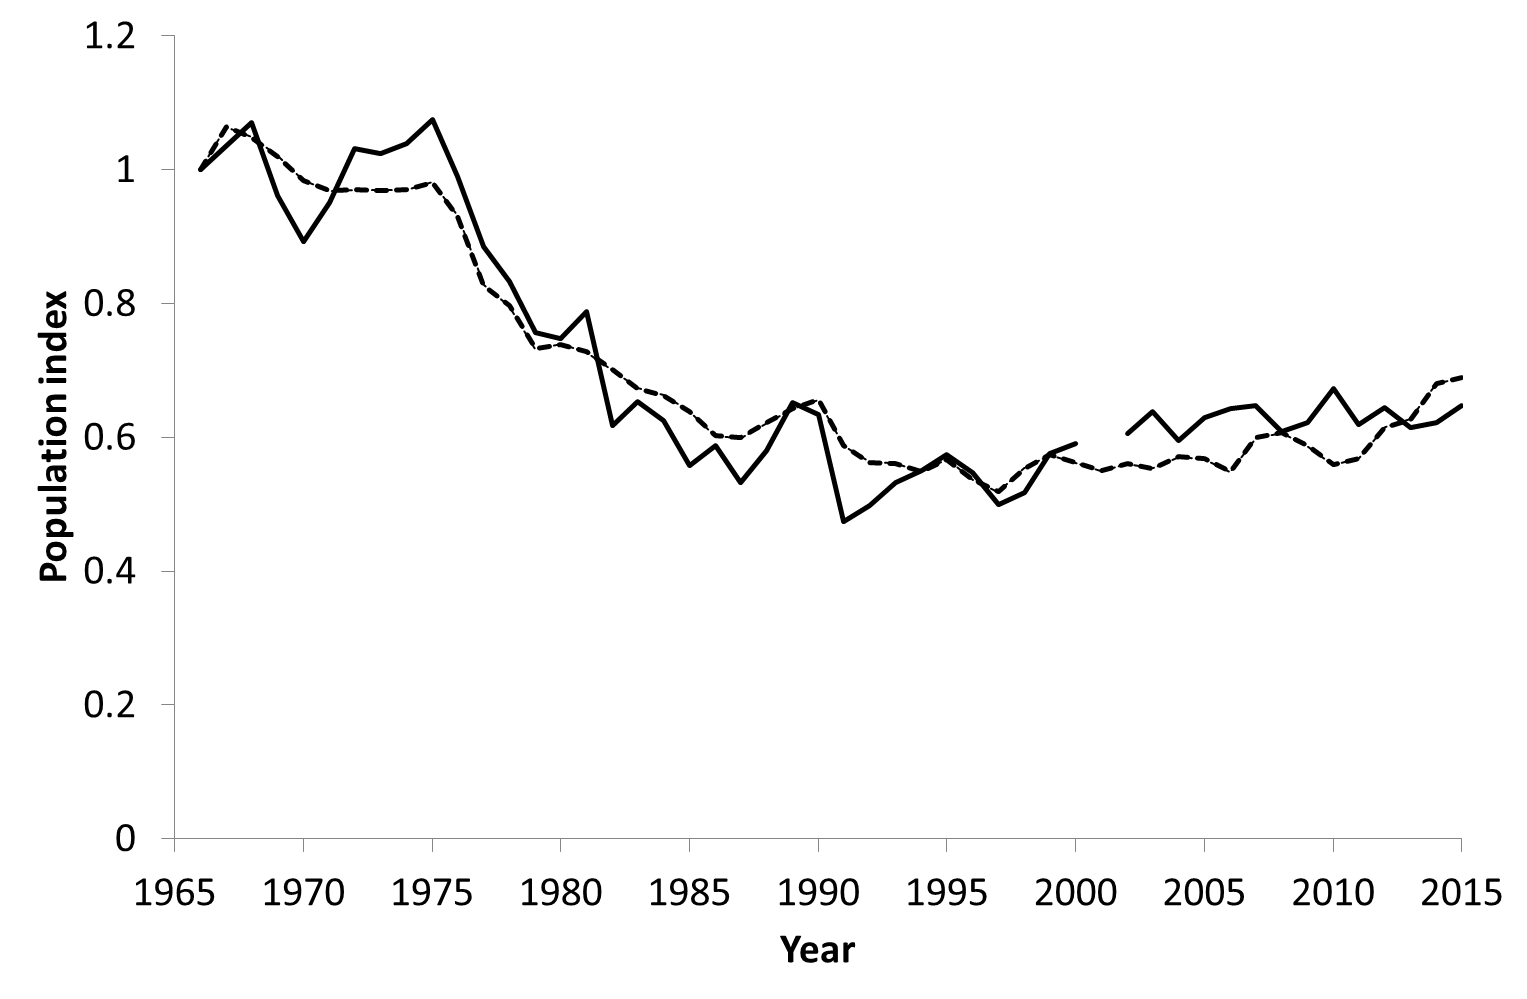


Garden warbler


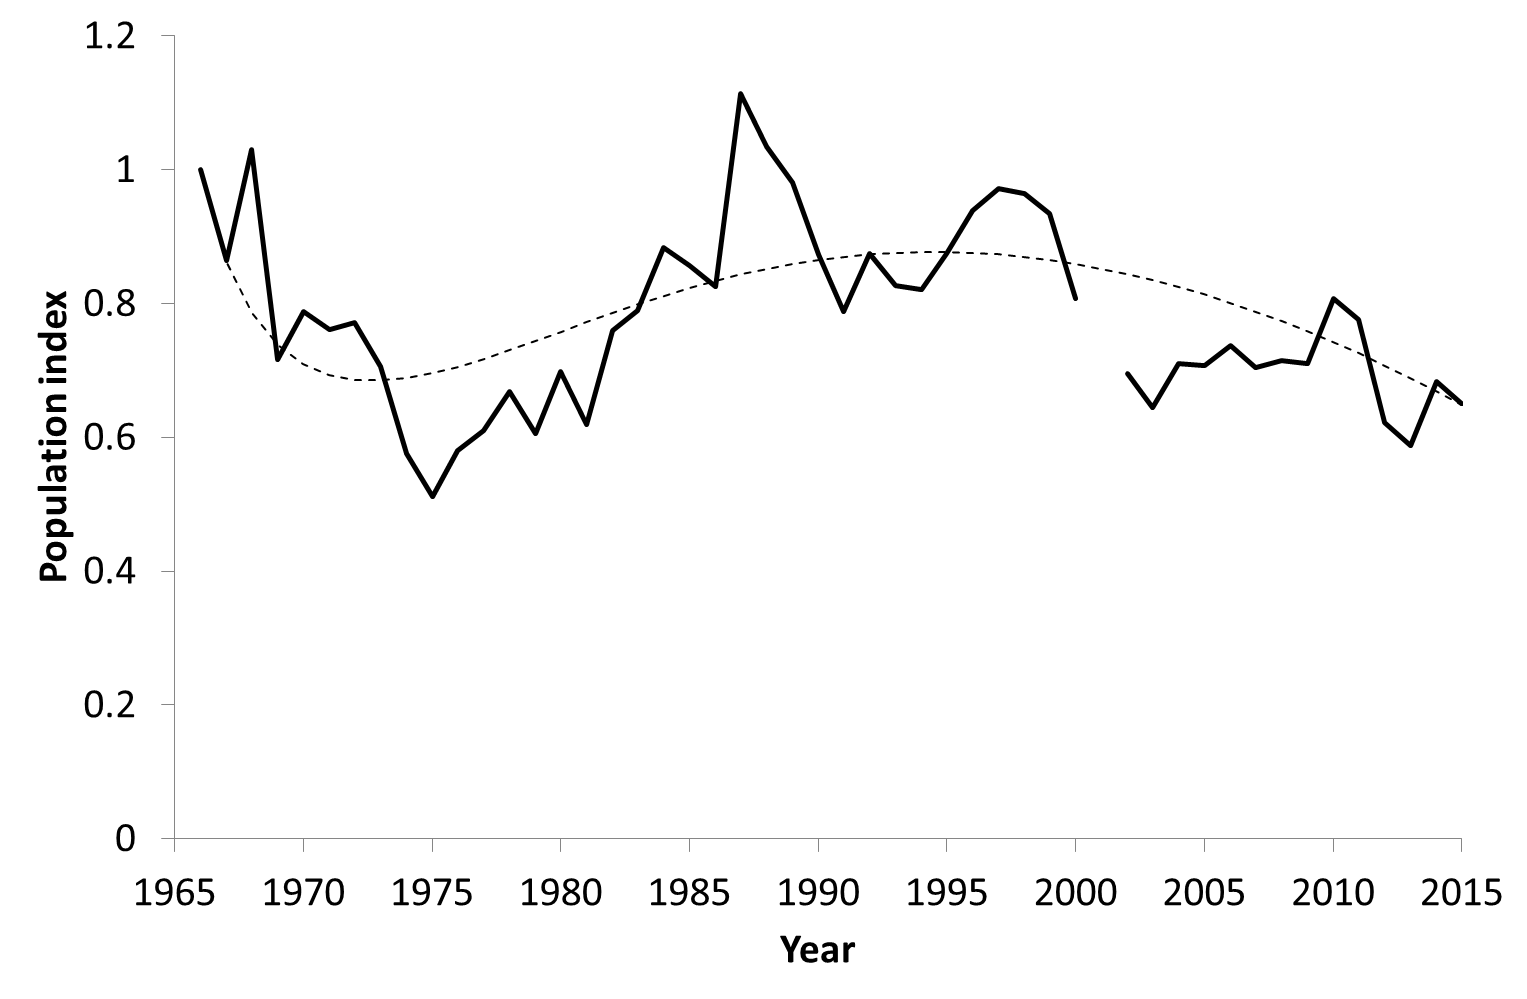


Goldcrest


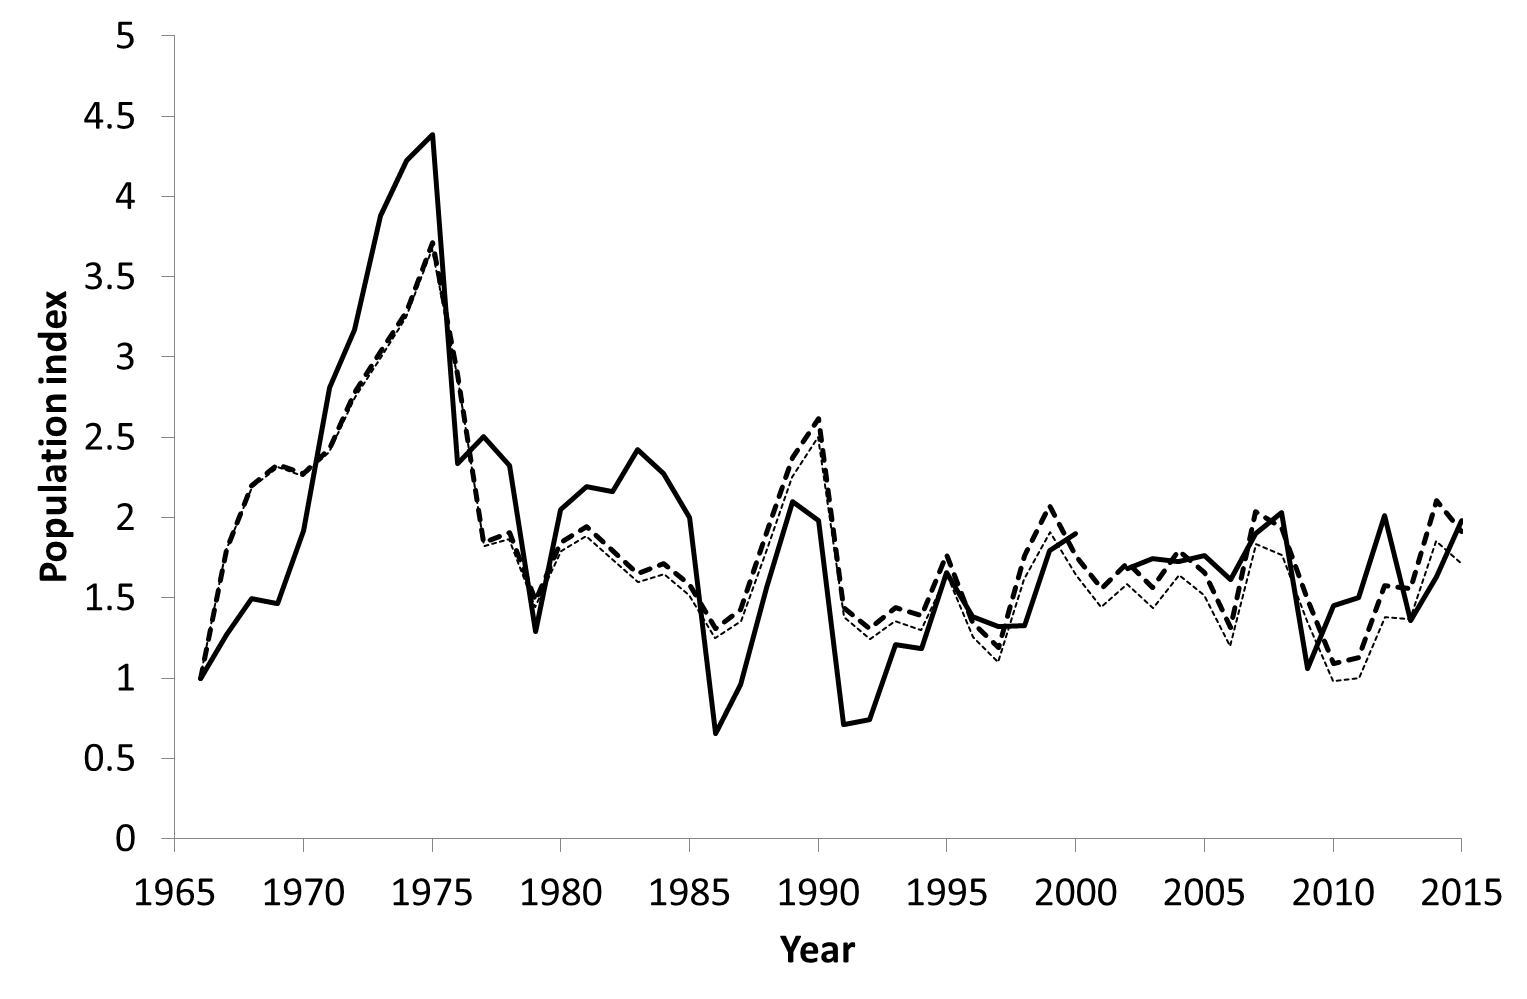


Goldfinch


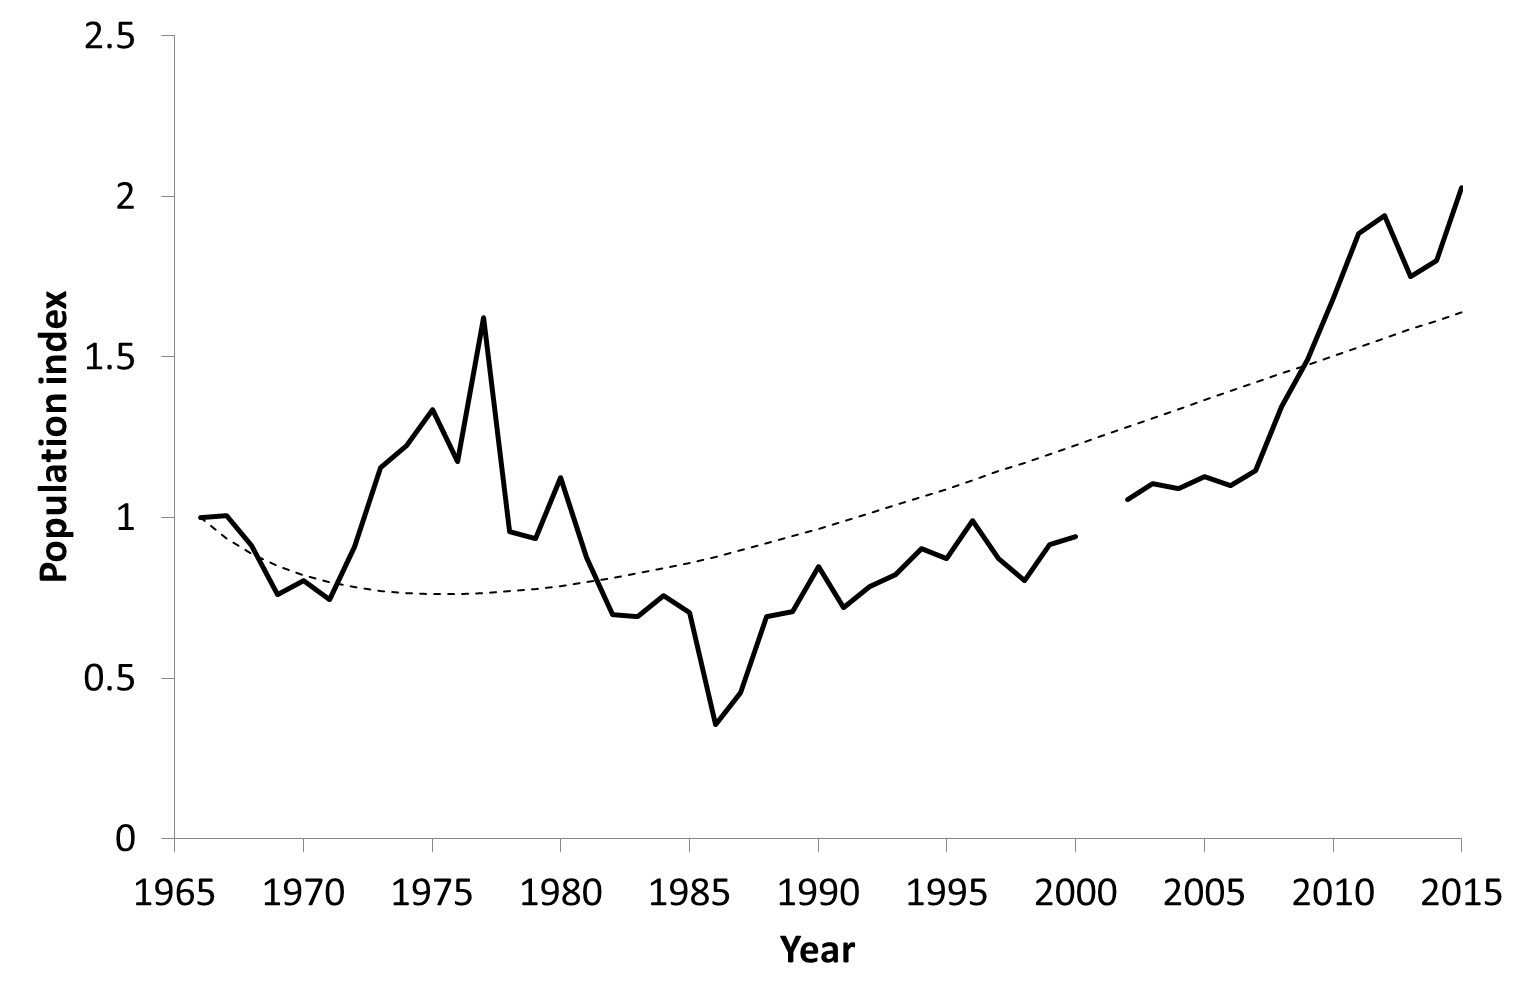


Greenfinch


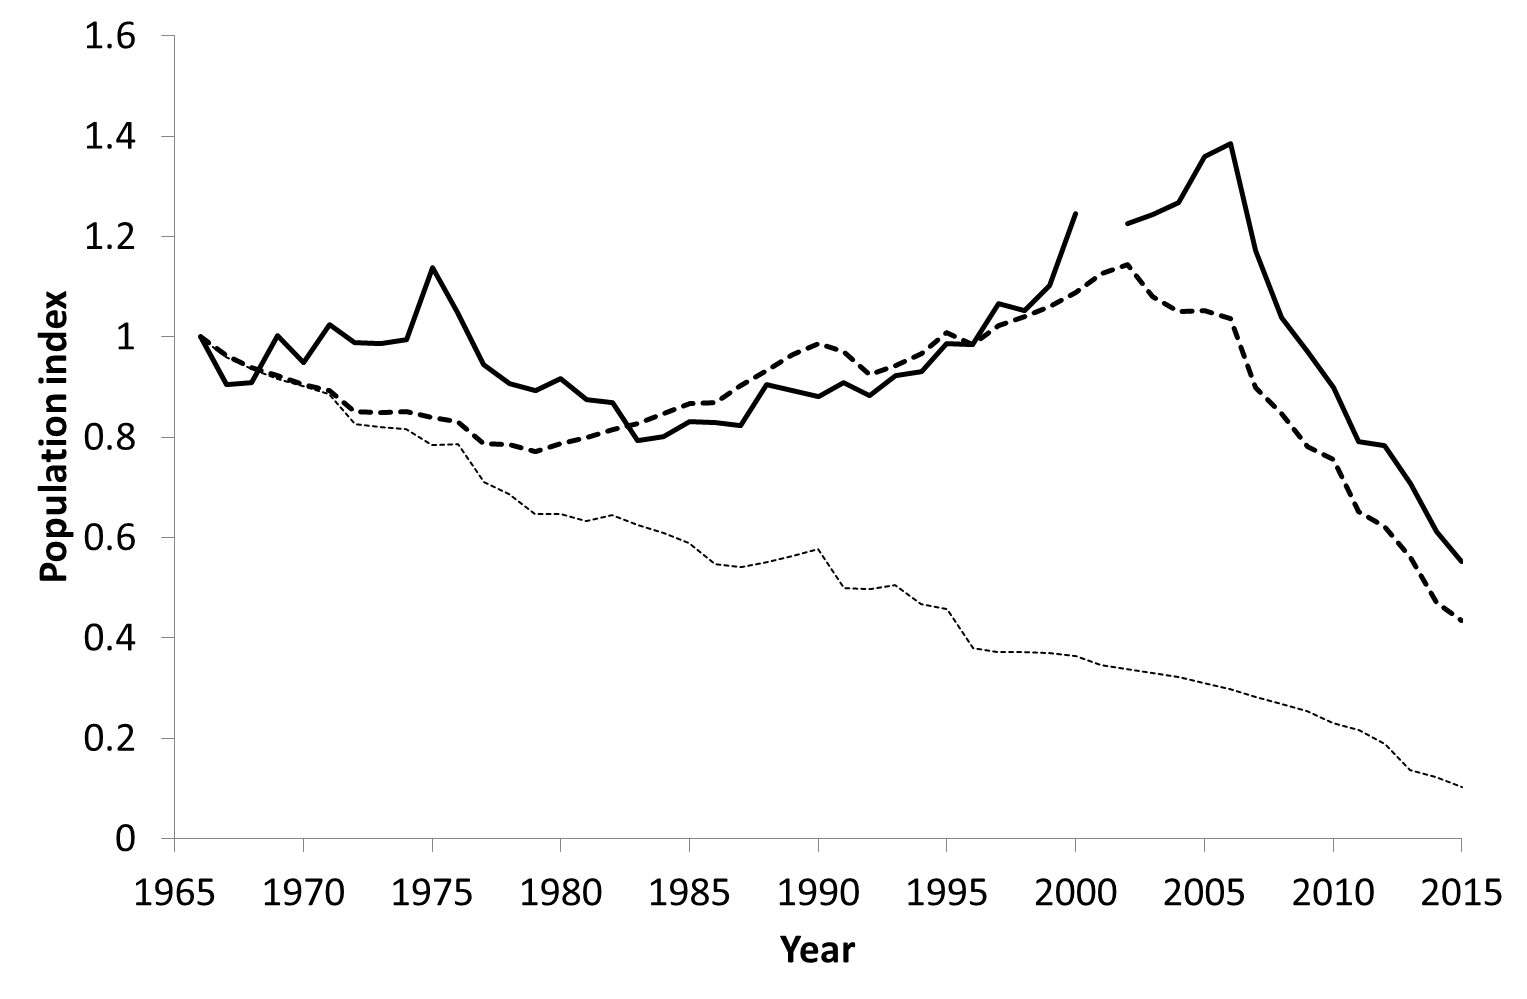


Grey partridge


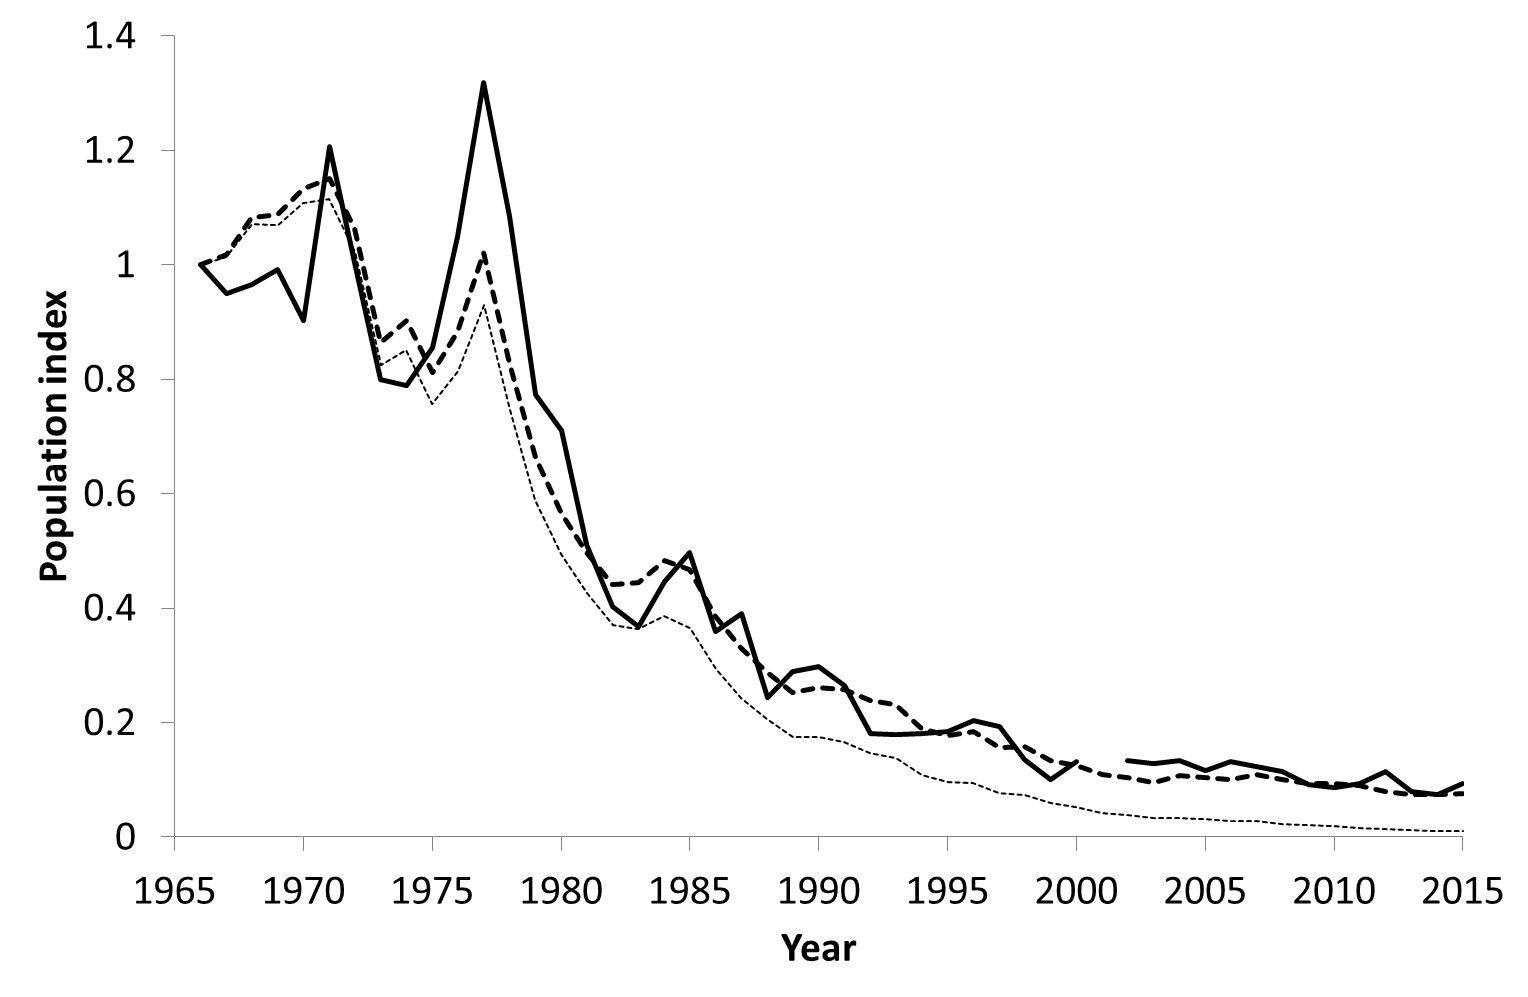


Great tit


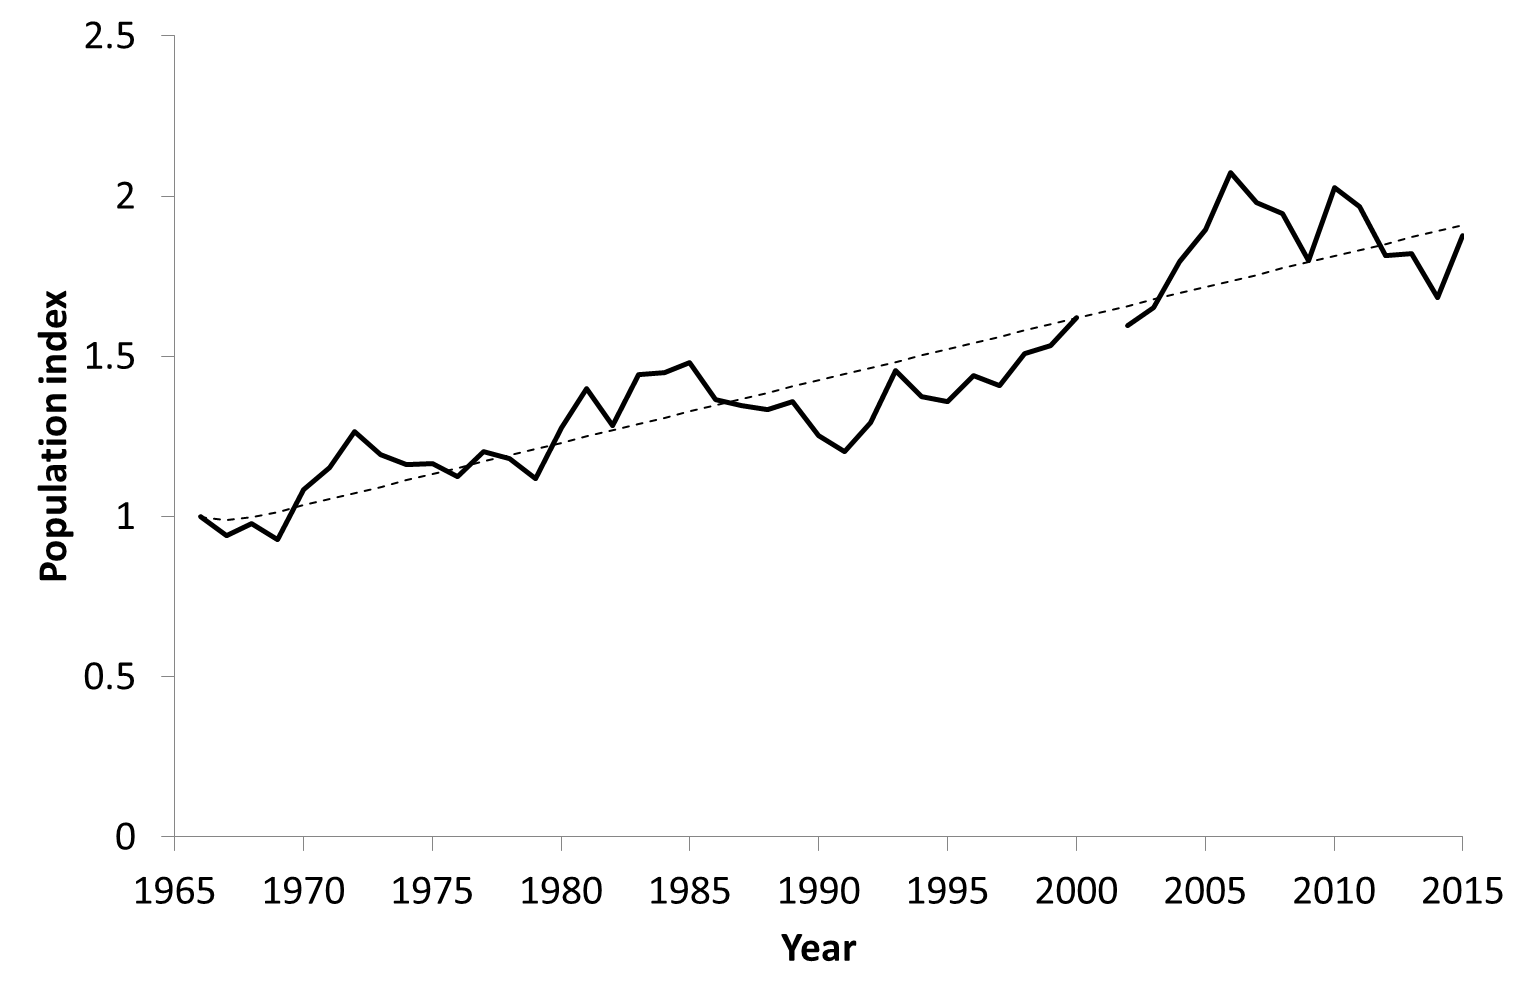


Green woodpecker


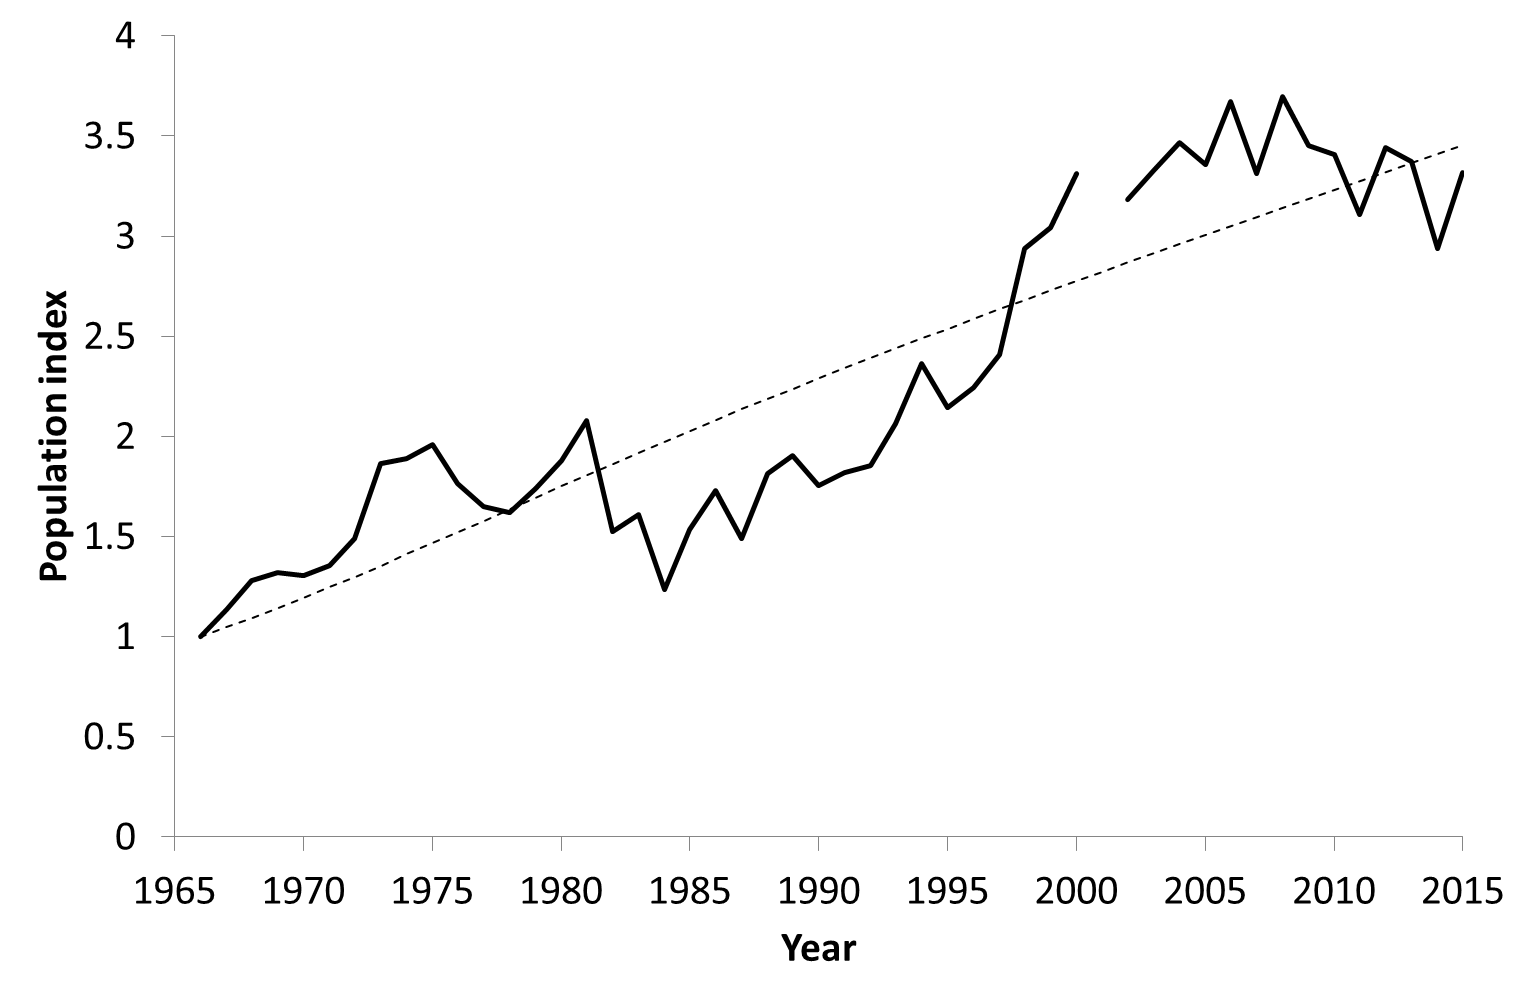


Great-spotted woodpecker


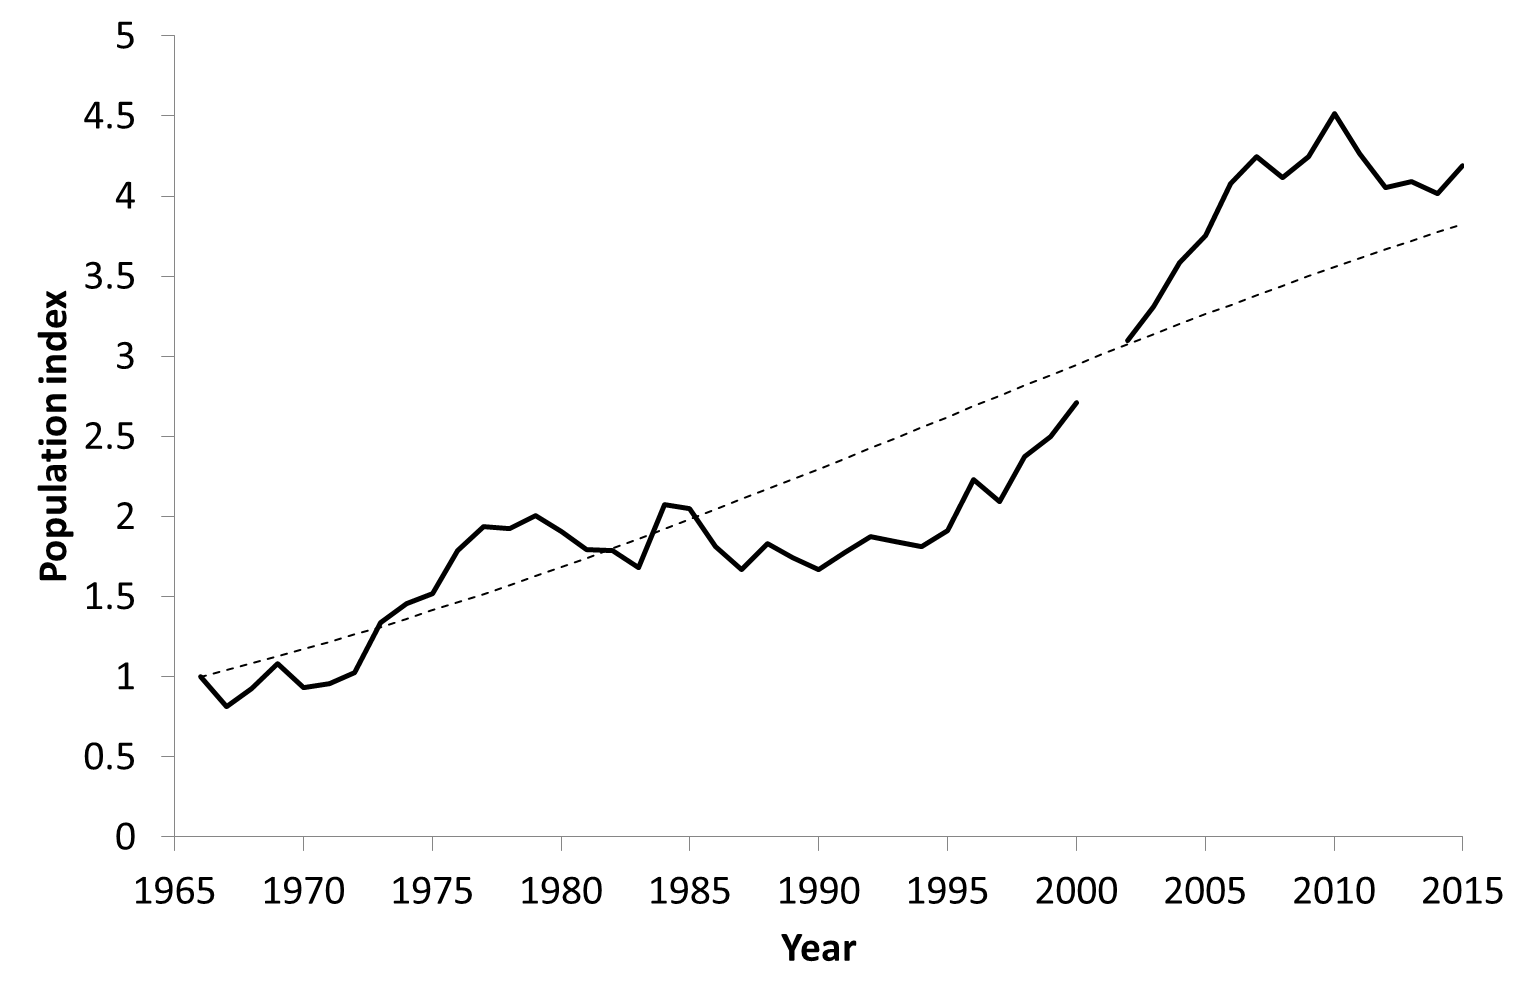


House martin


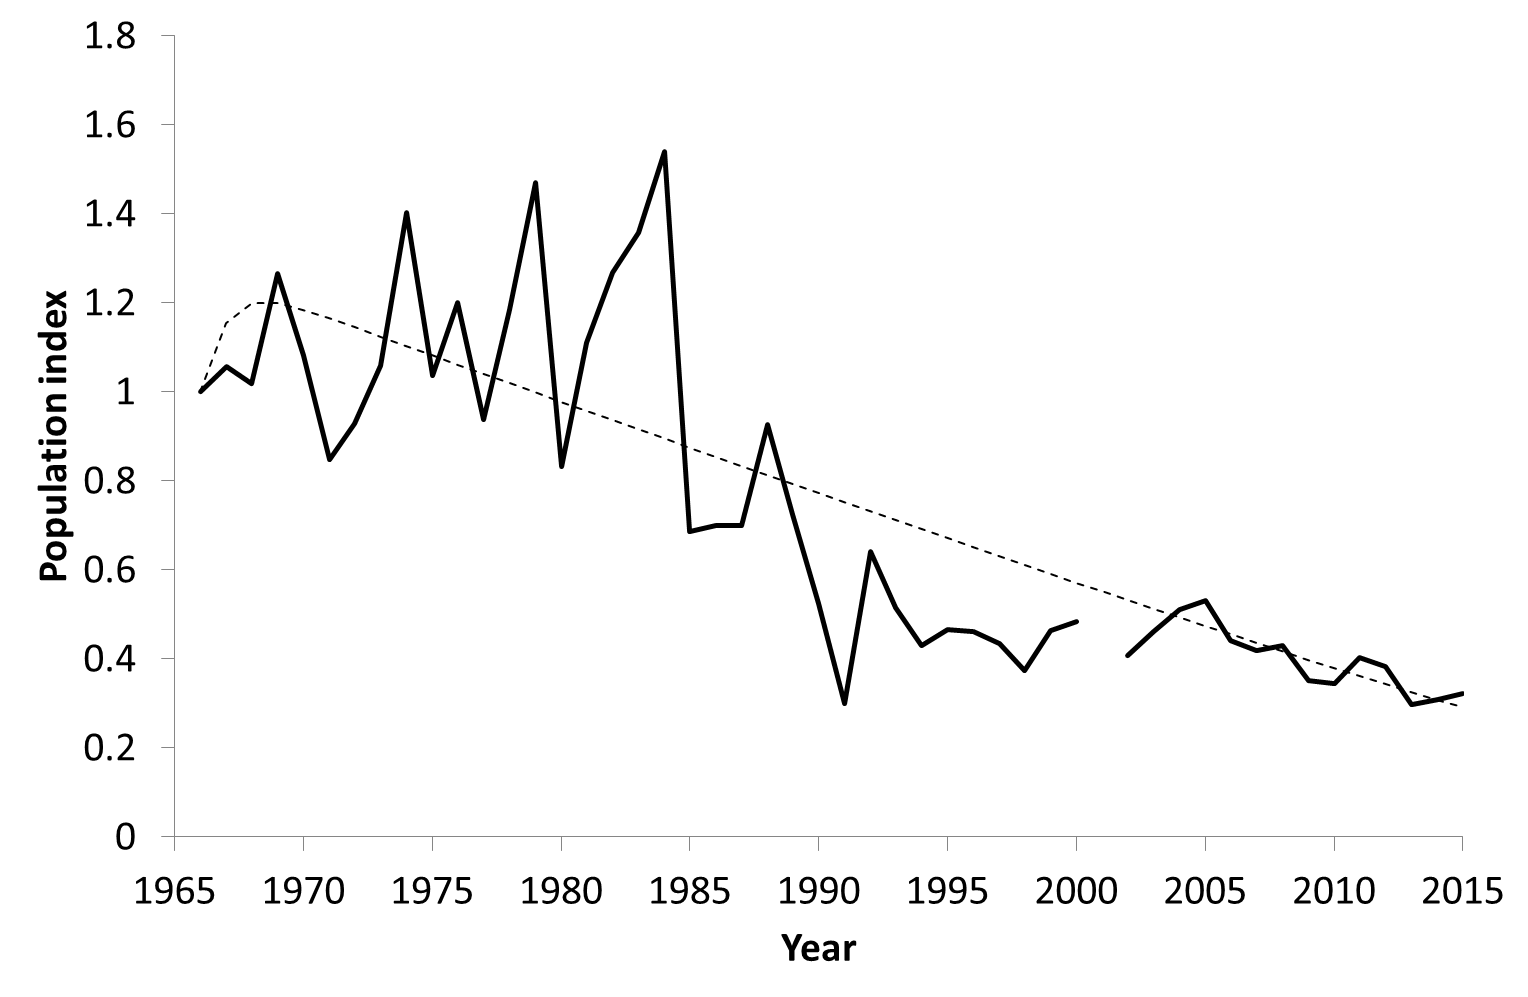


Jackdaw


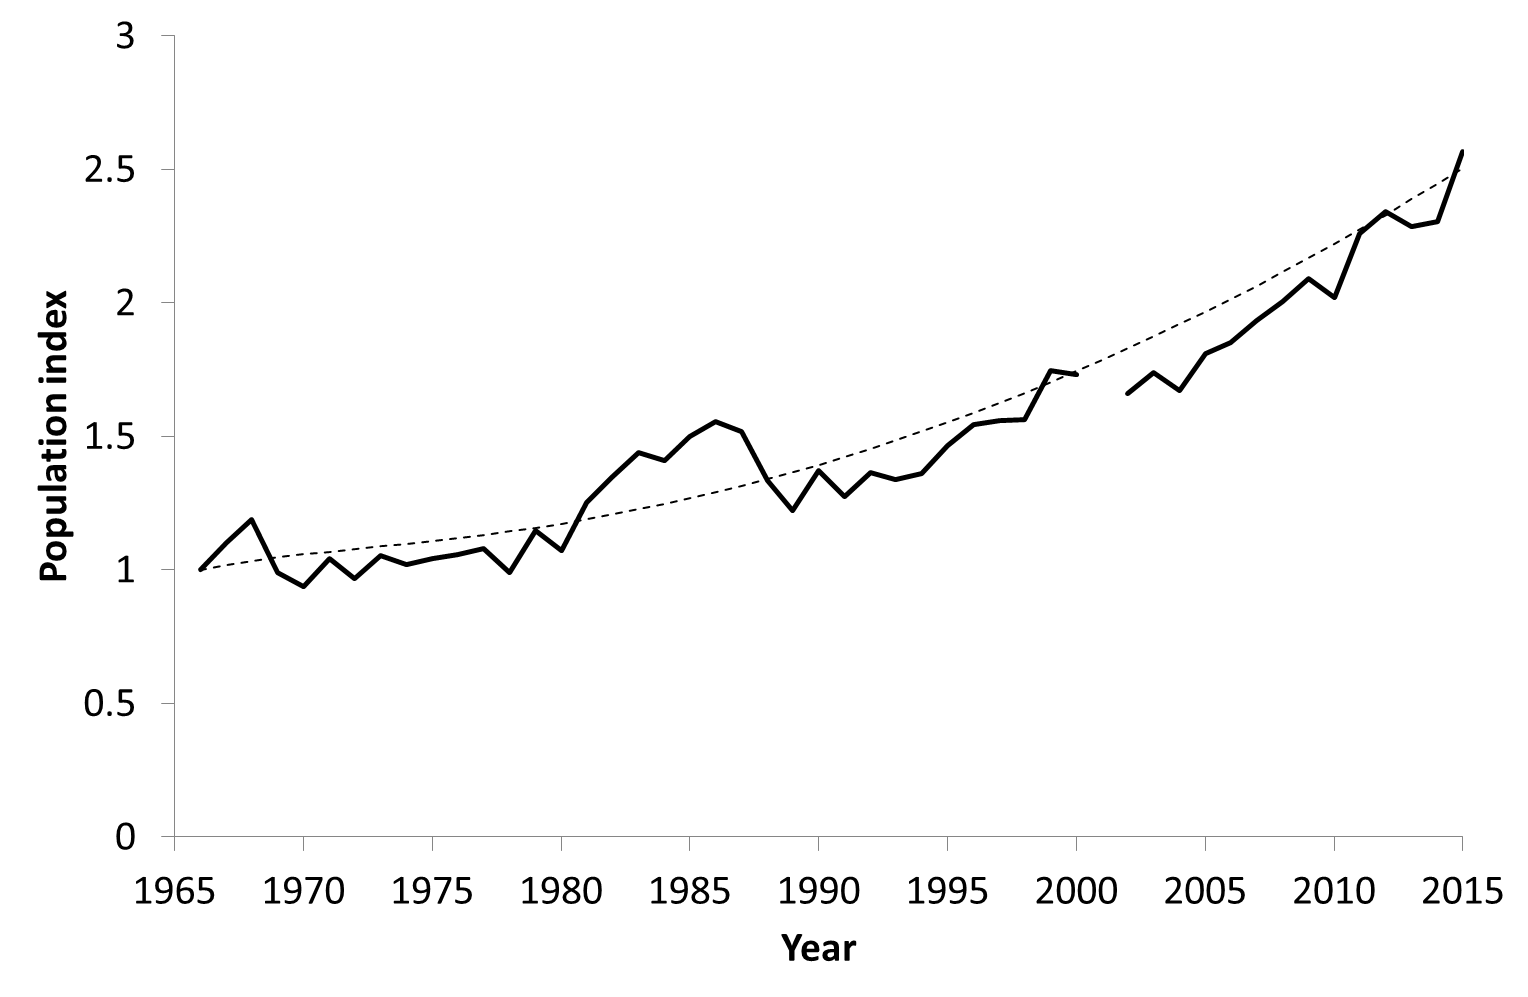


Jay


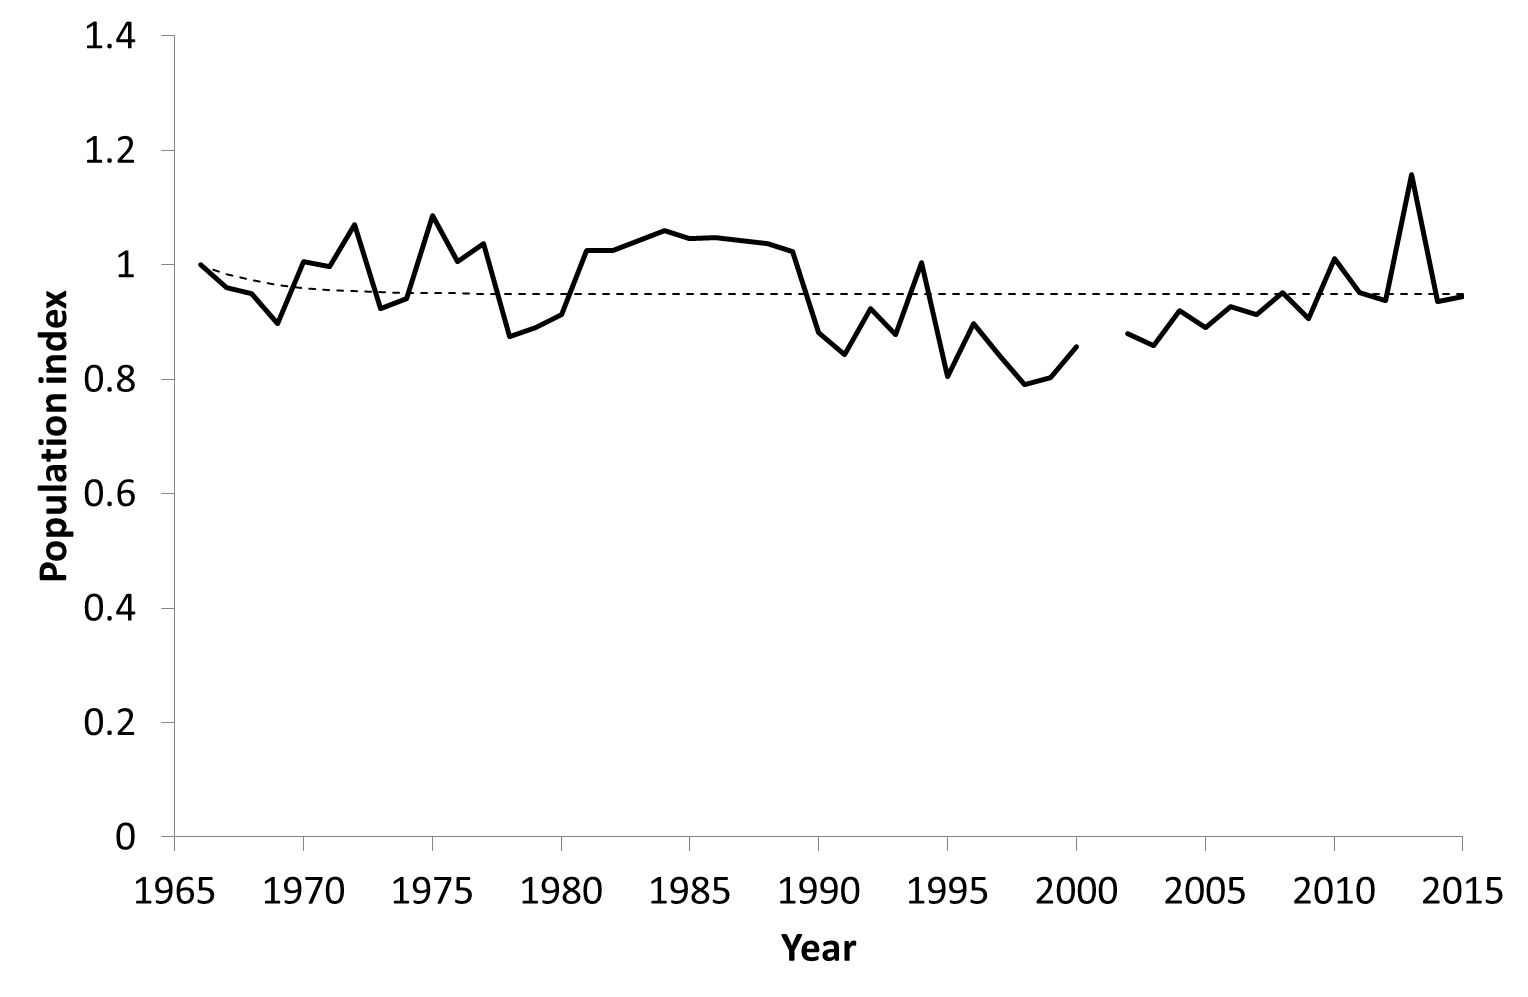


Kestrel


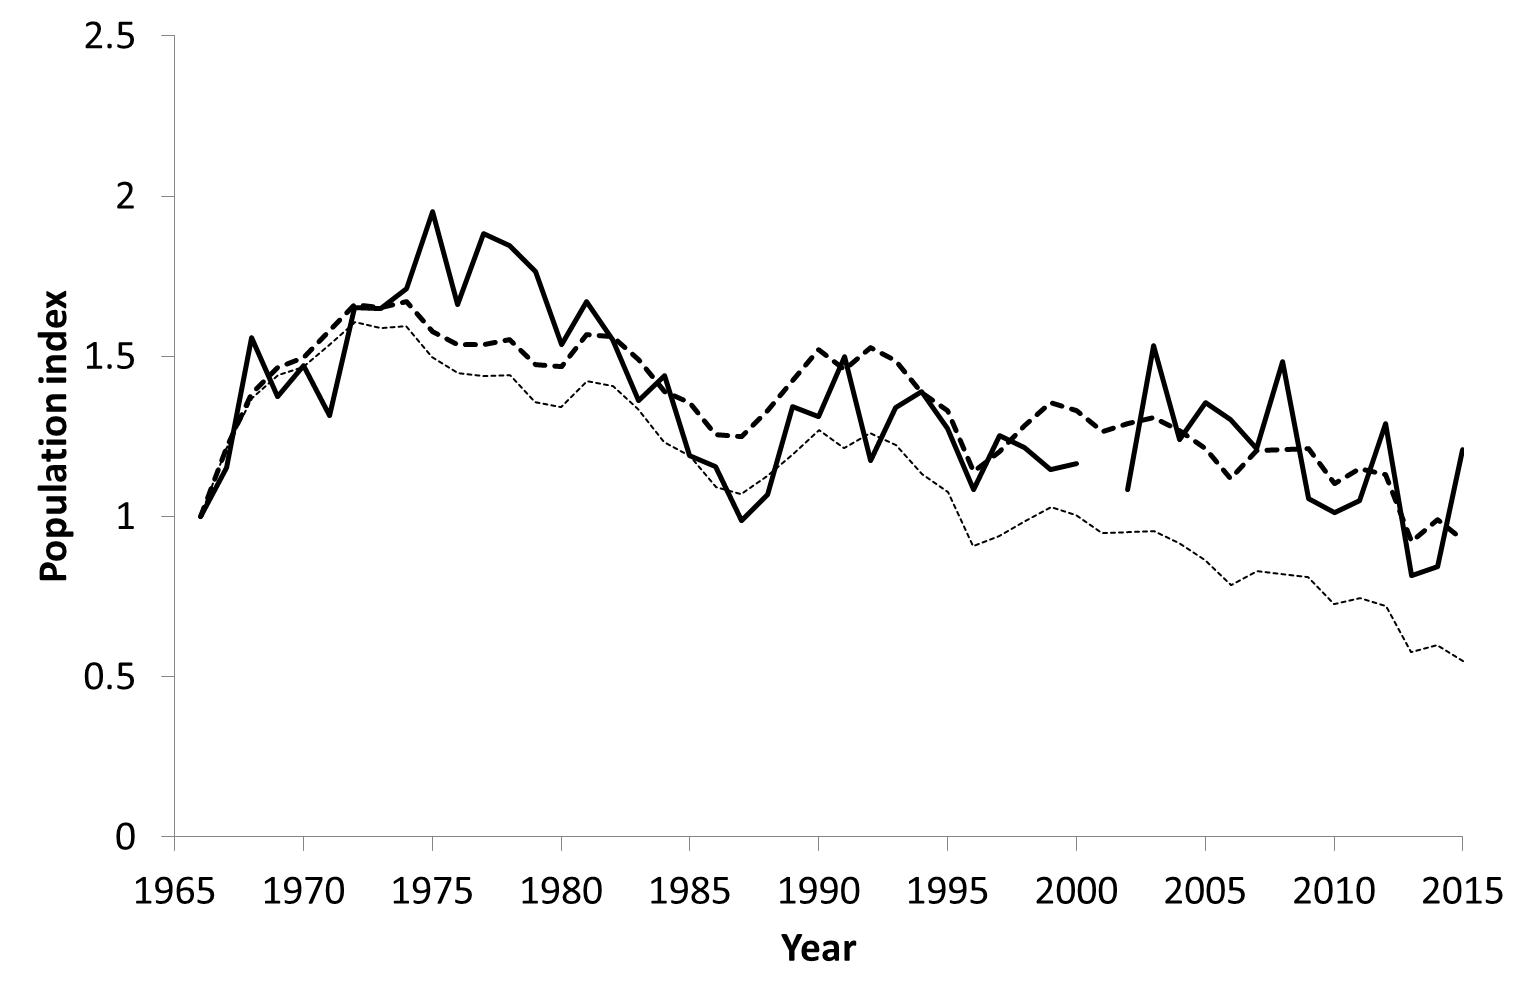


Lapwing


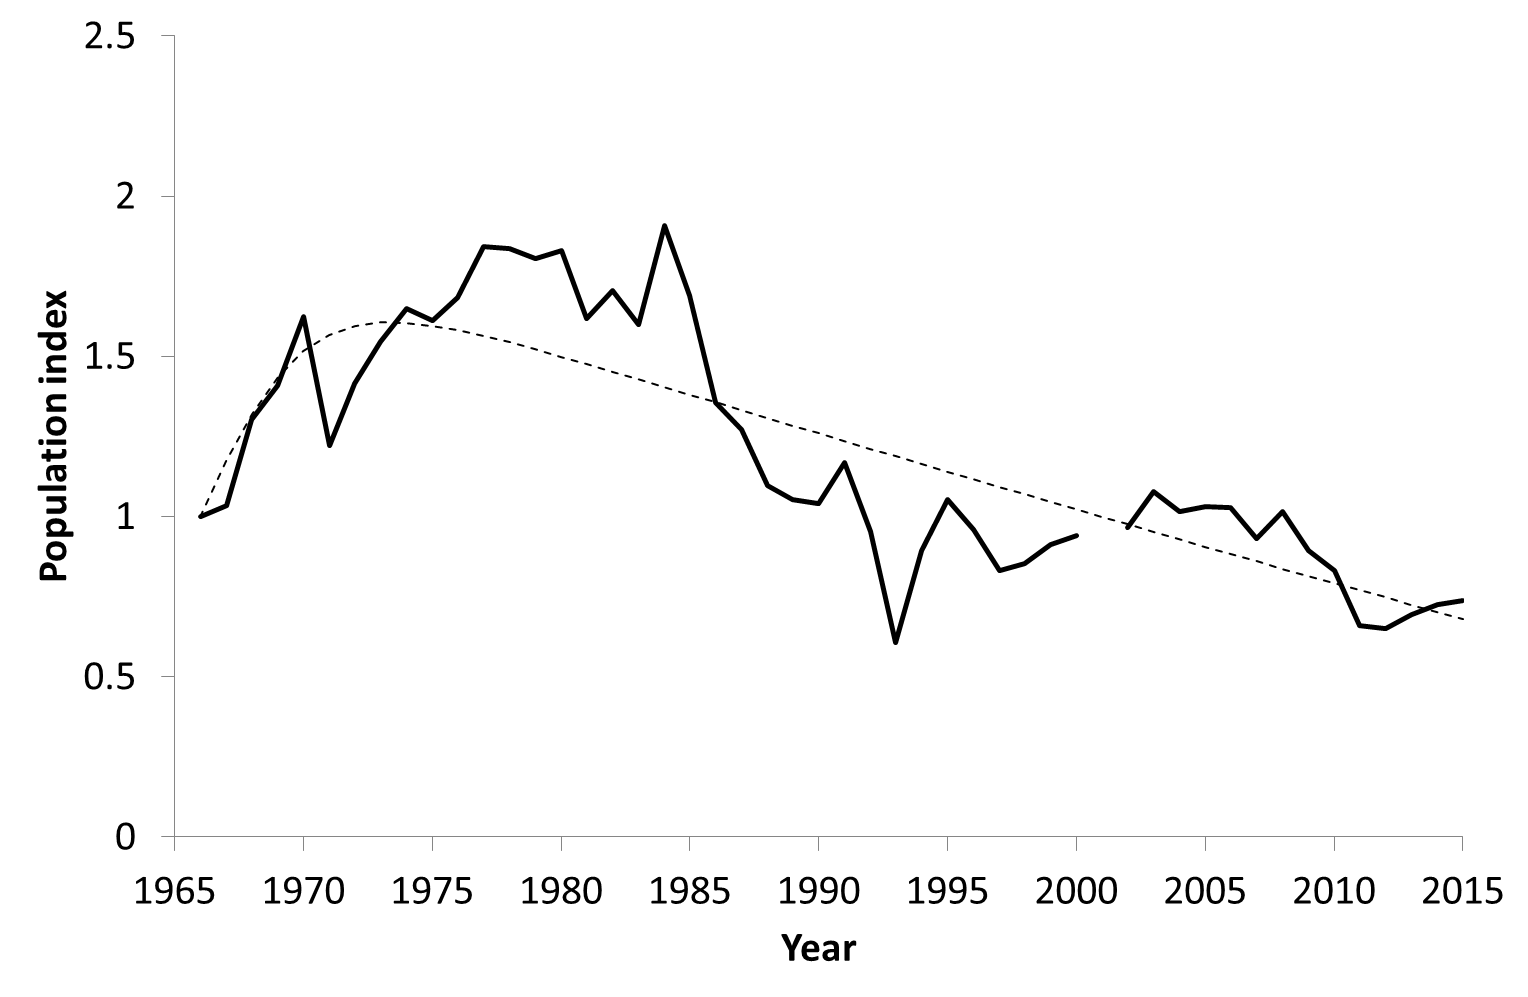


Lesser redpoll


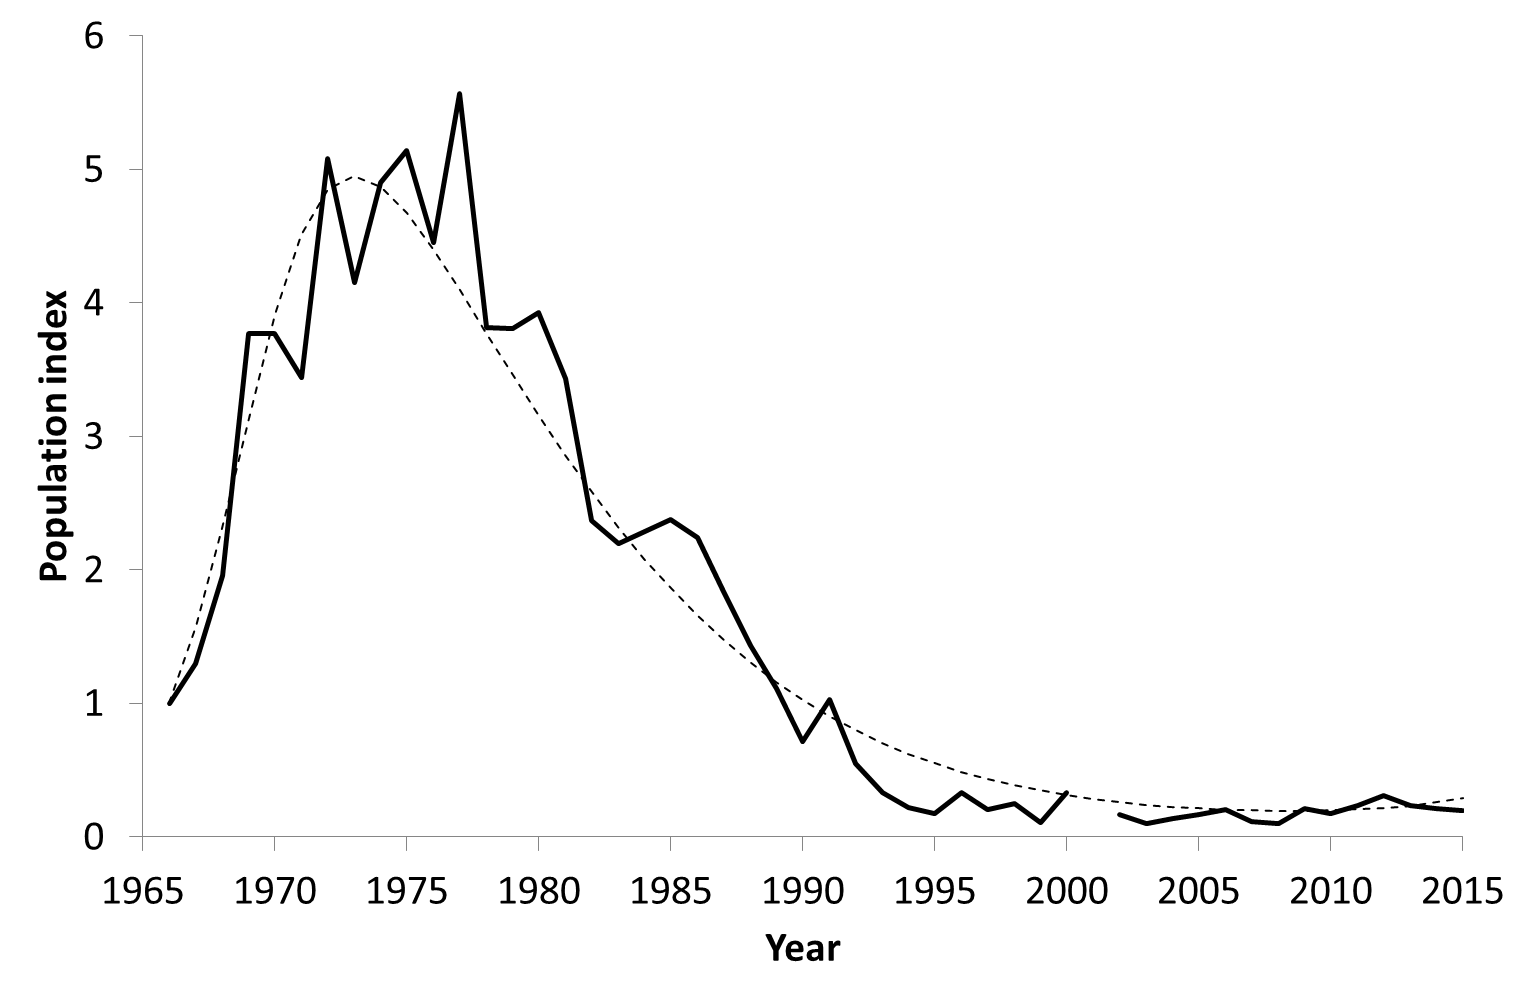


Lesser whitethroat


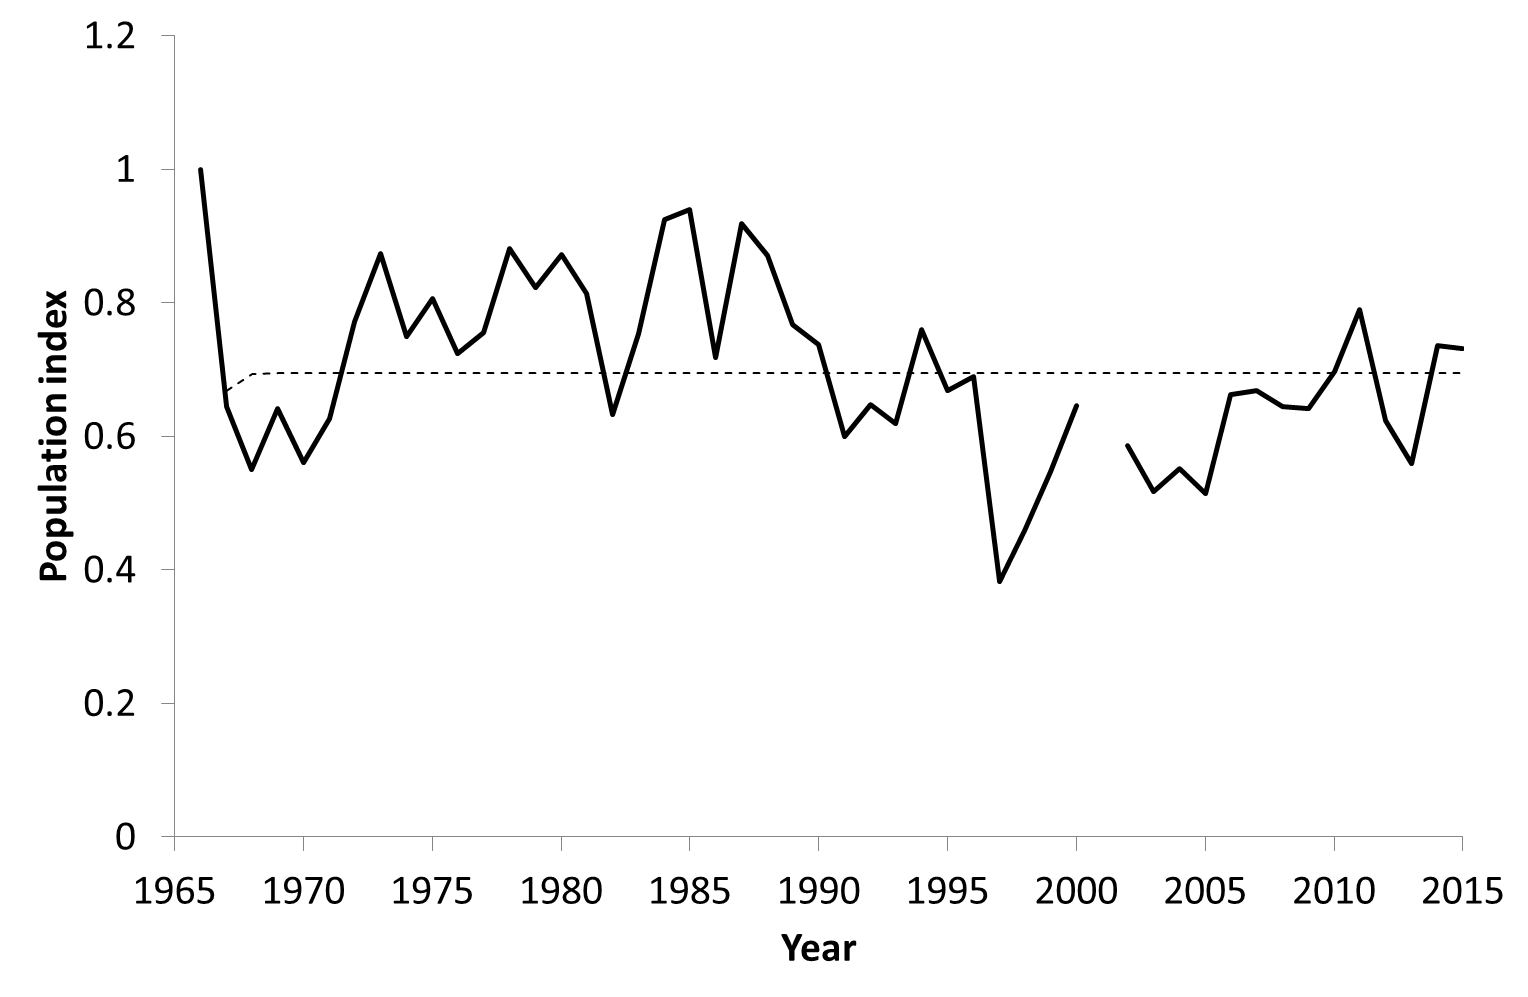


Lesser-spotted woodpecker


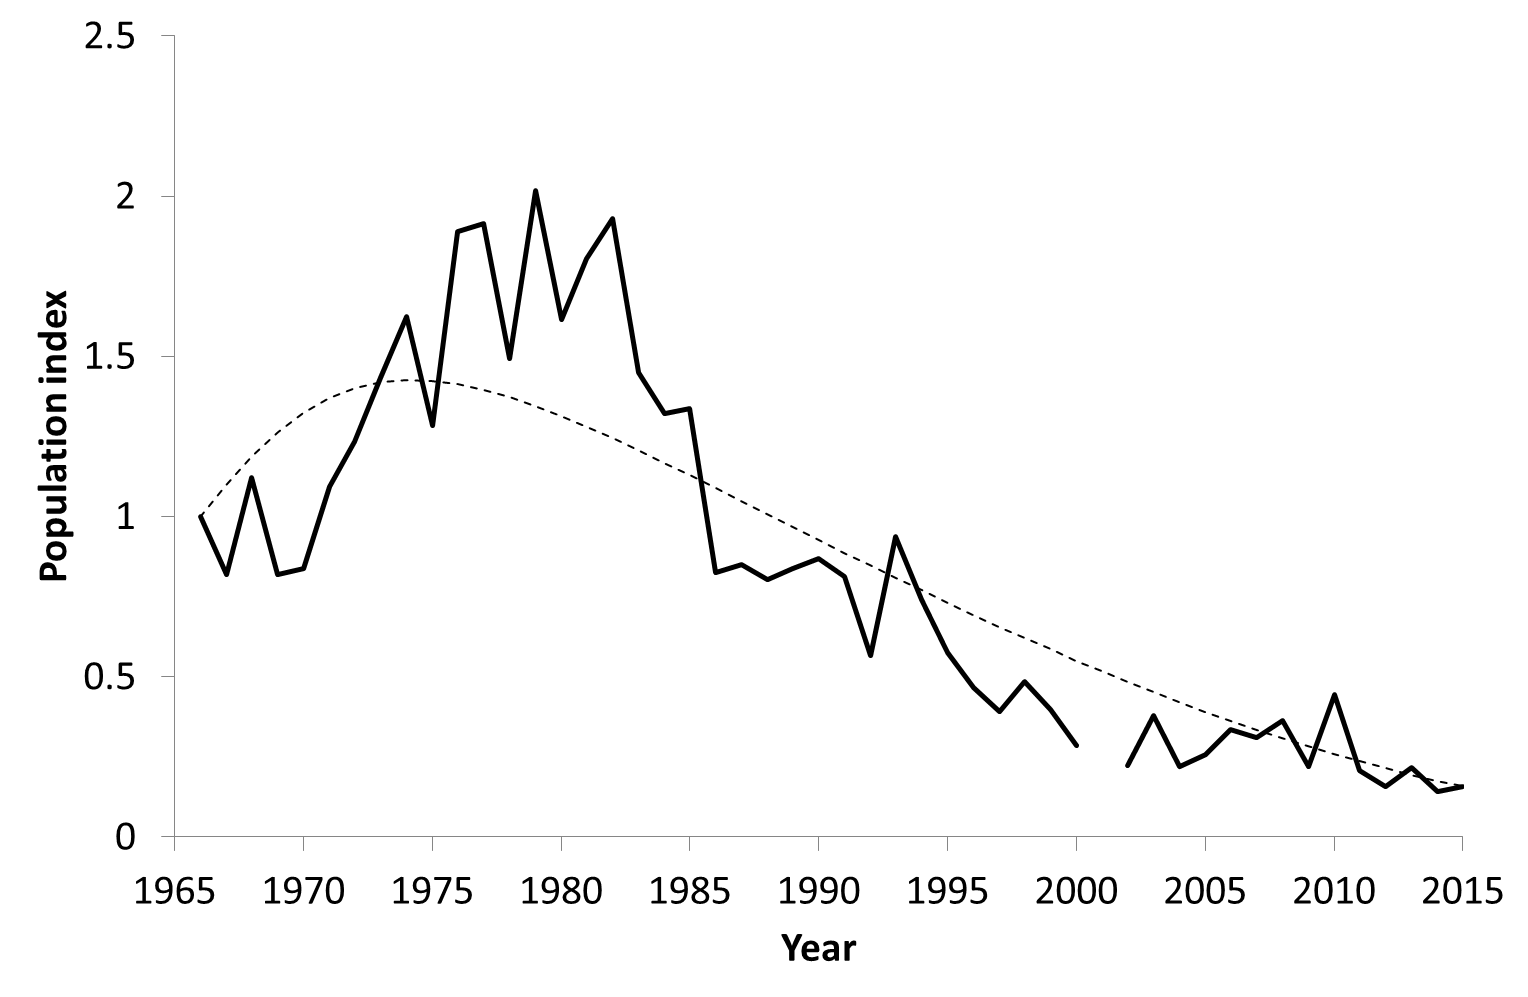


Linnet


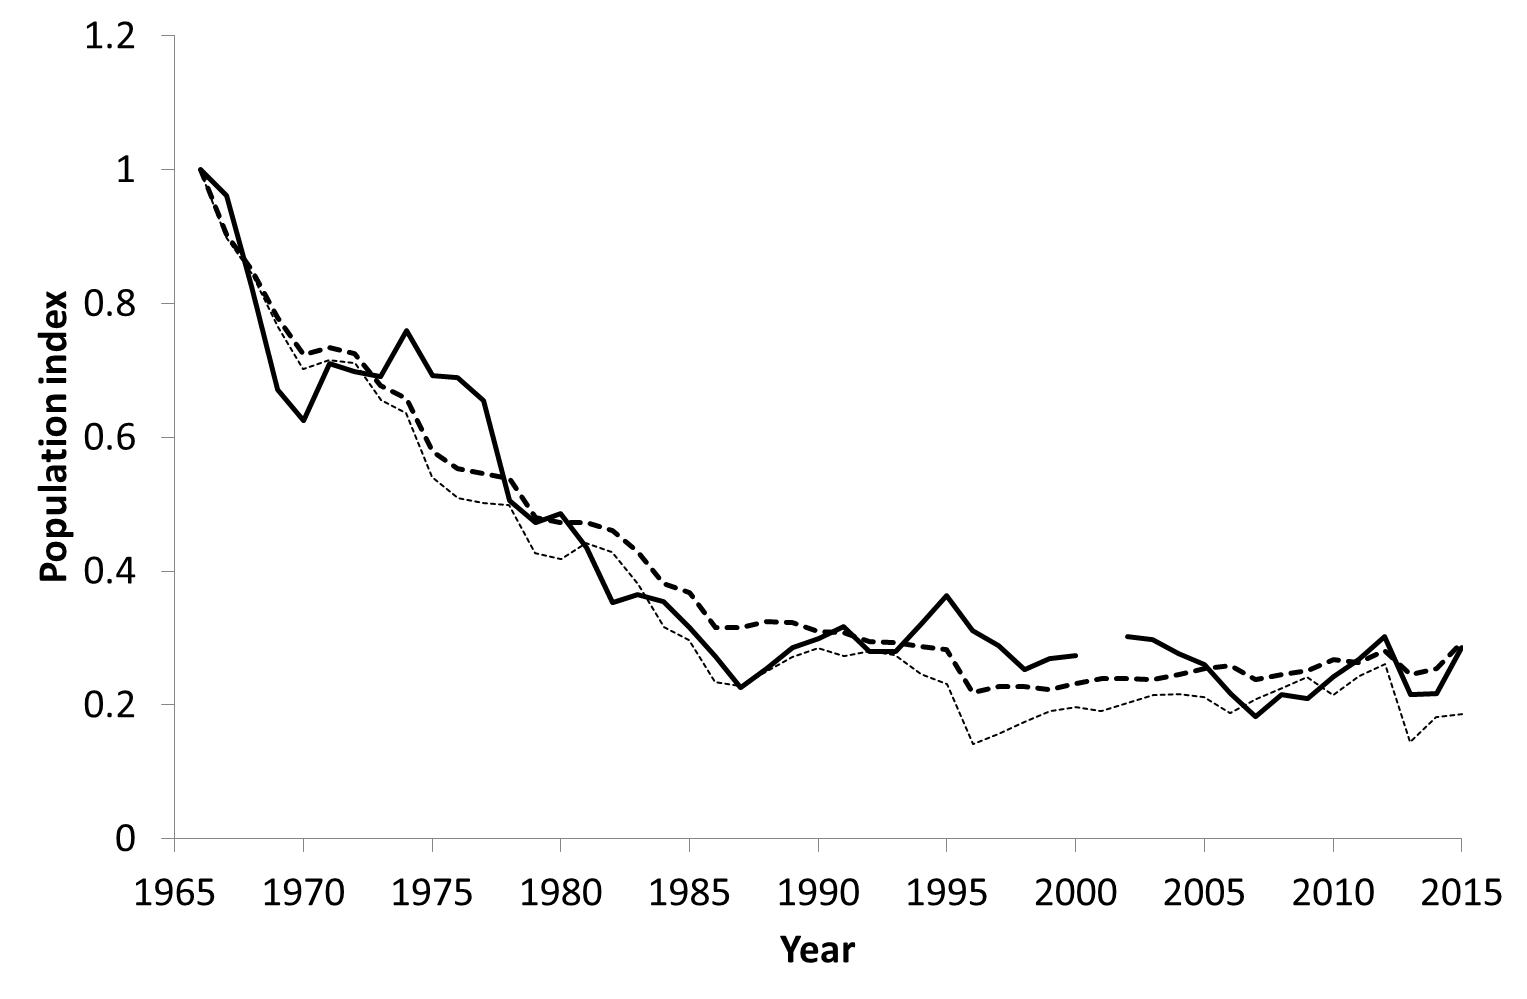


Little owl


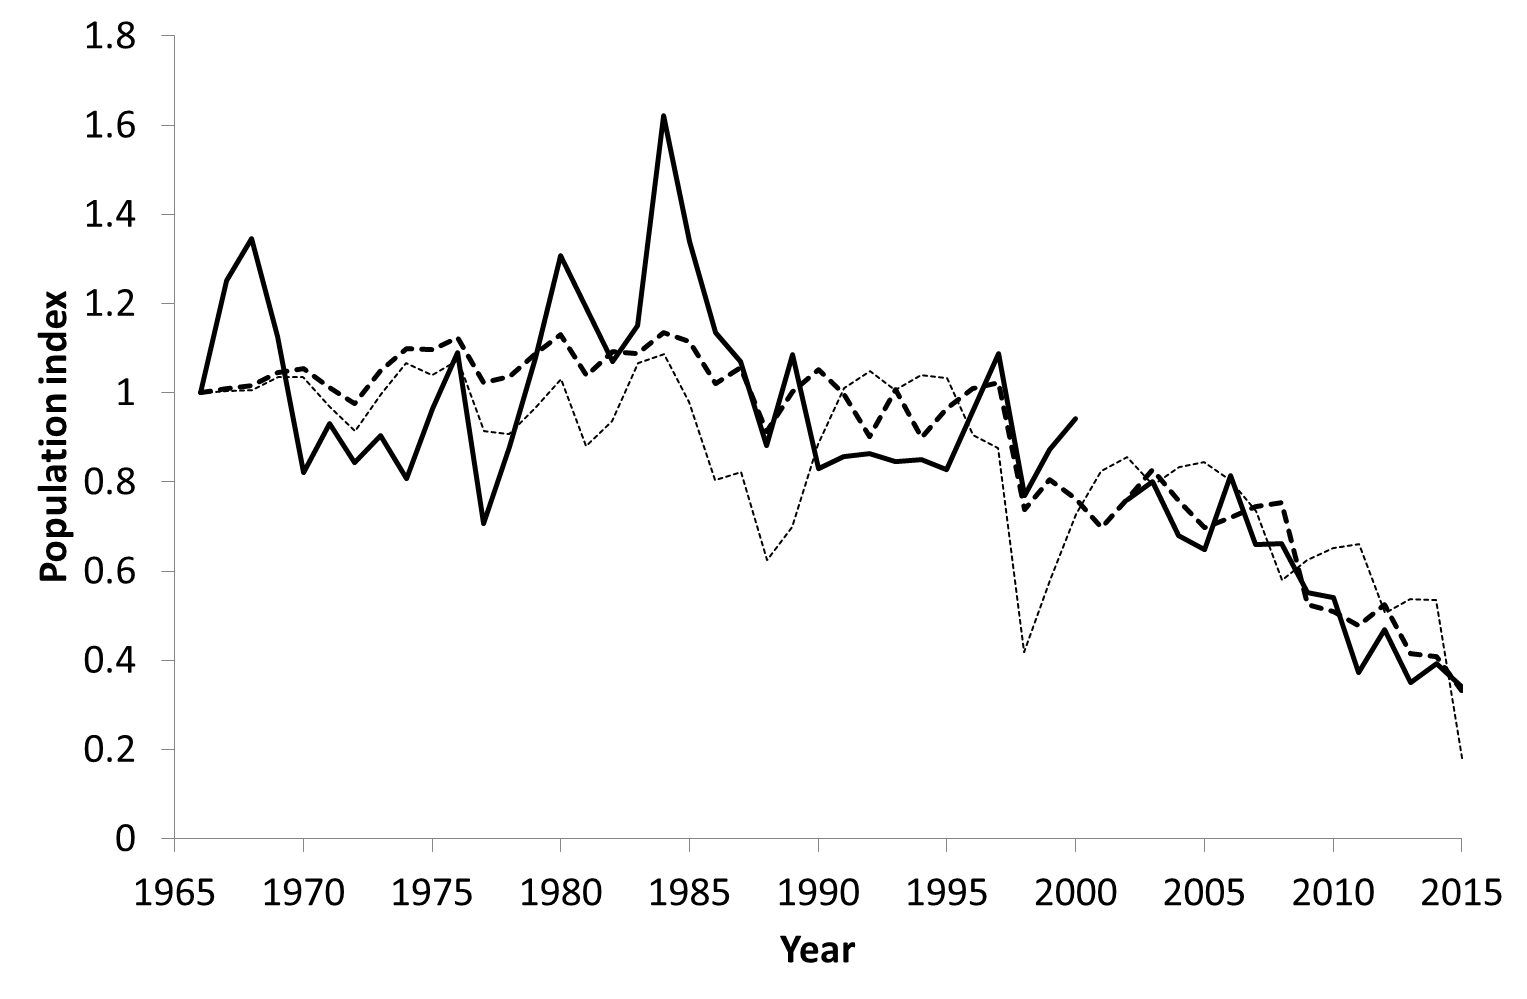


Long-tailed tit


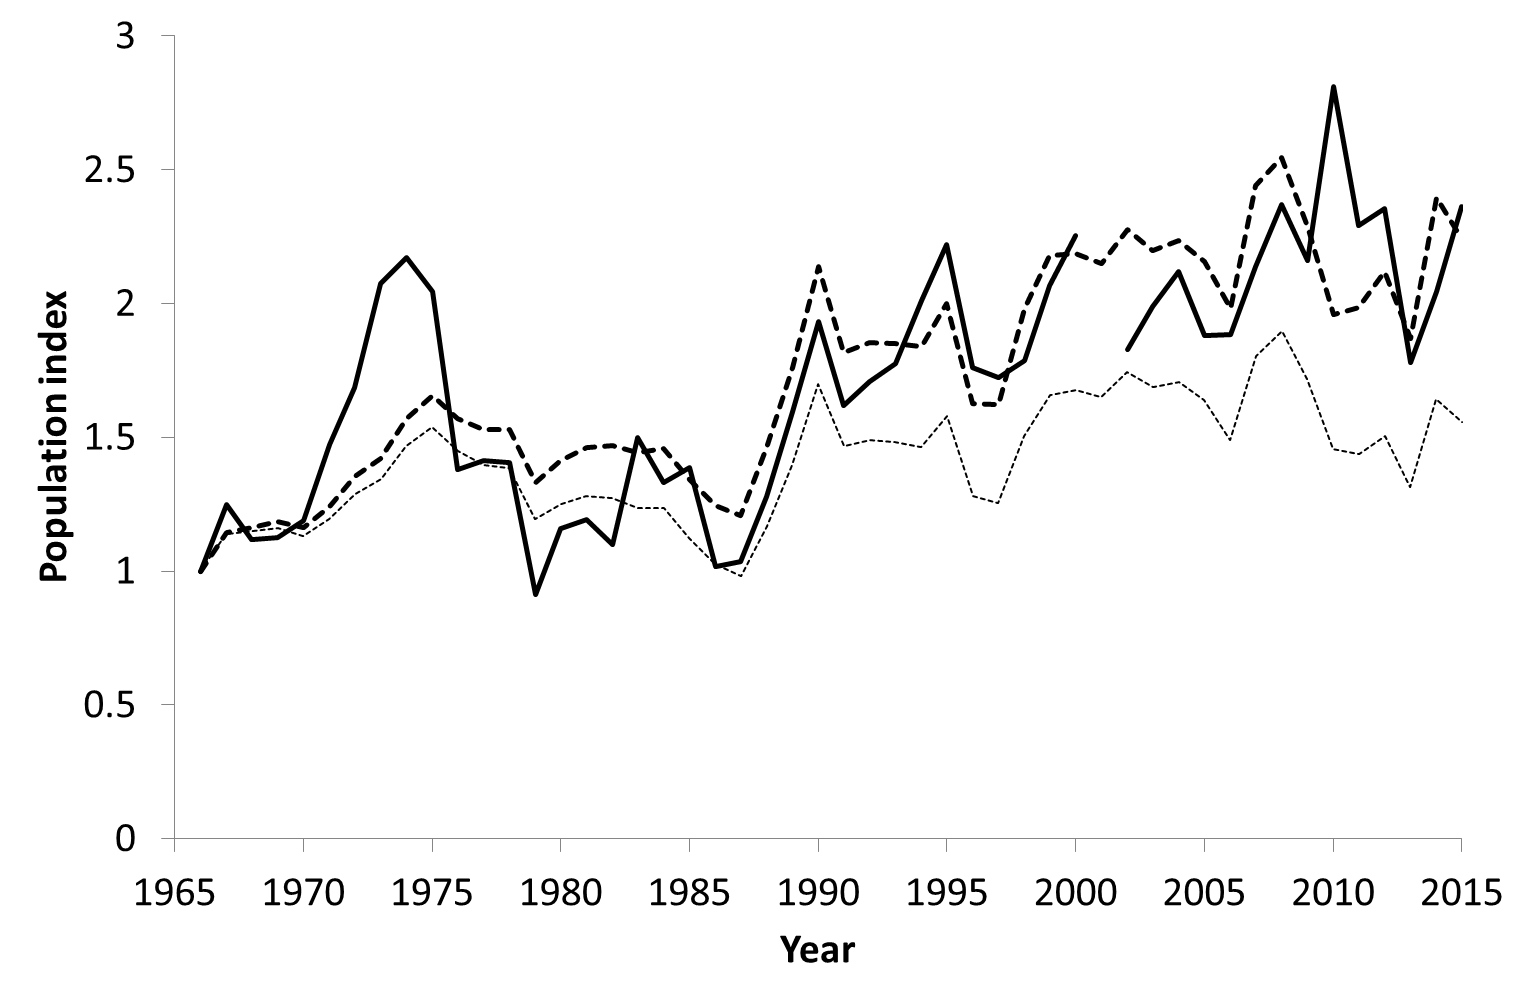


Magpie


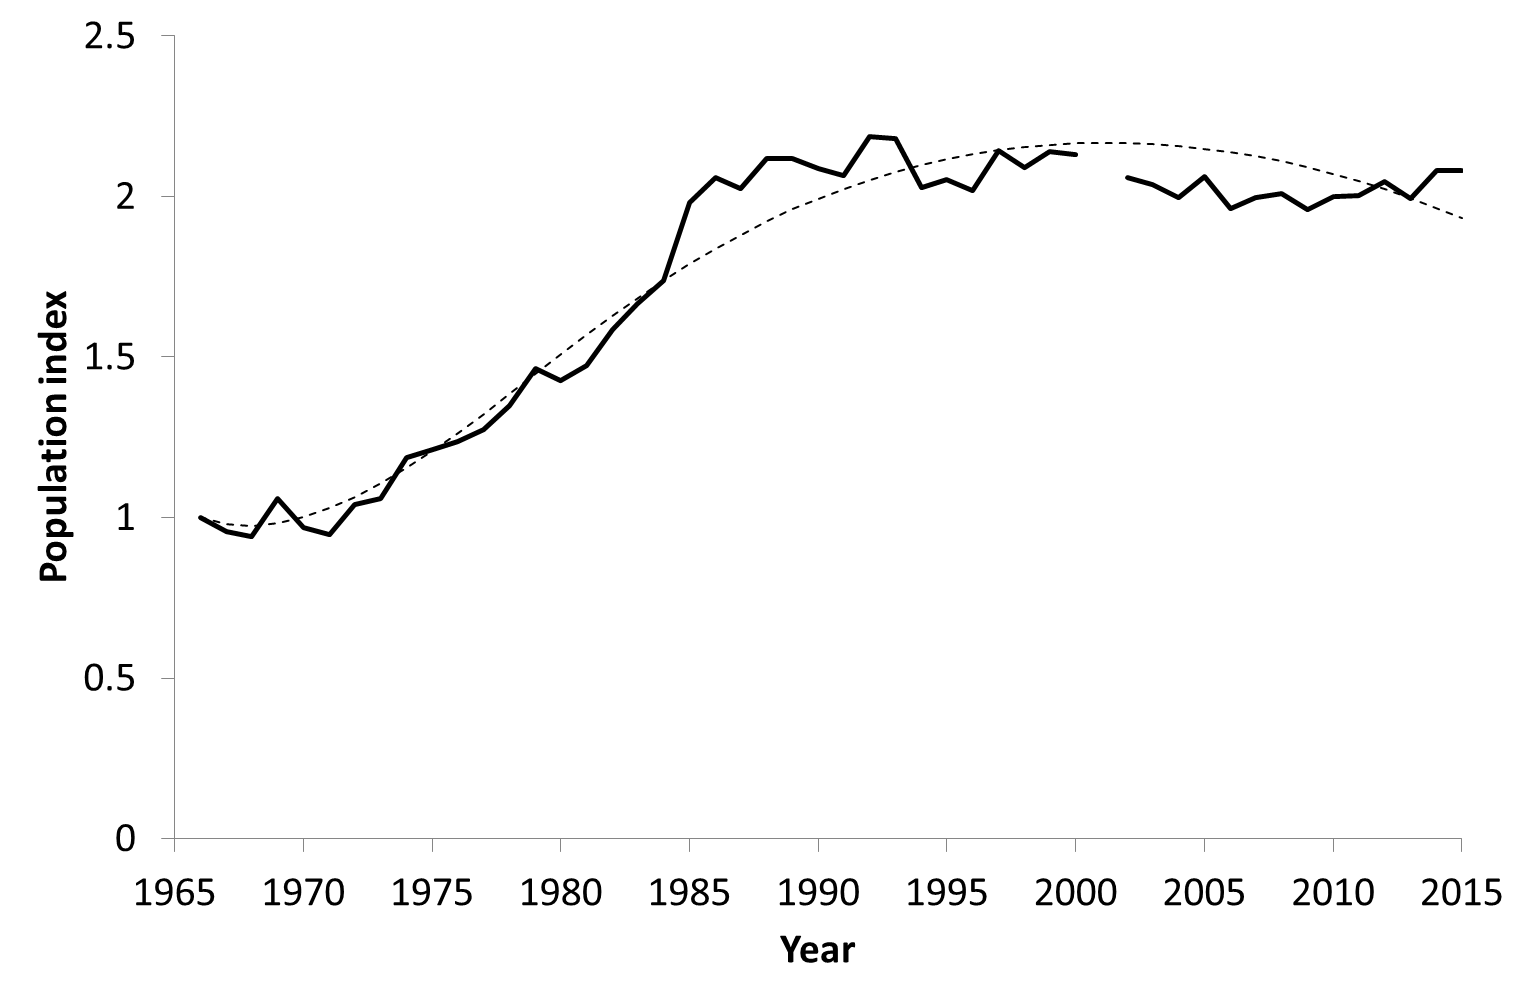


Mallard


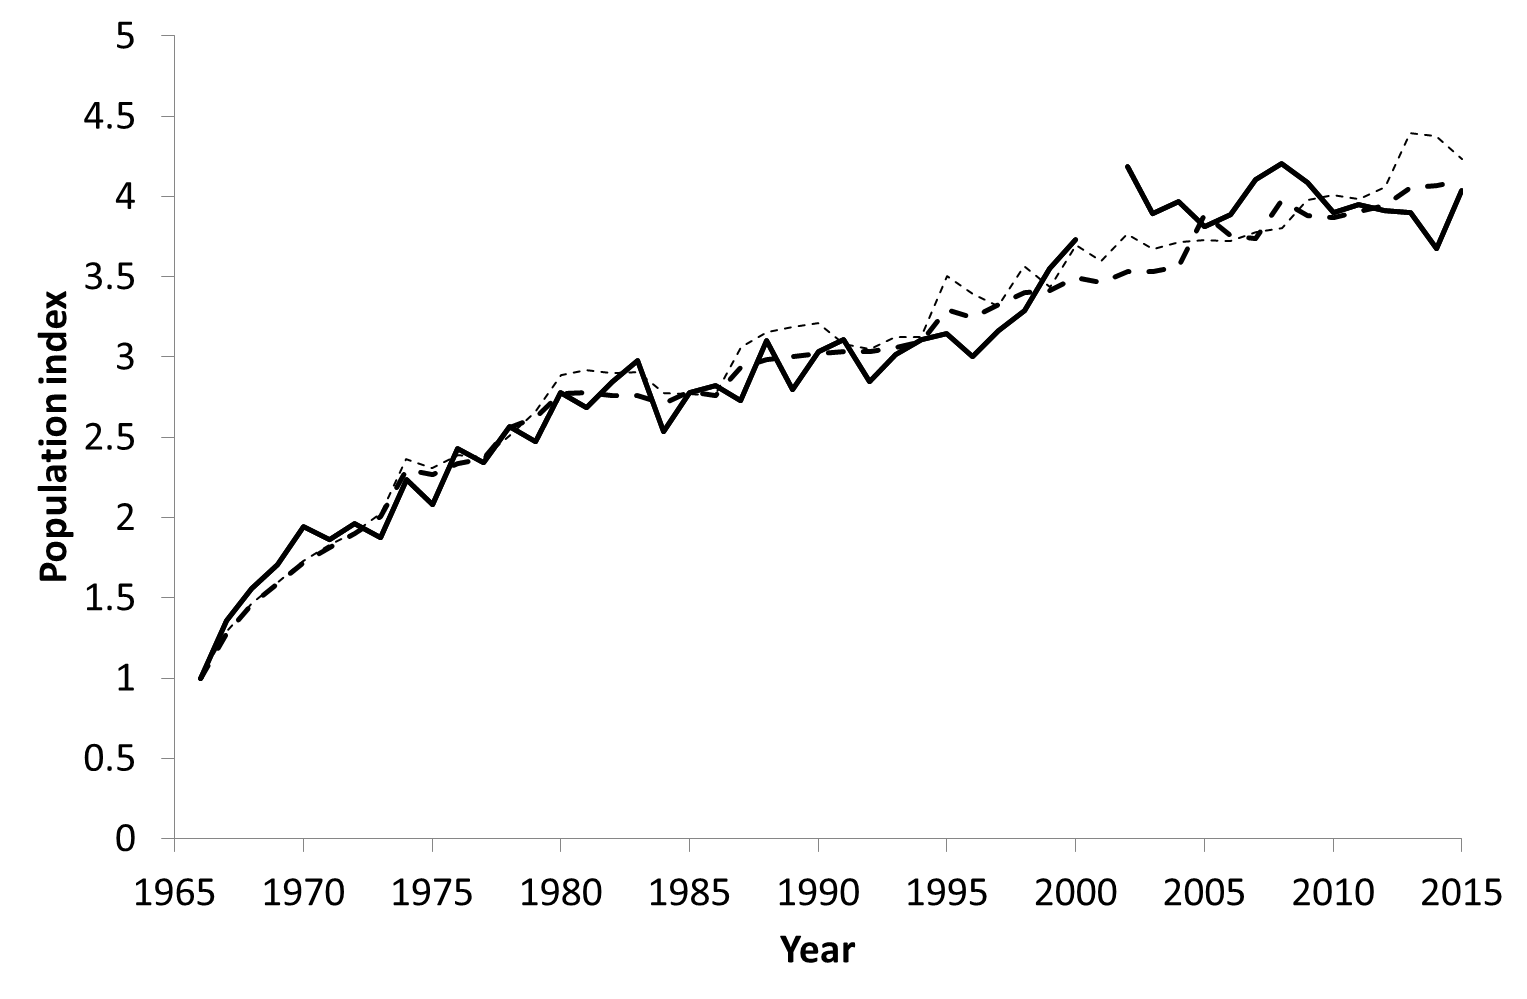


Marsh tit


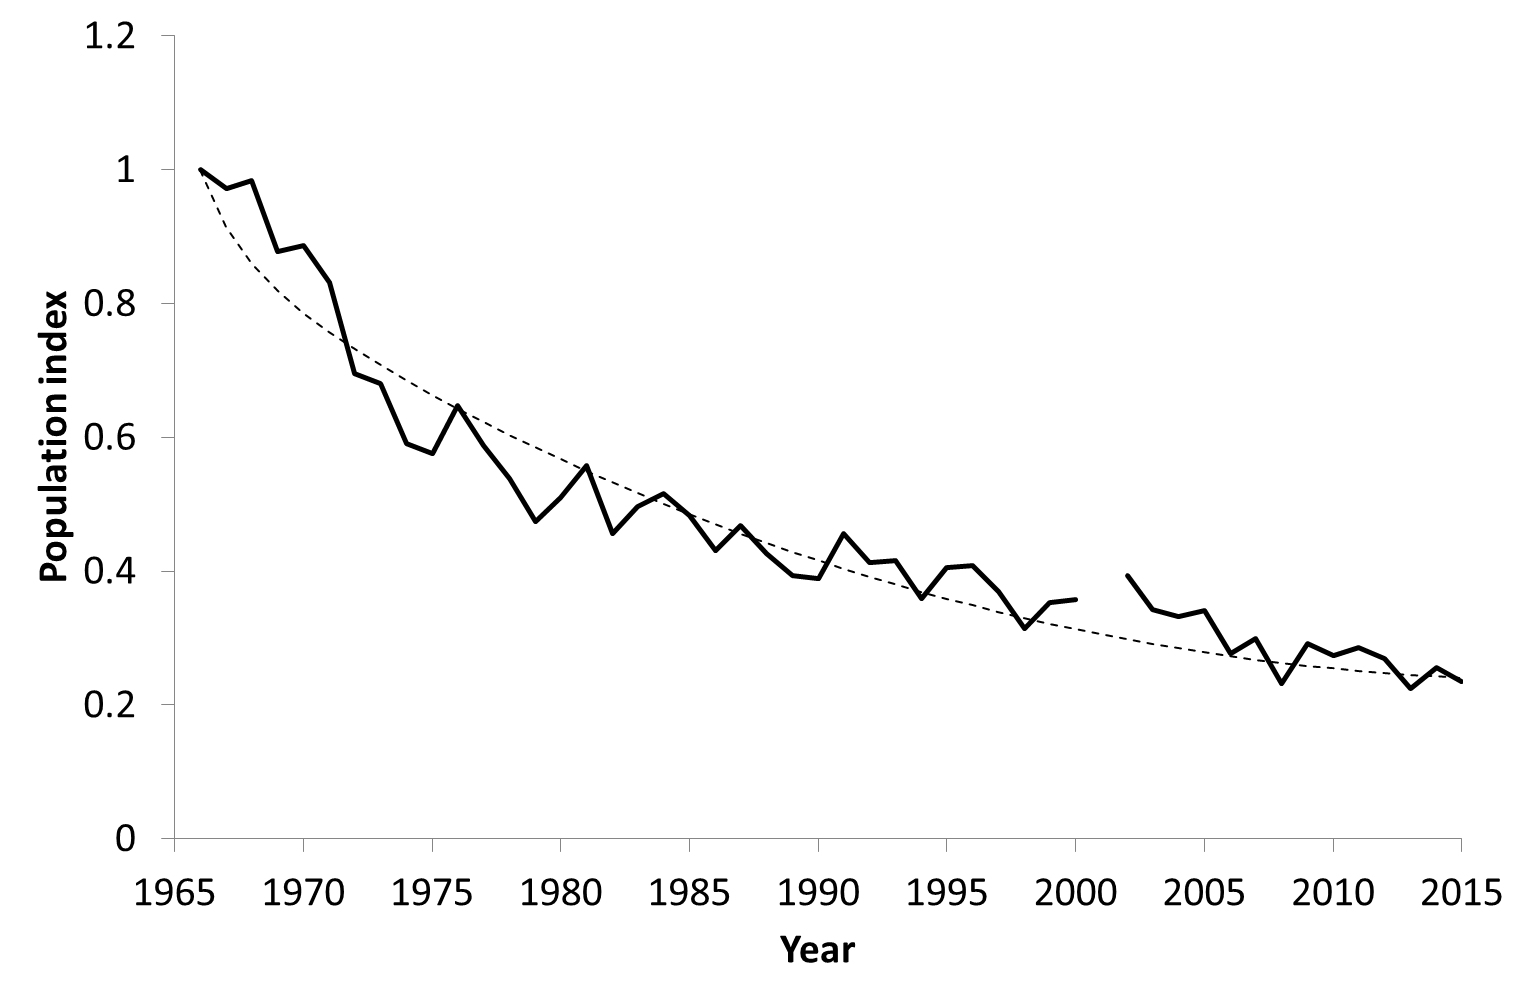


Meadow pipit


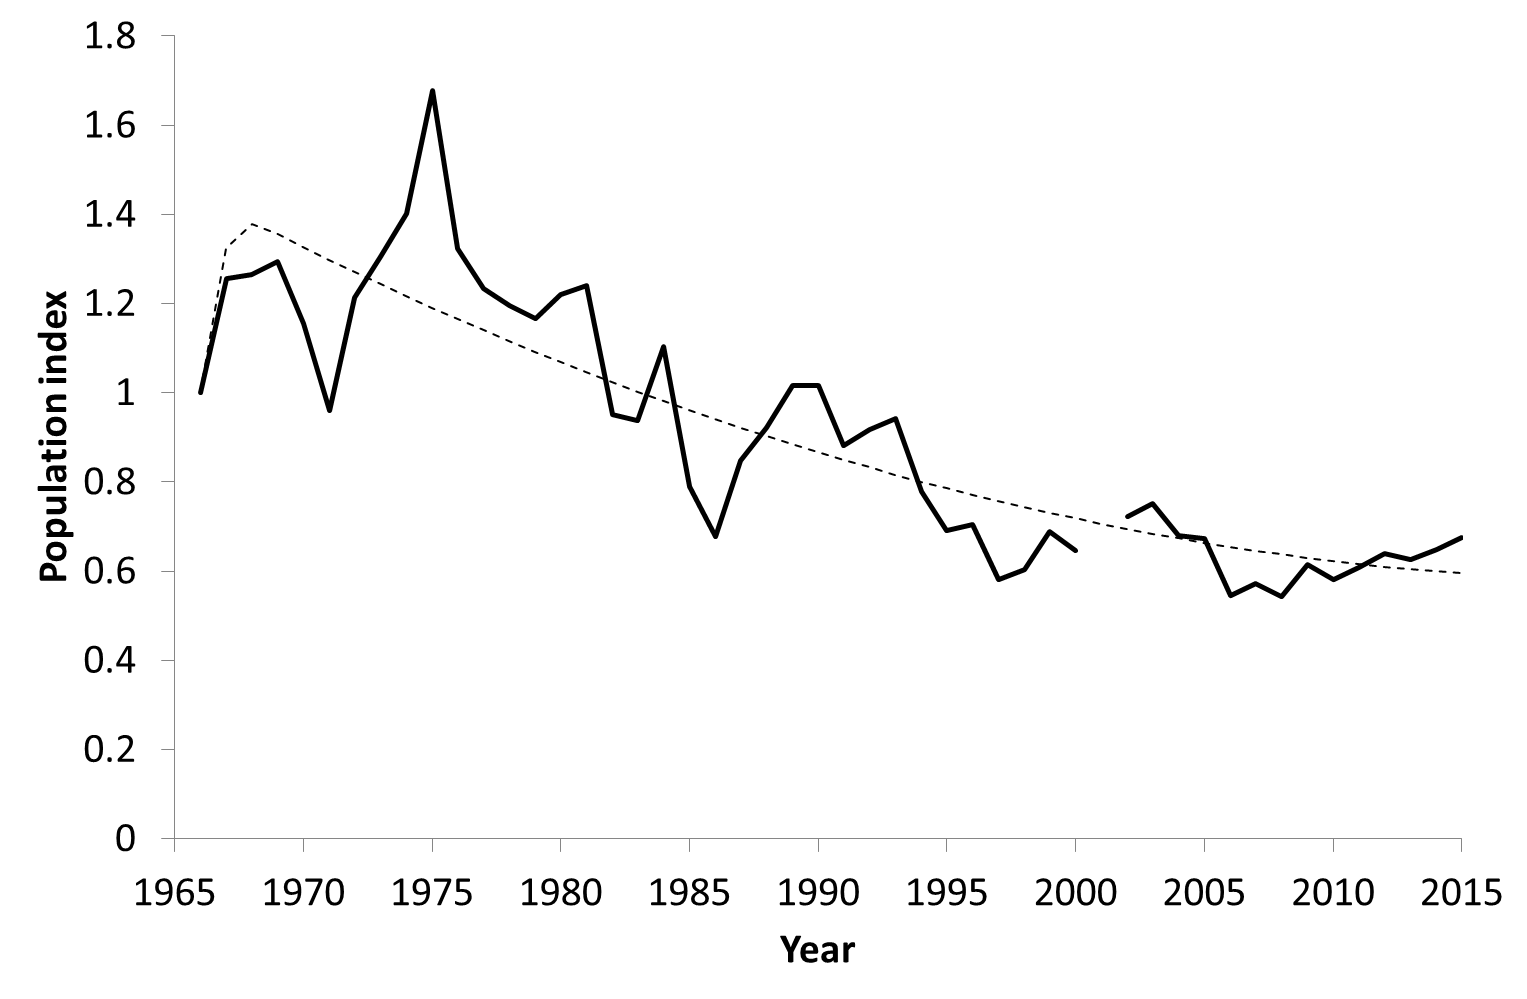


Mistle thrush


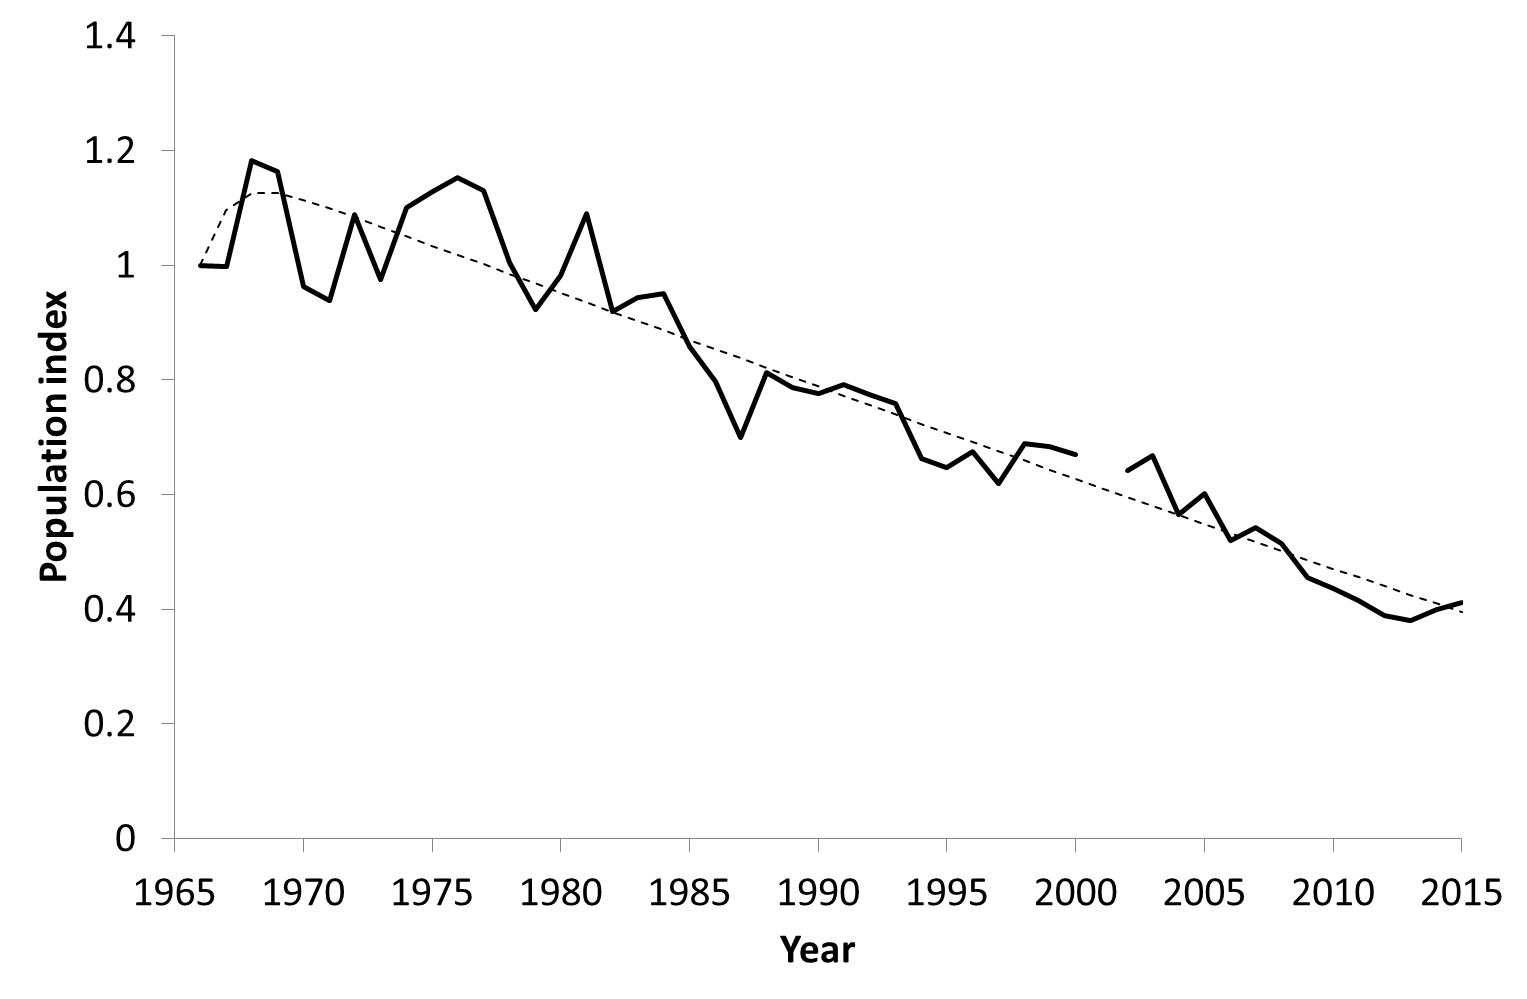


Moorhen


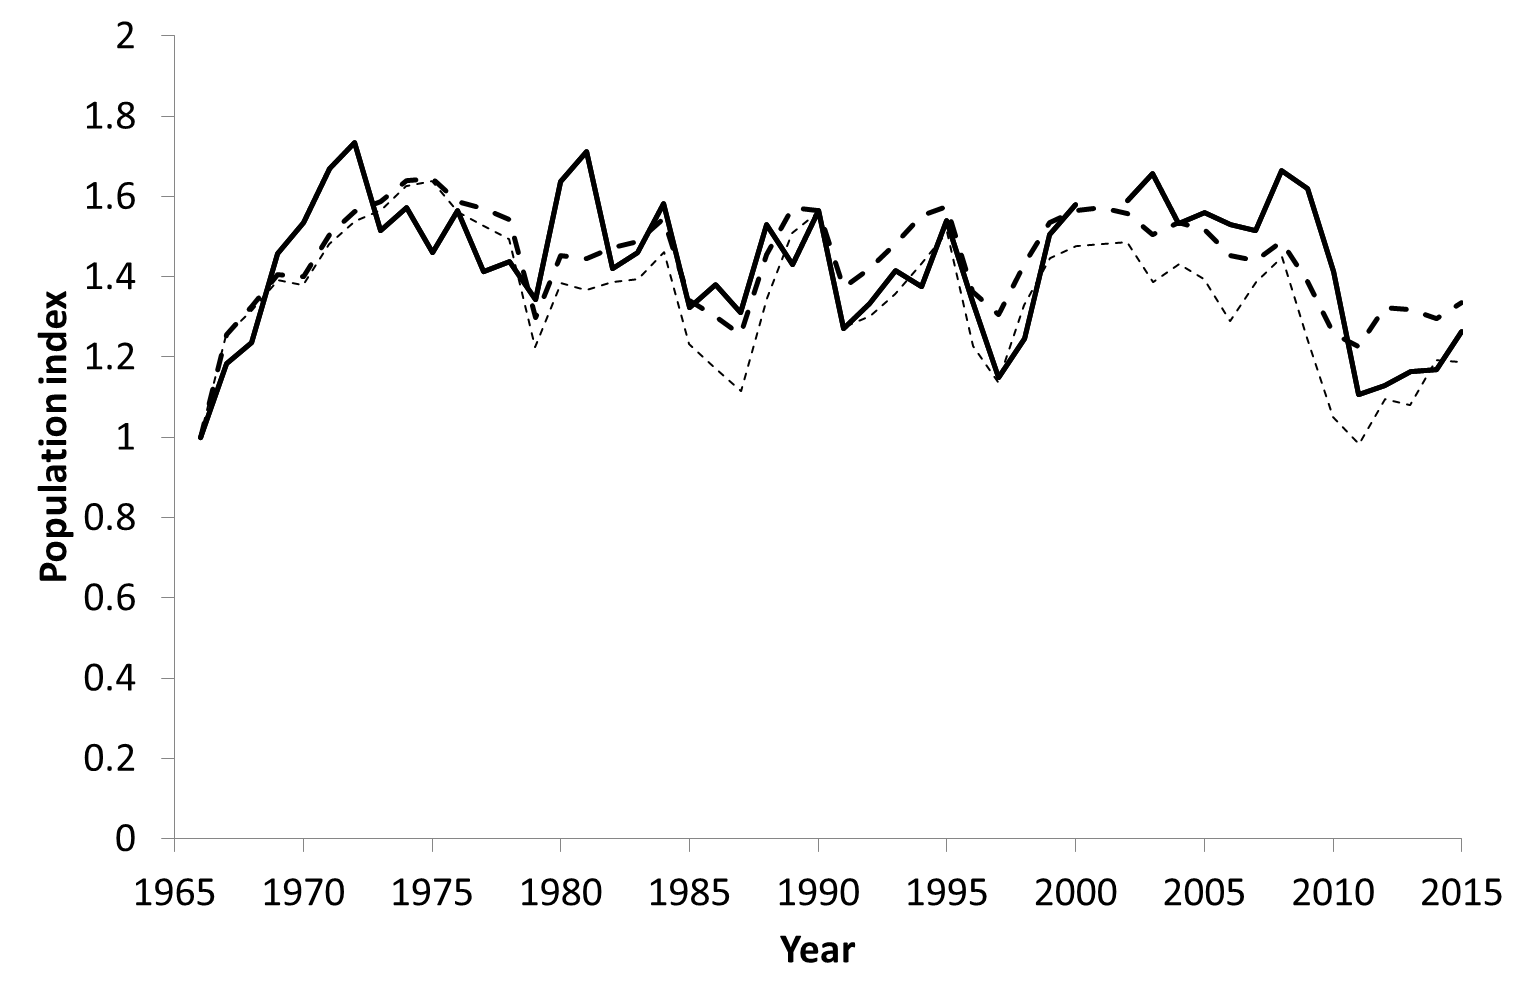


Mute swan


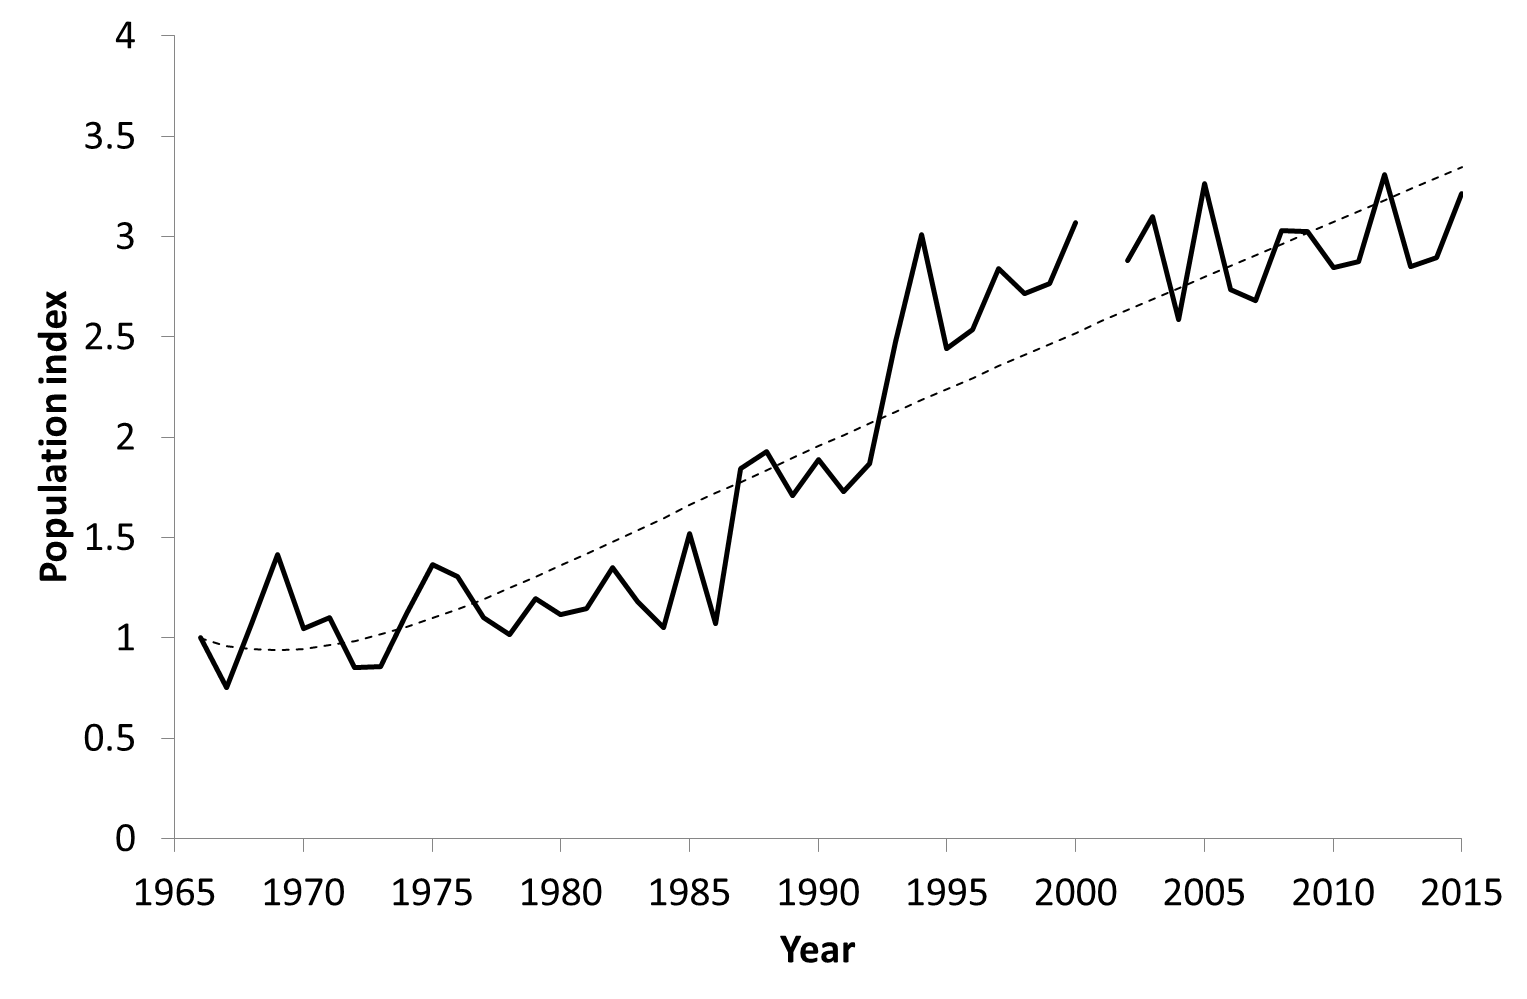


Nightingale


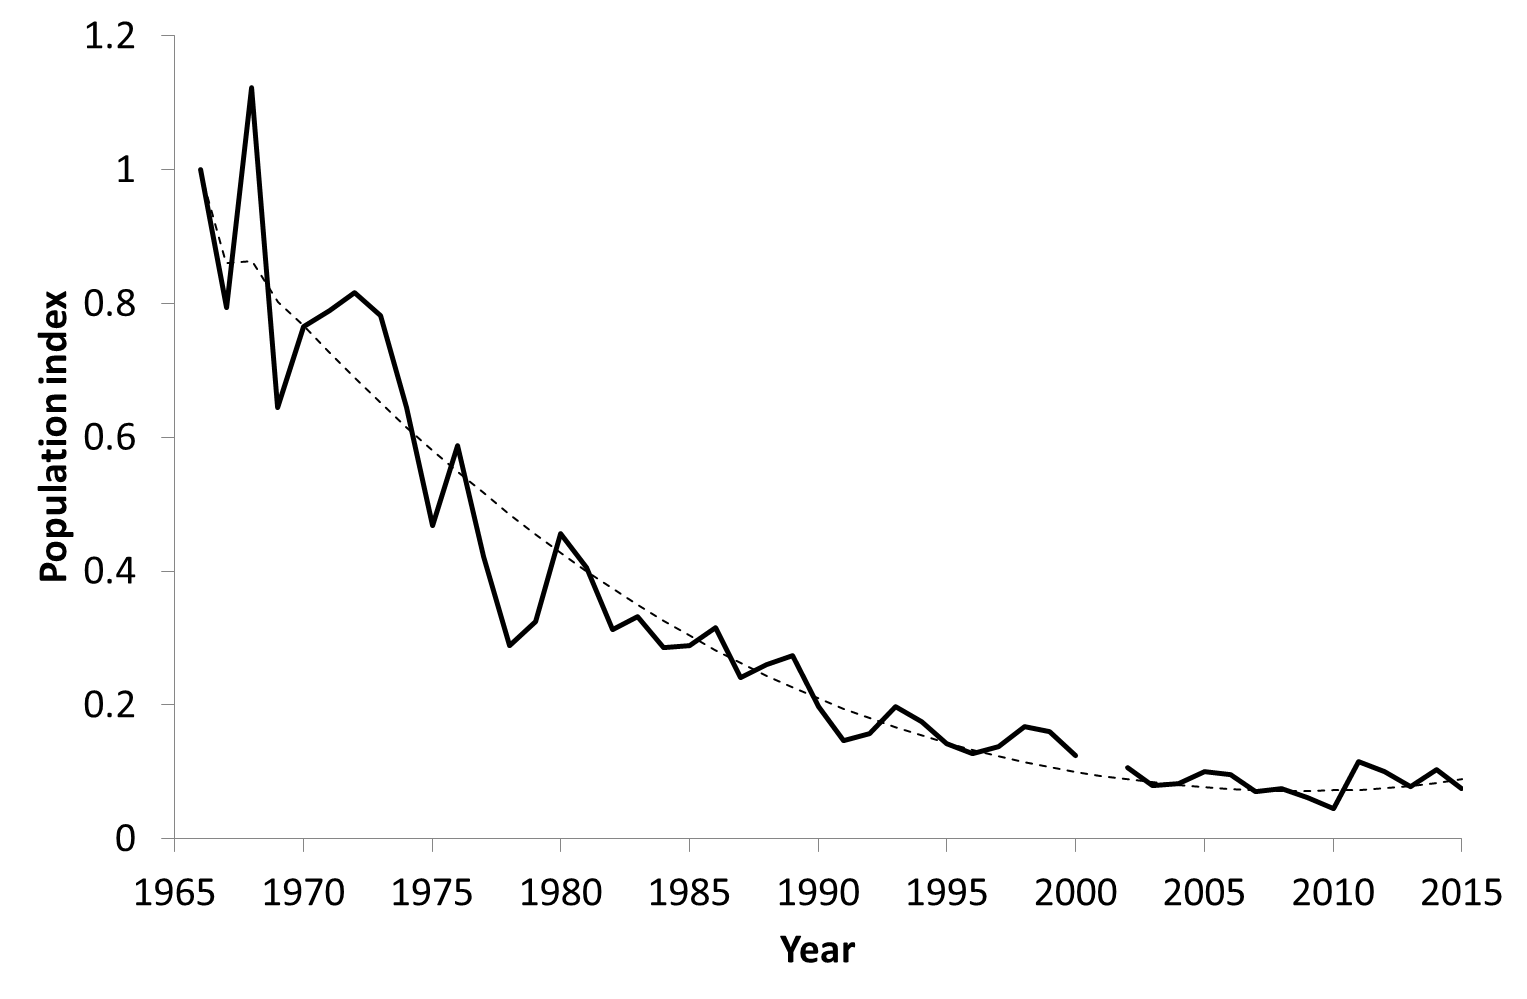


Nuthatch


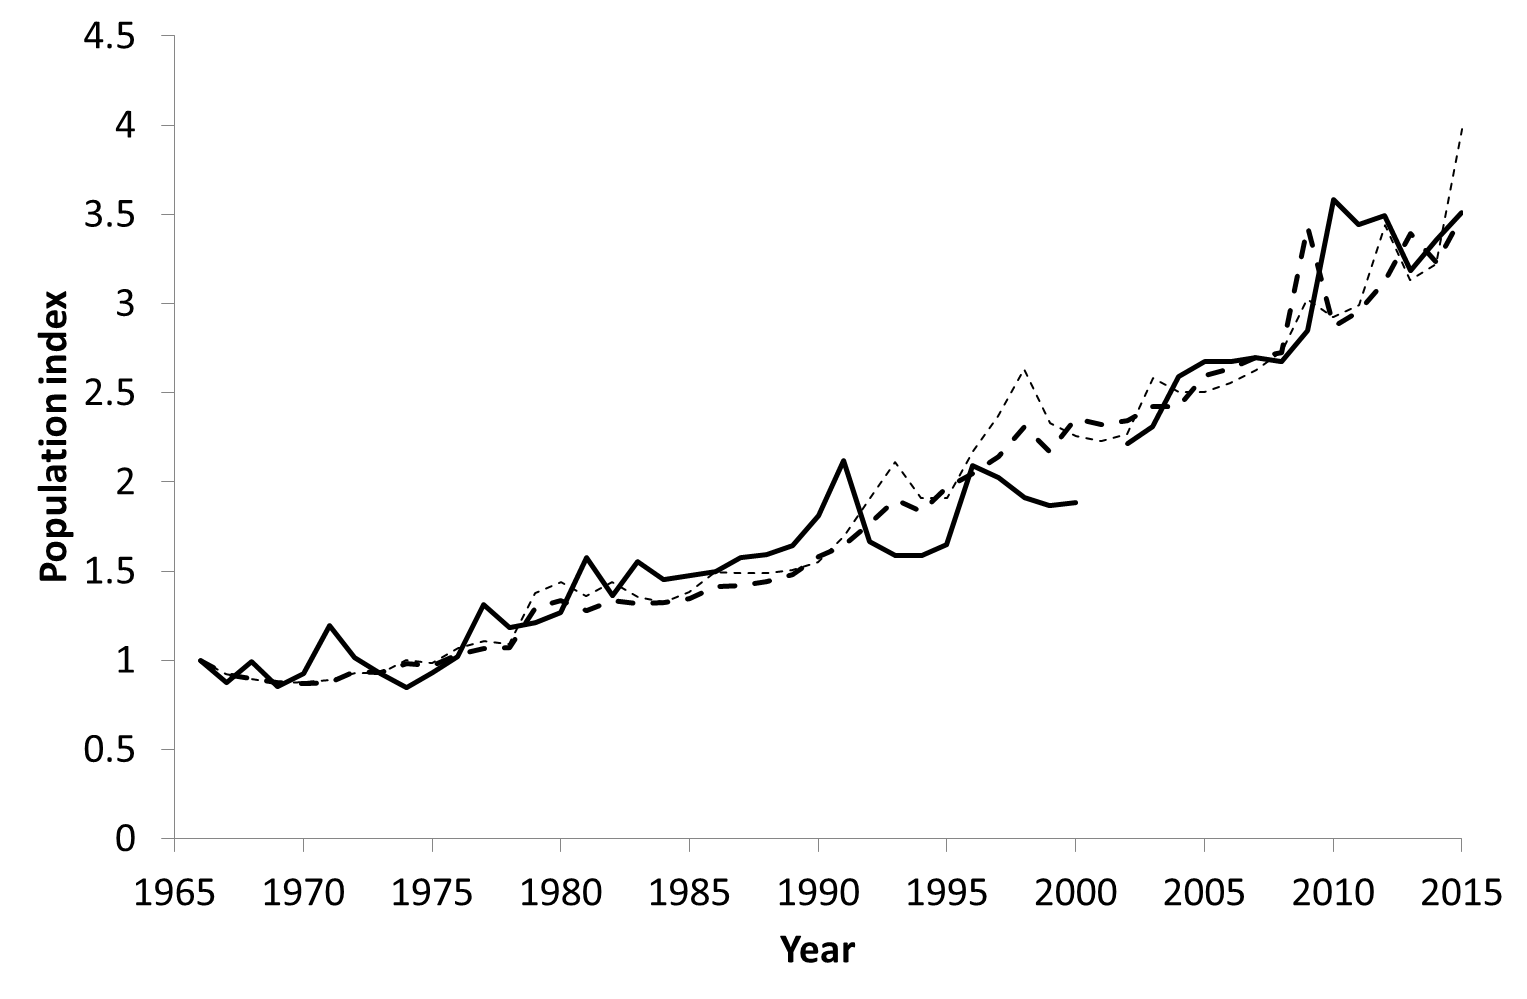


Pheasant


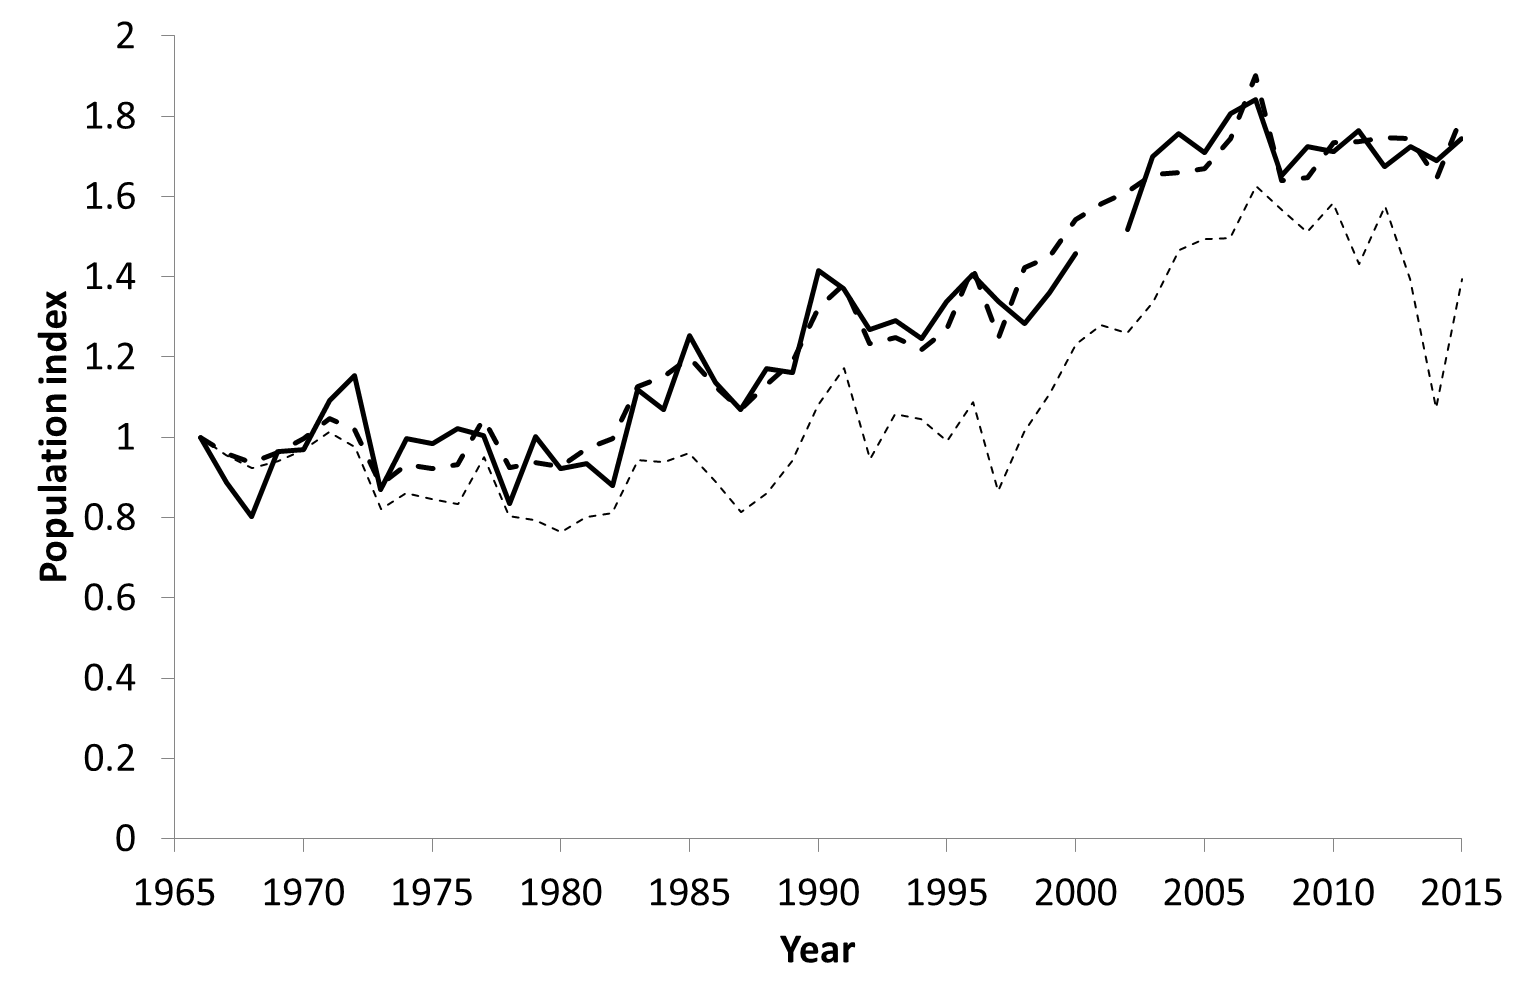


Pied wagtail


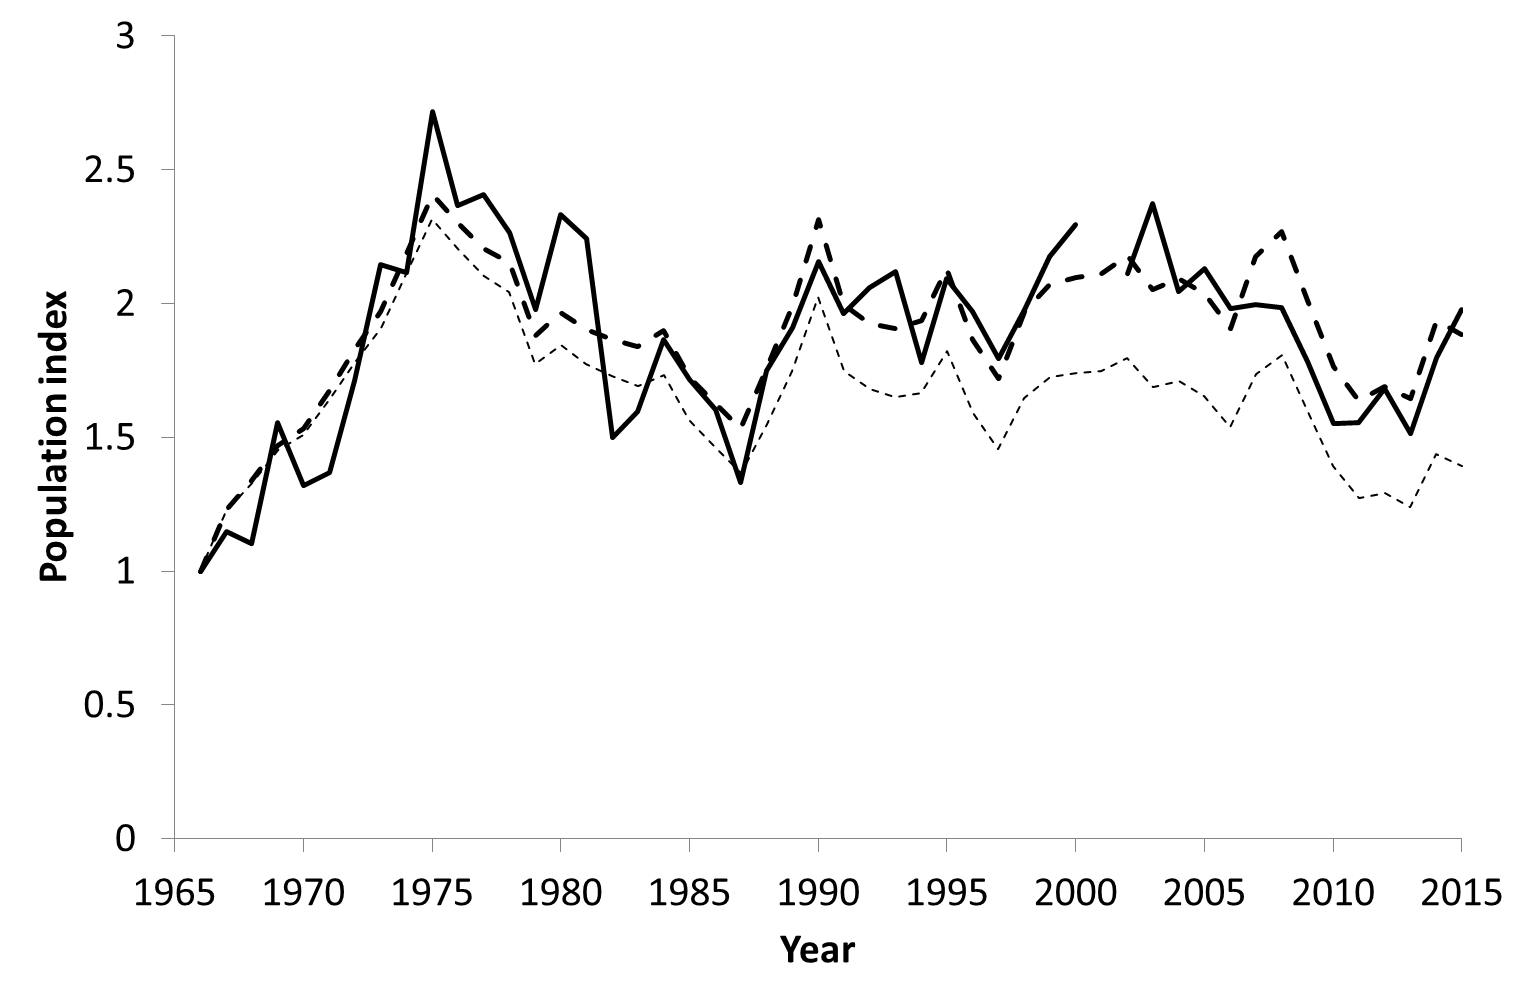


Redstart


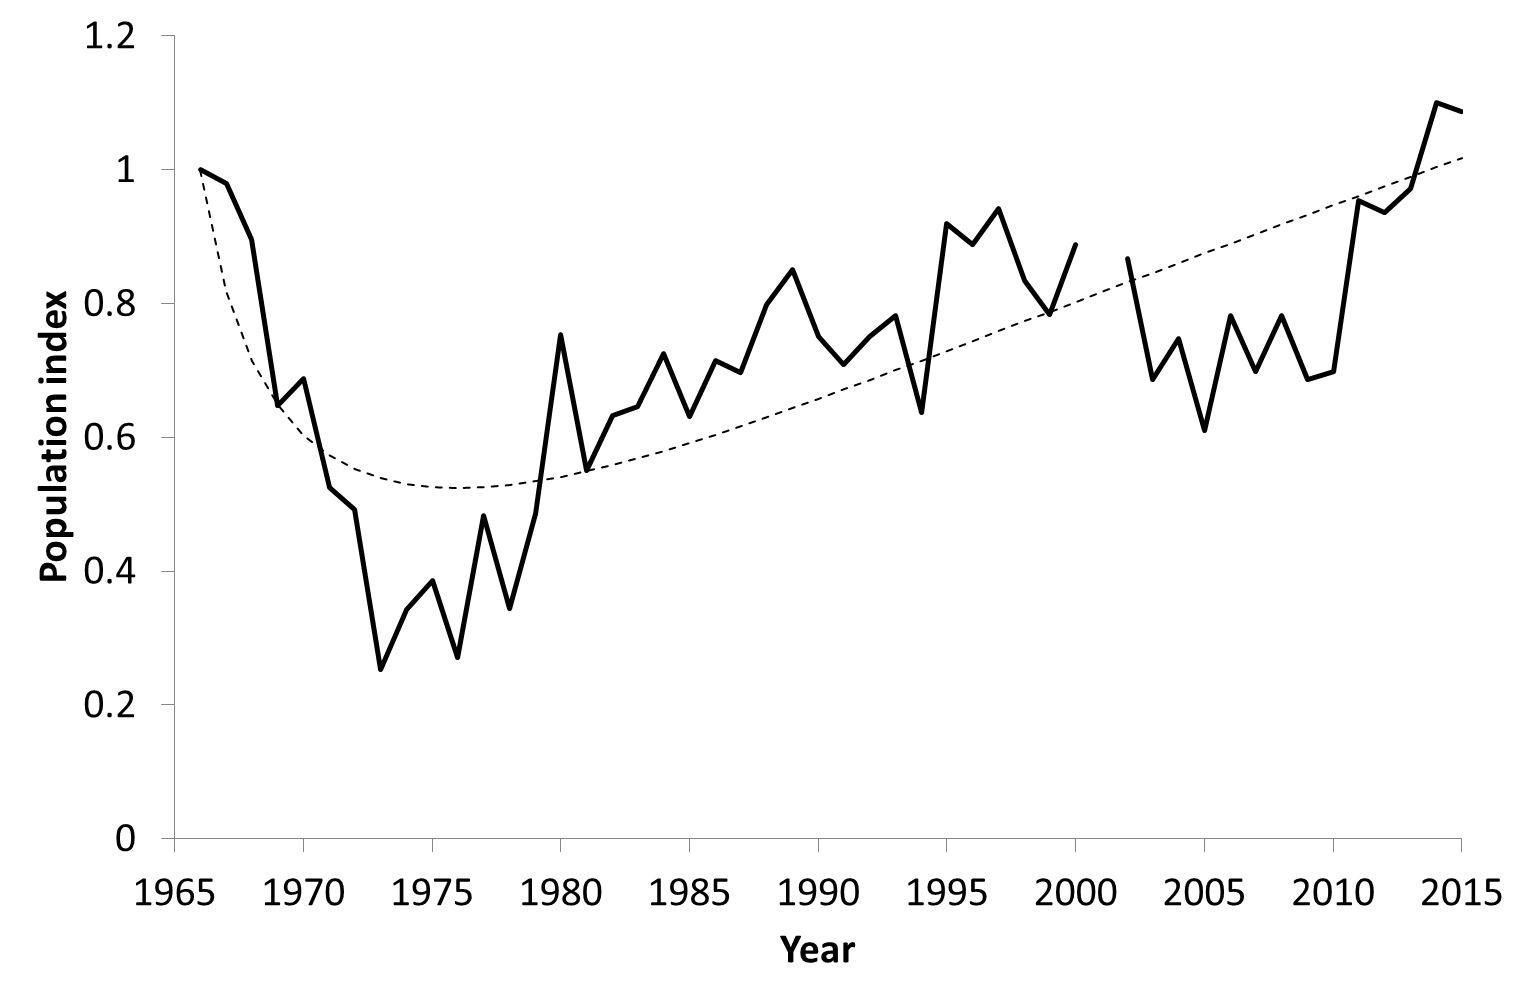


Reed bunting


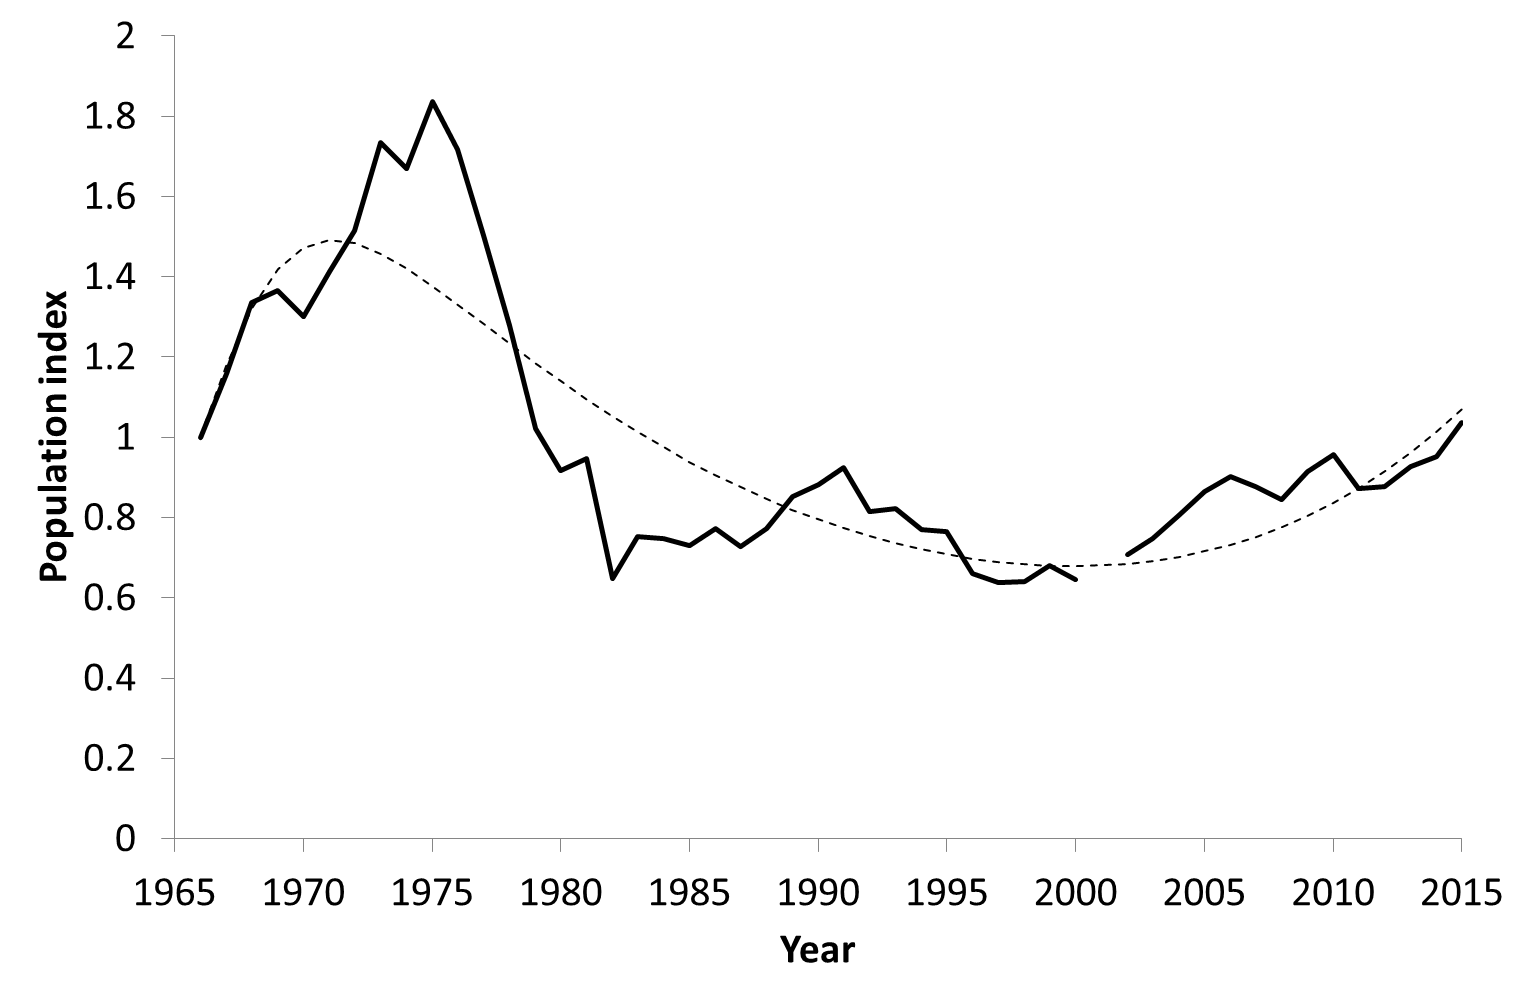


Reed warbler


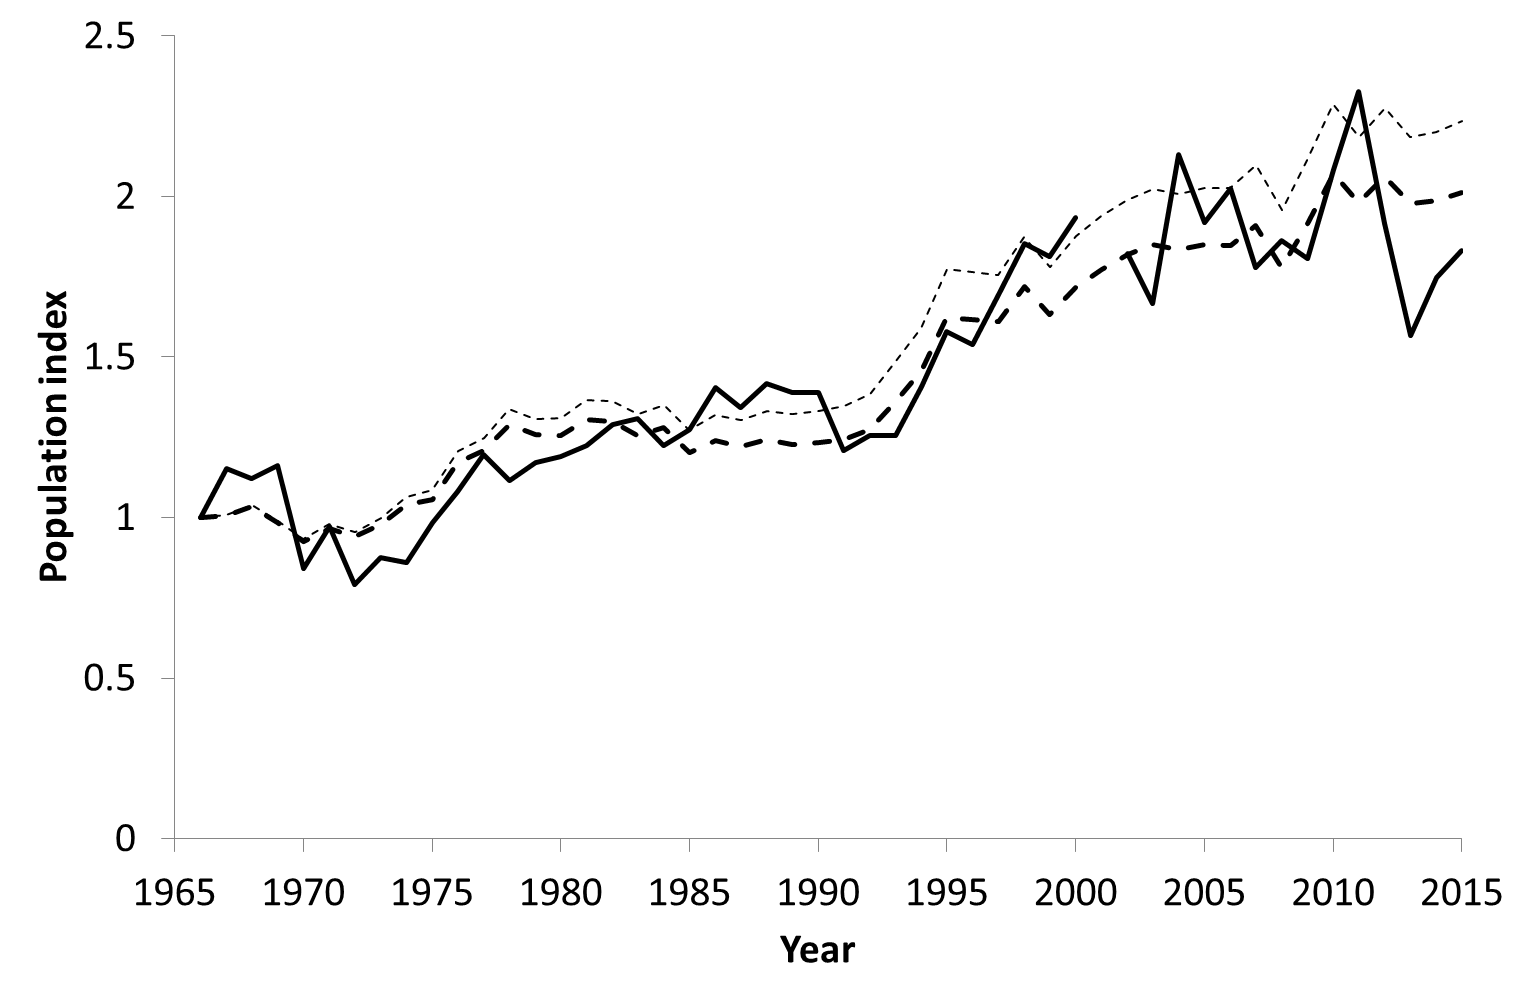


Red-legged partridge


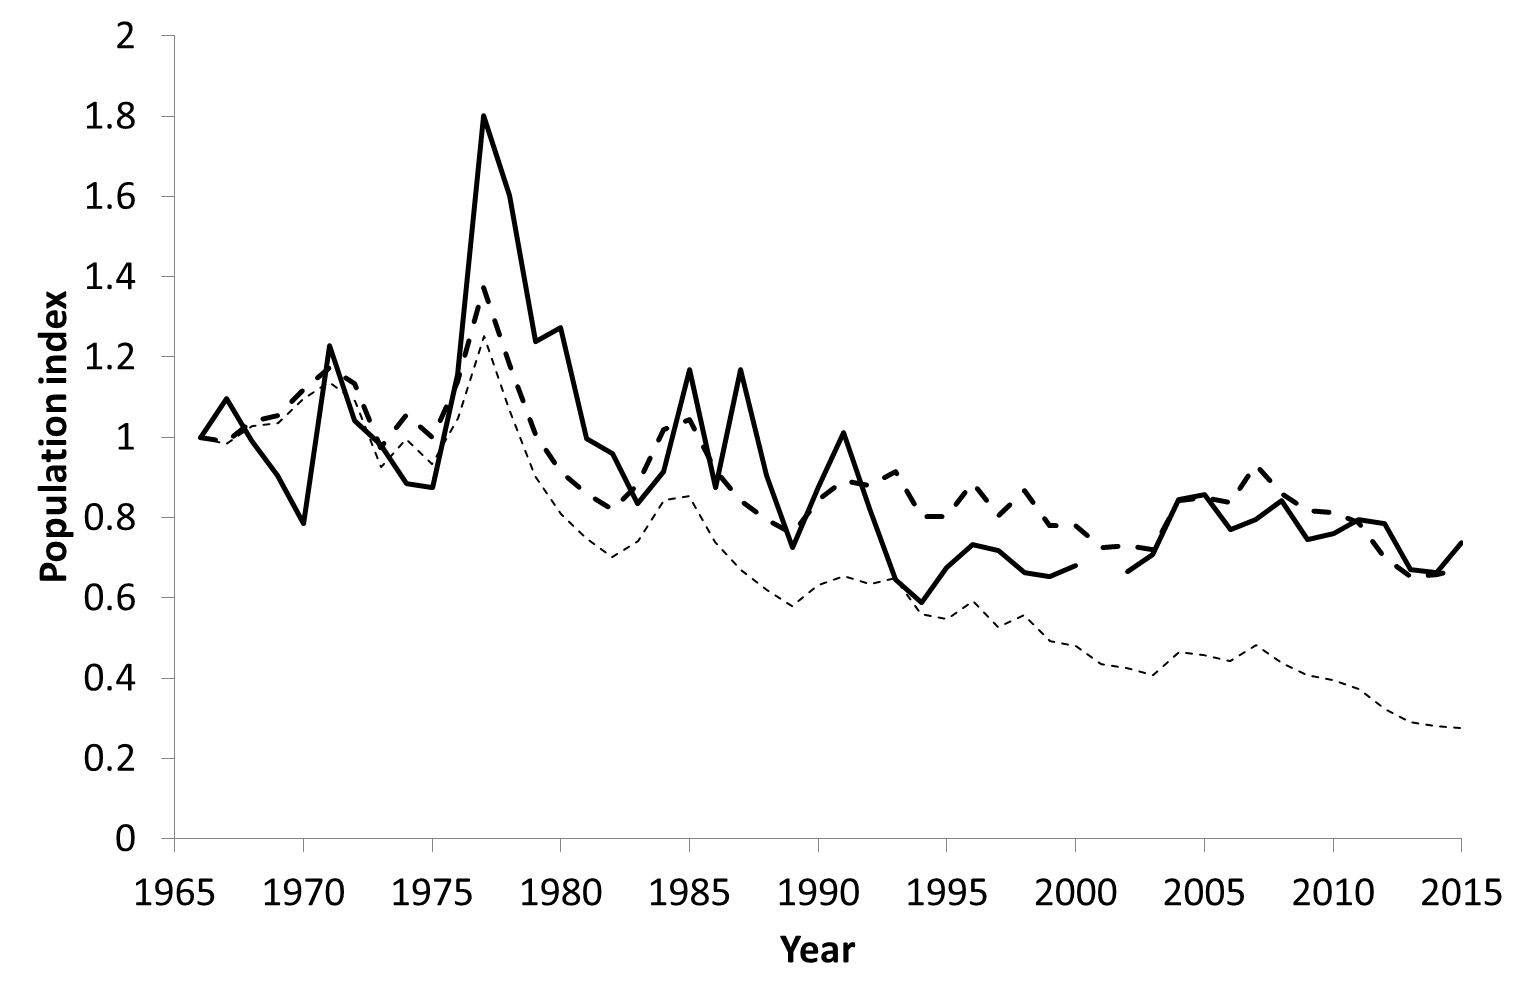


Robin


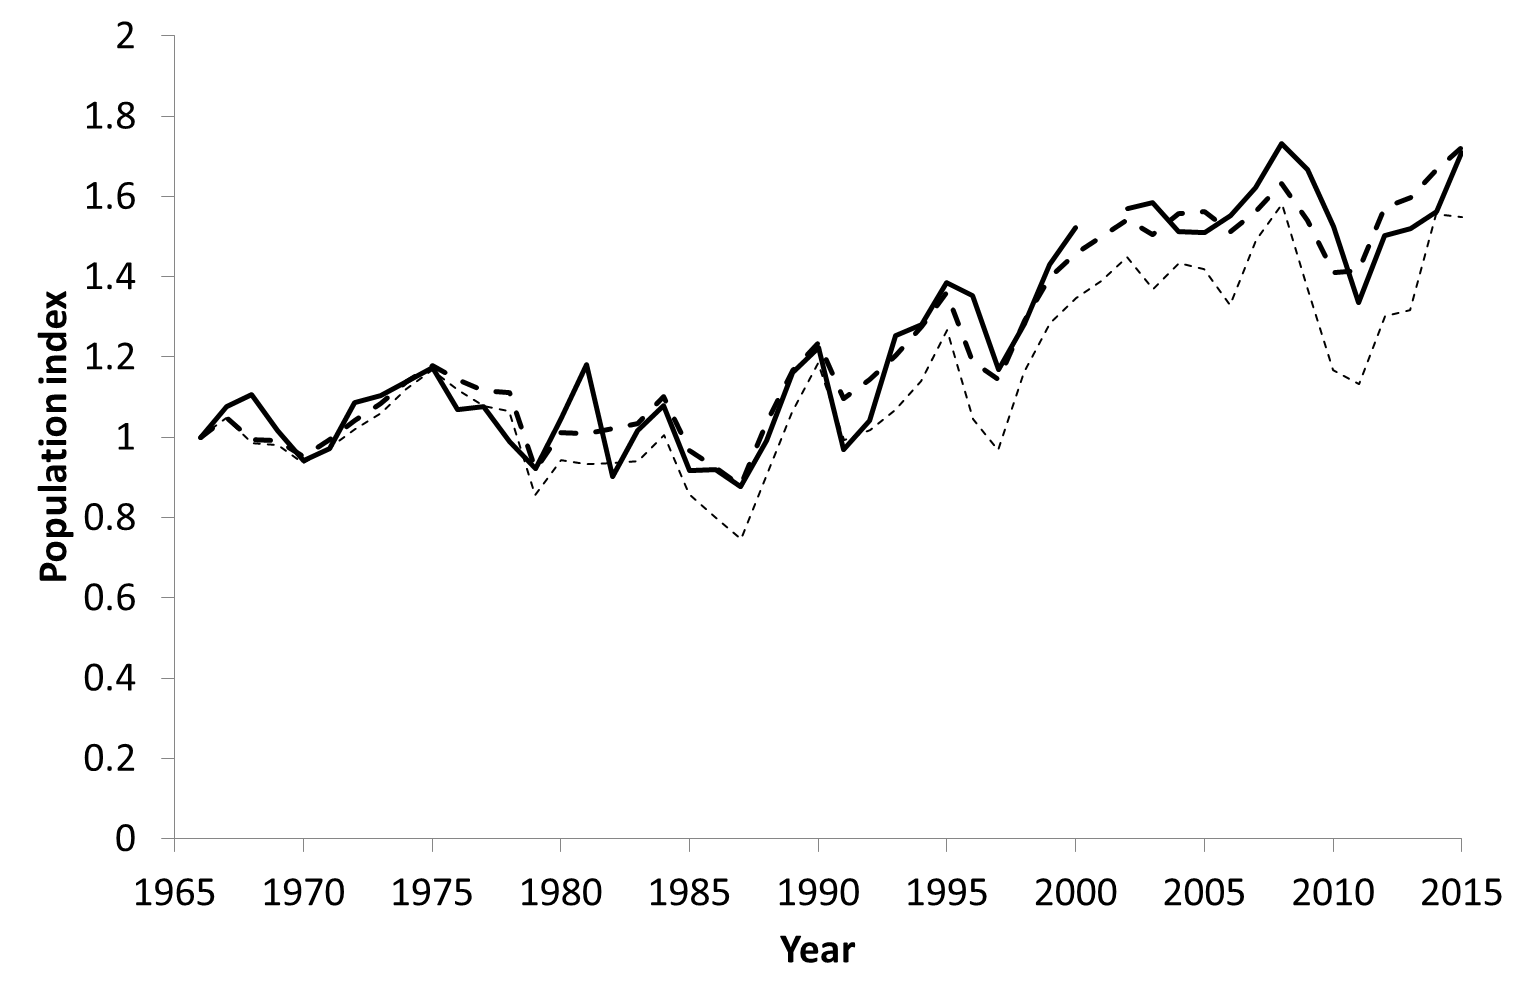


Sedge warbler


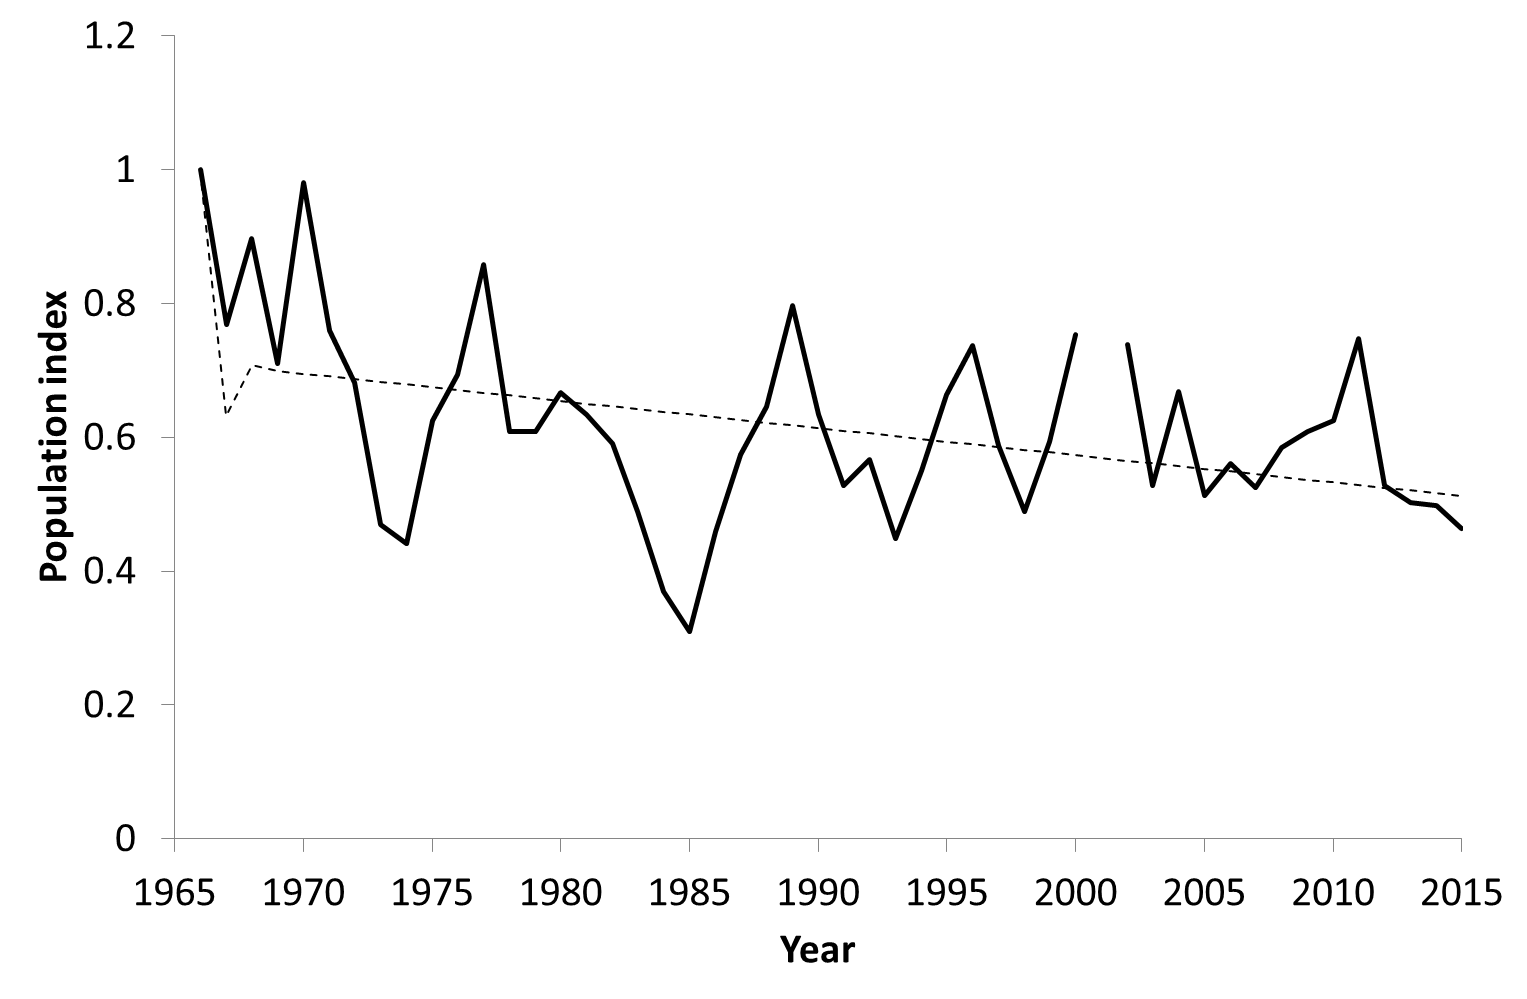


Skylark


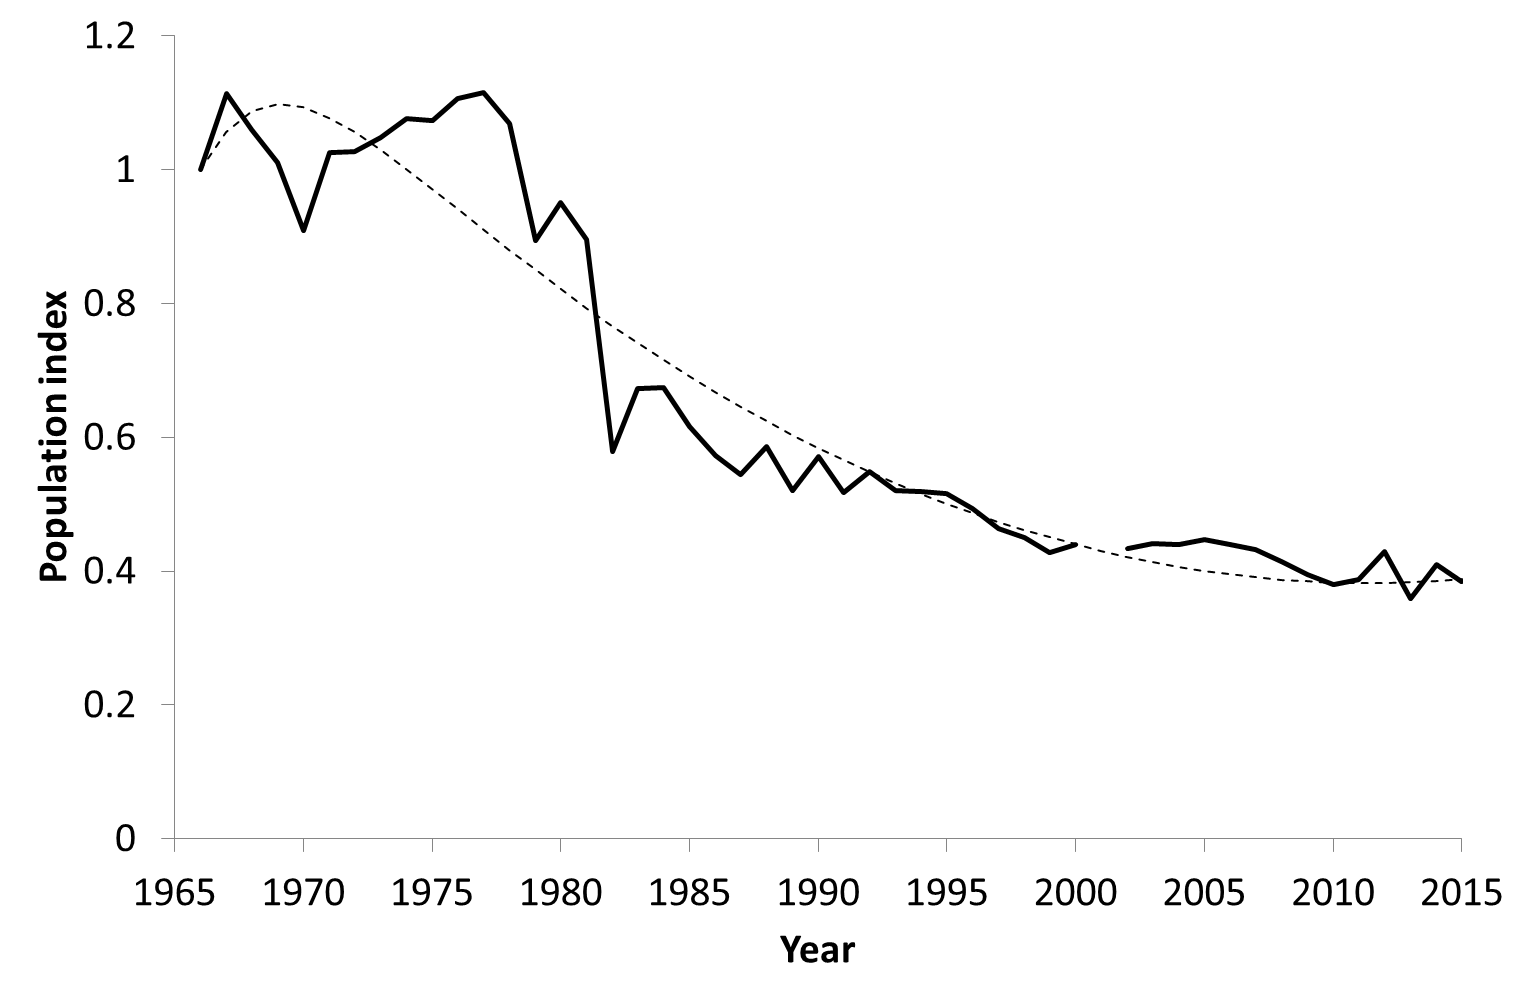


Song thrush


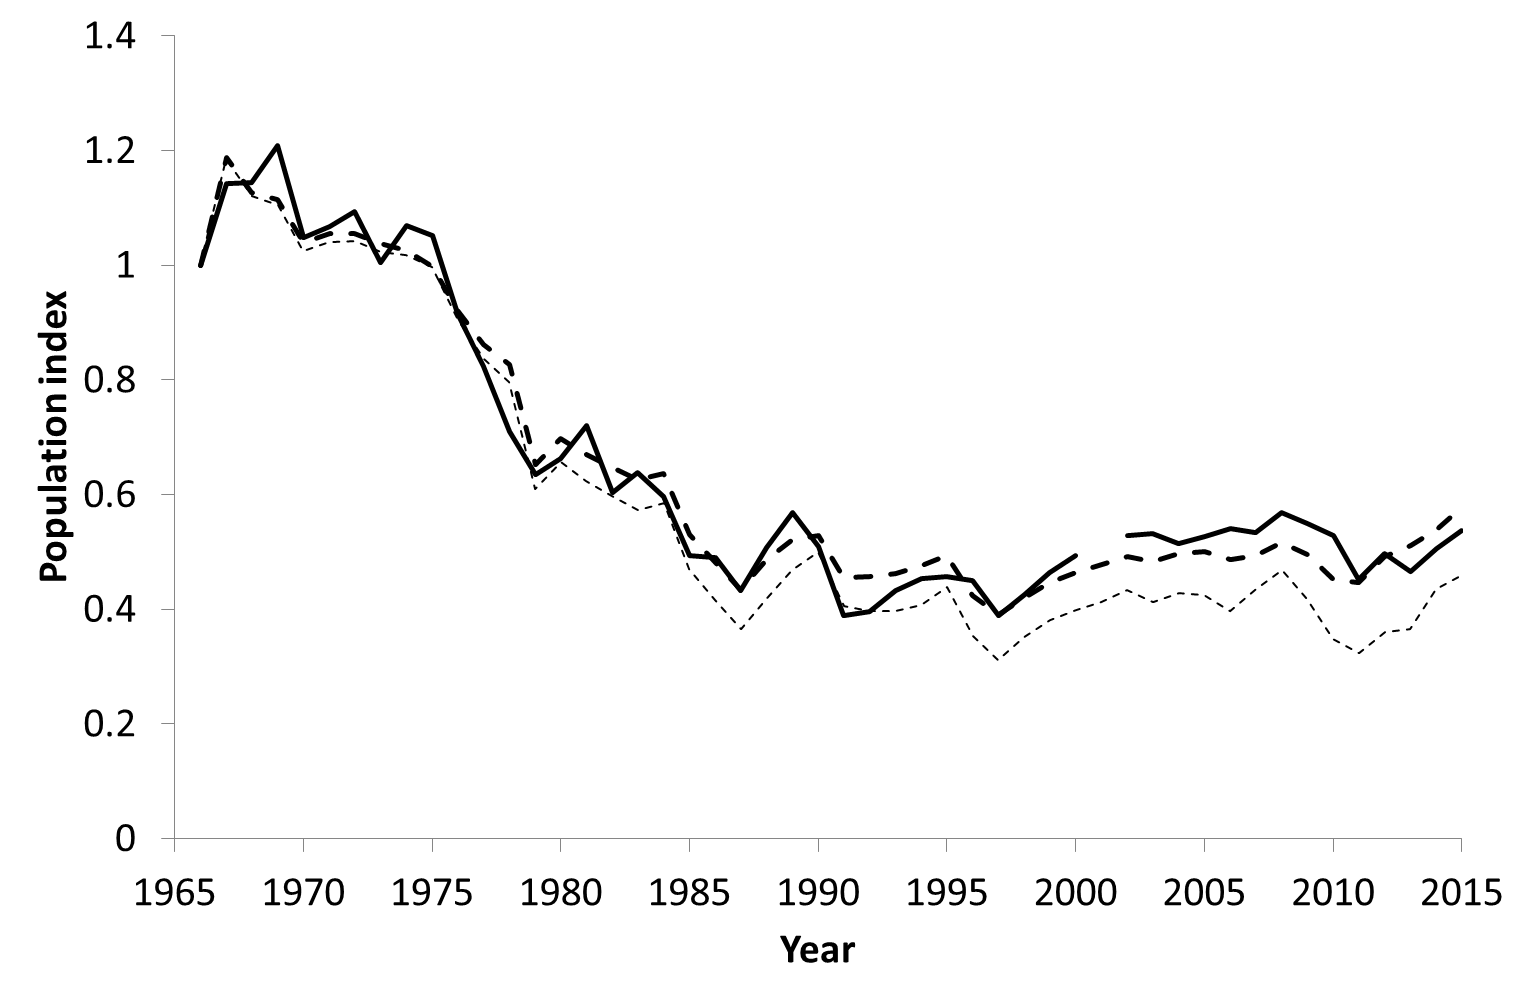


Spotted flycatcher


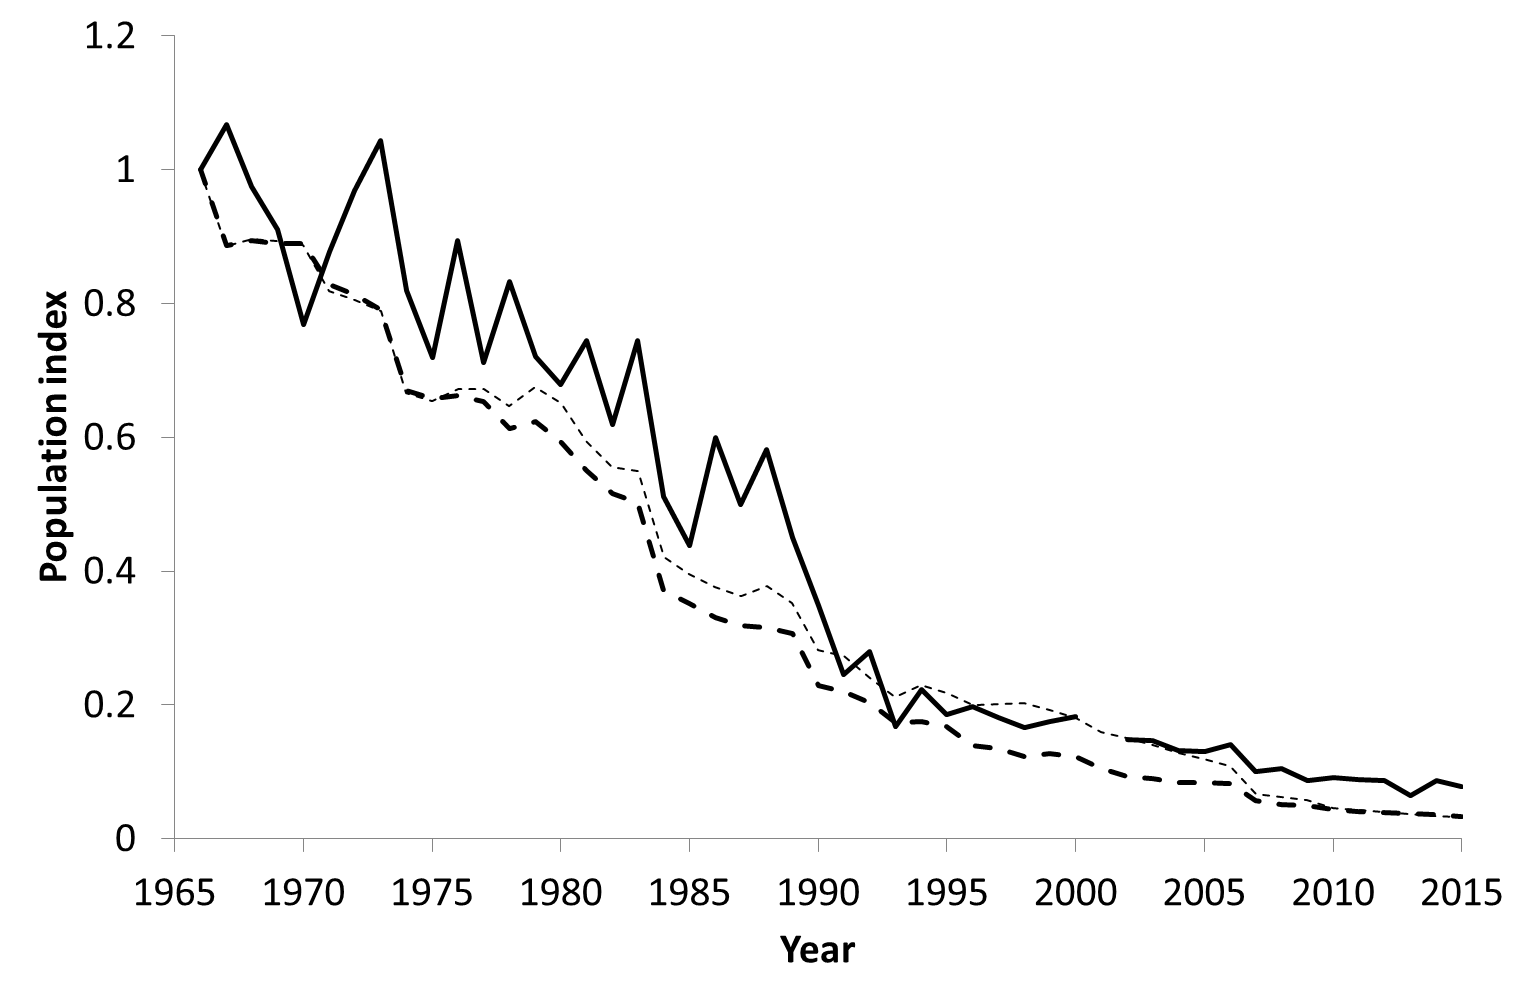


Starling


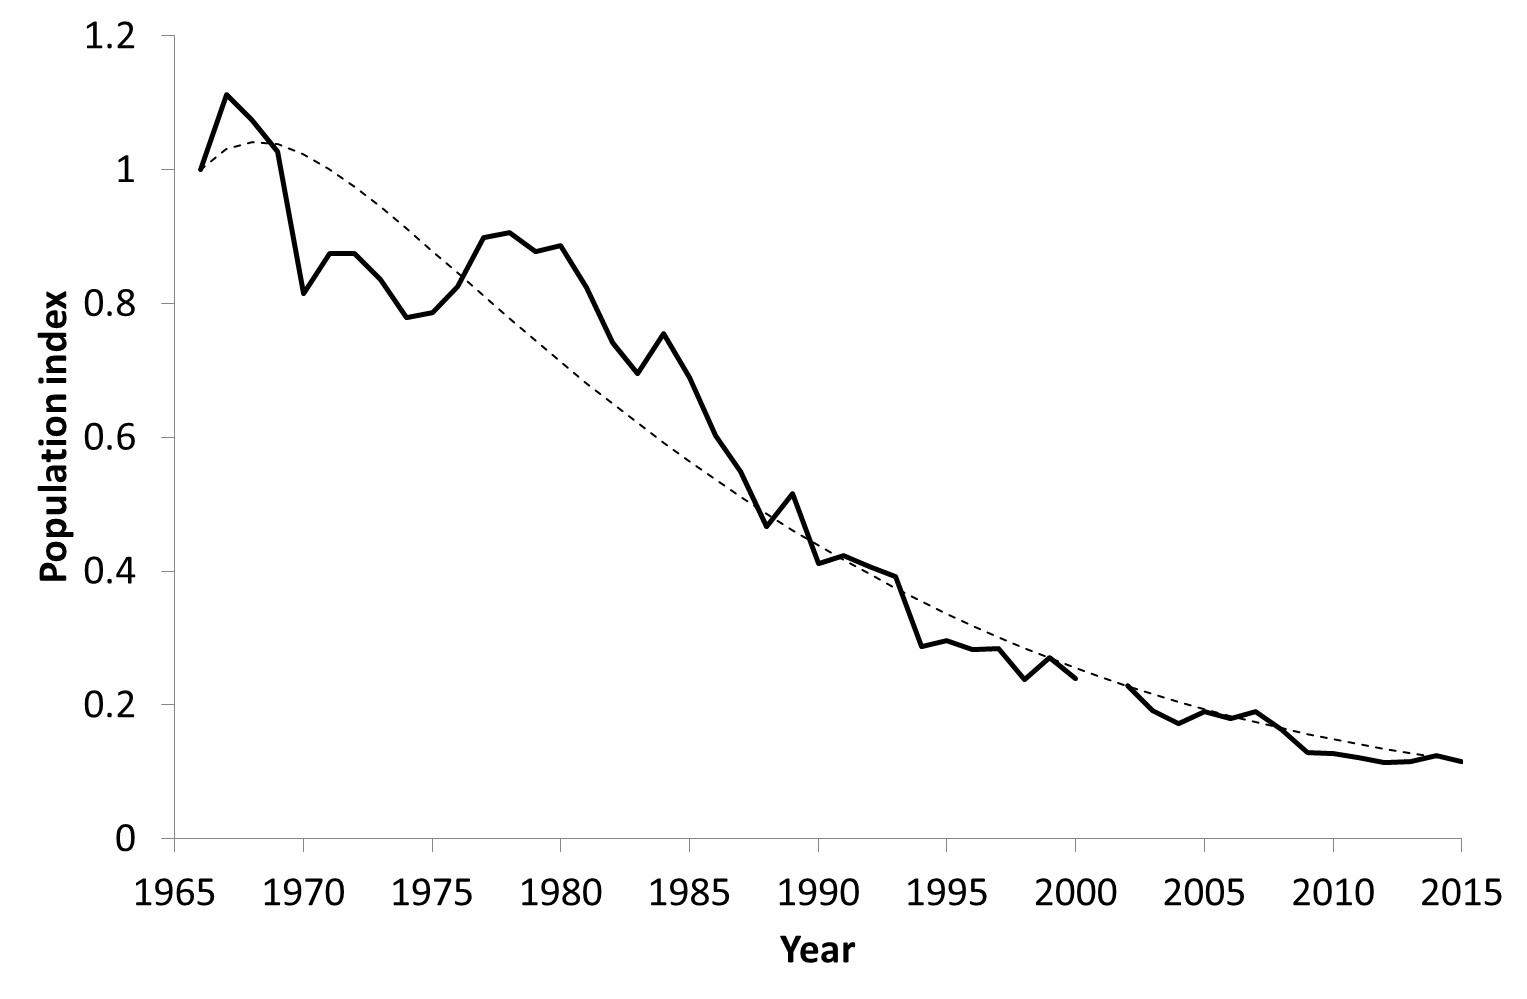


Stock dove


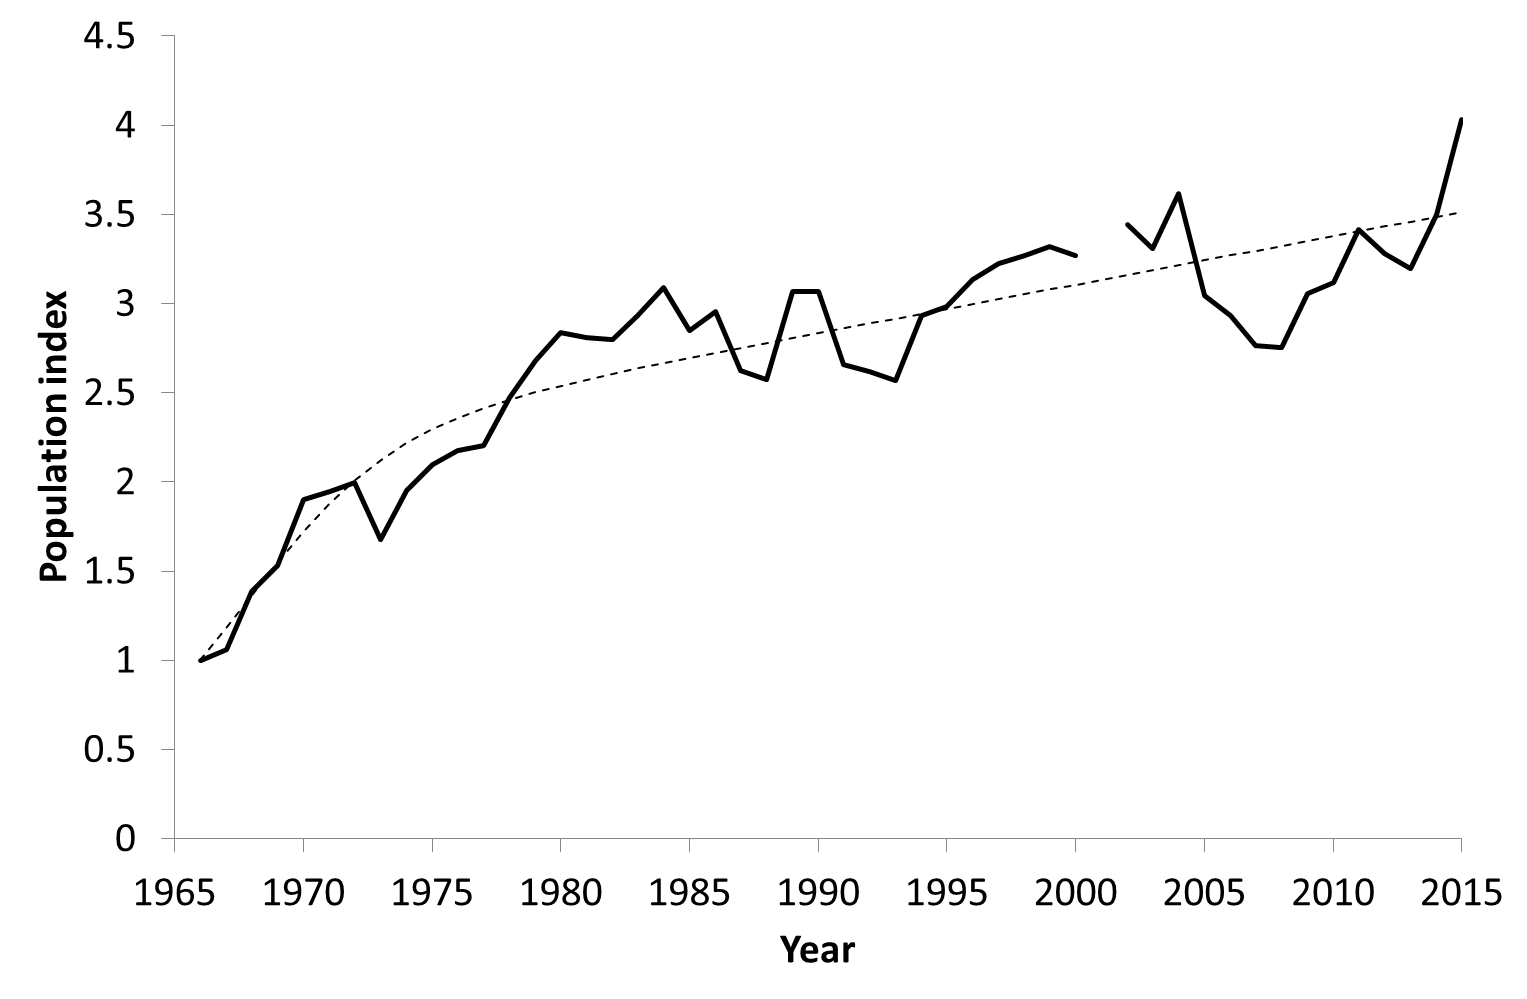


Swallow


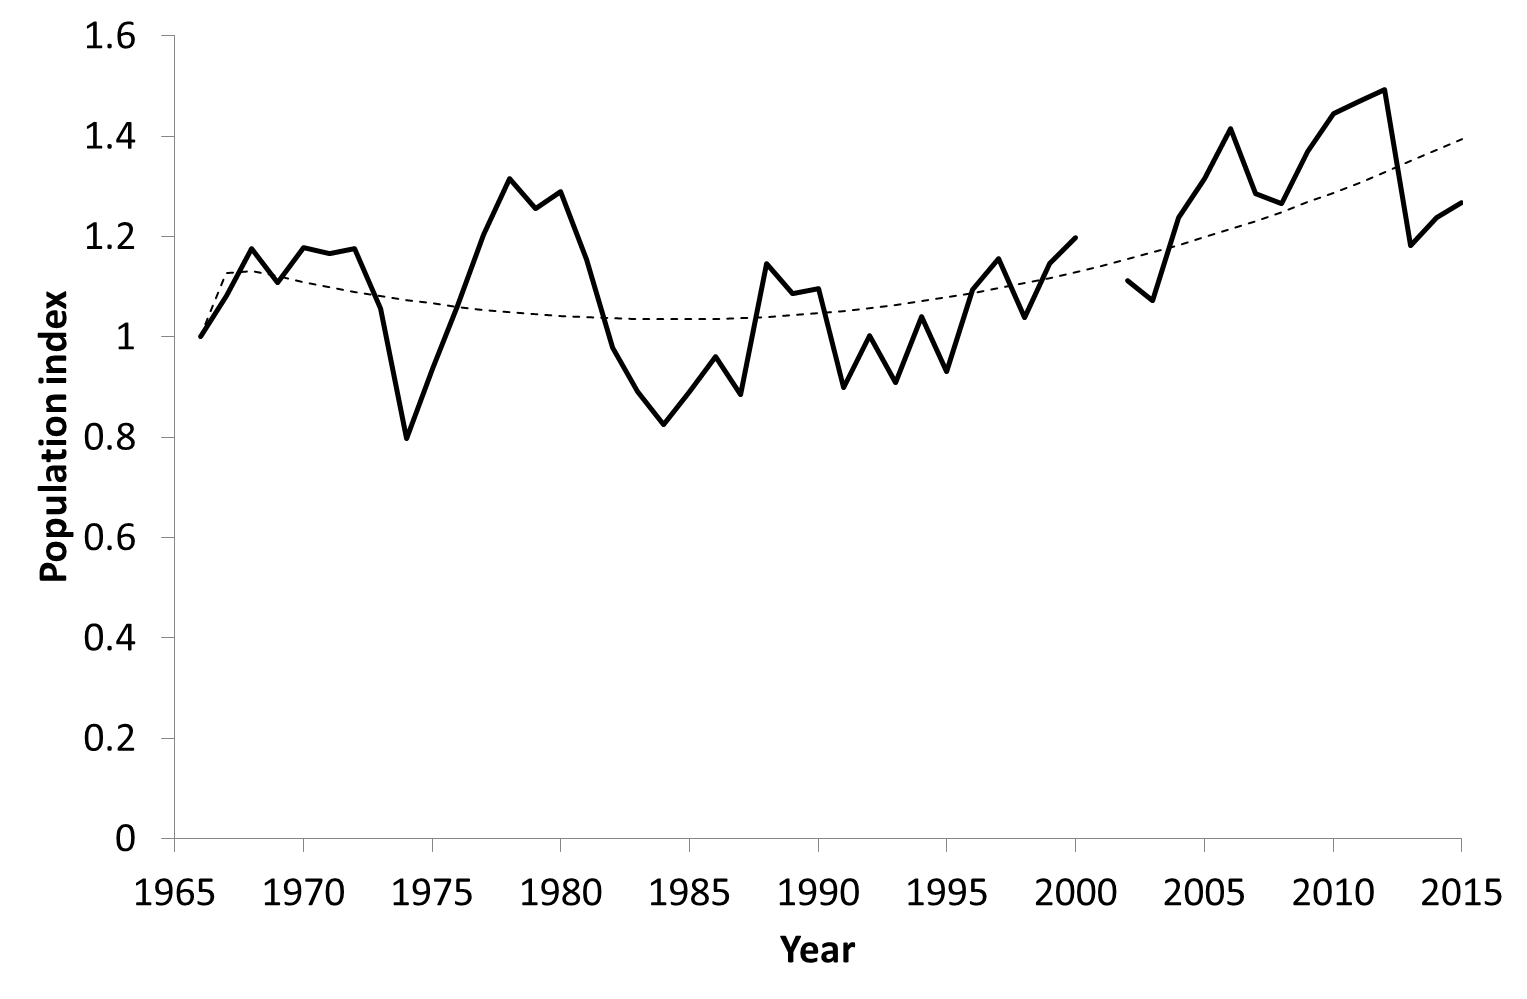


Tawny owl


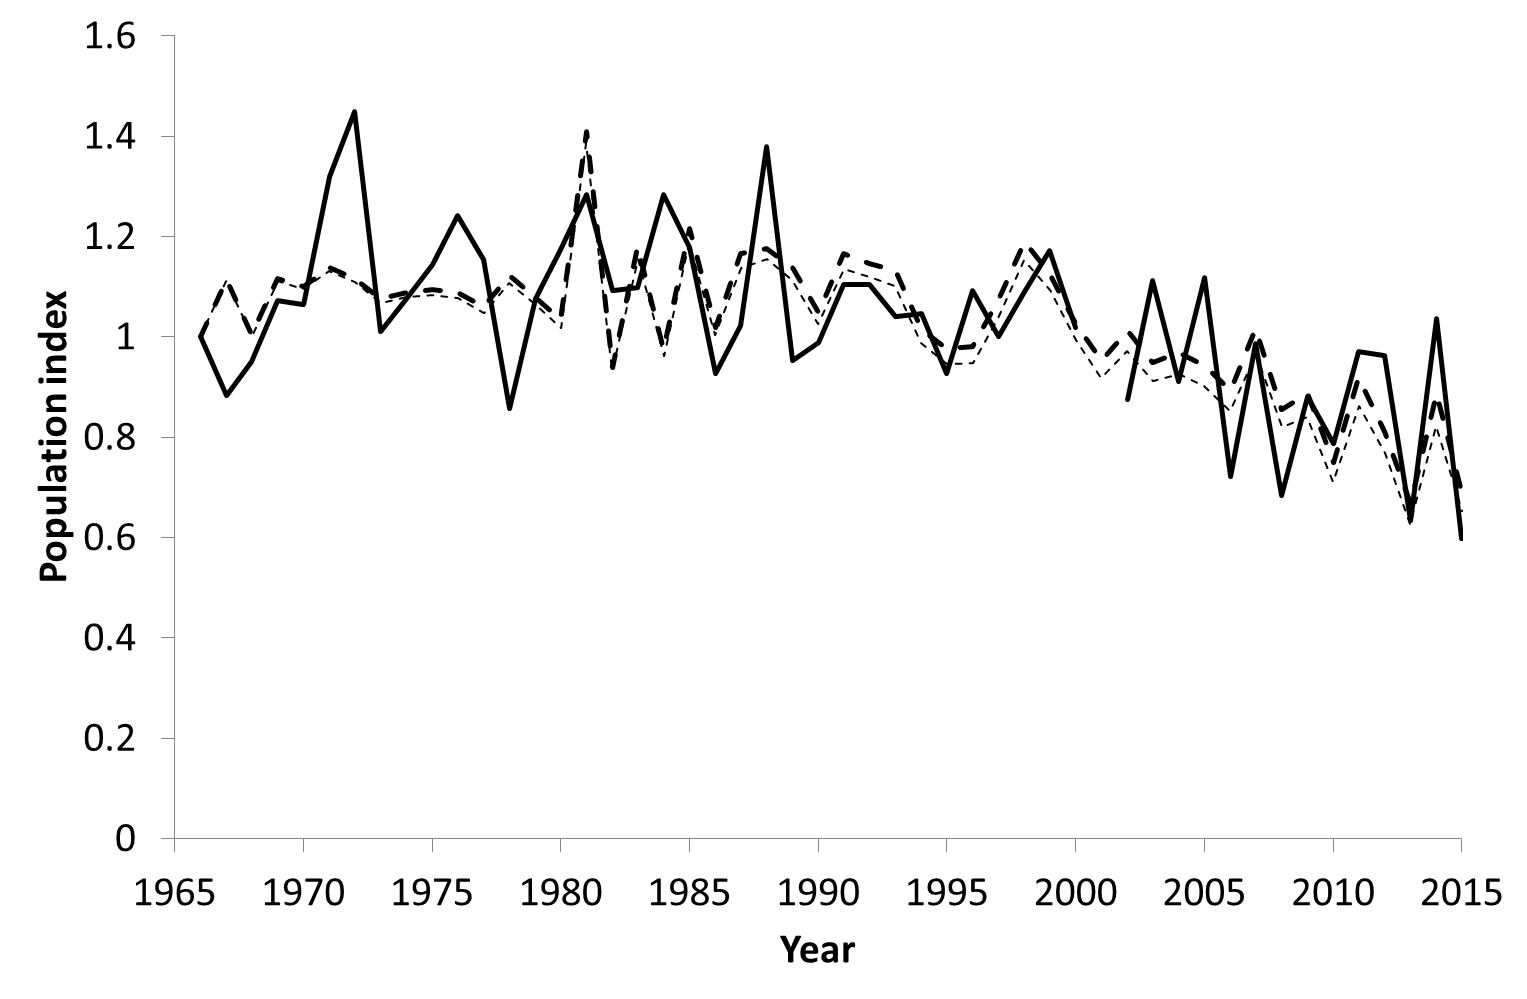


Treecreeper


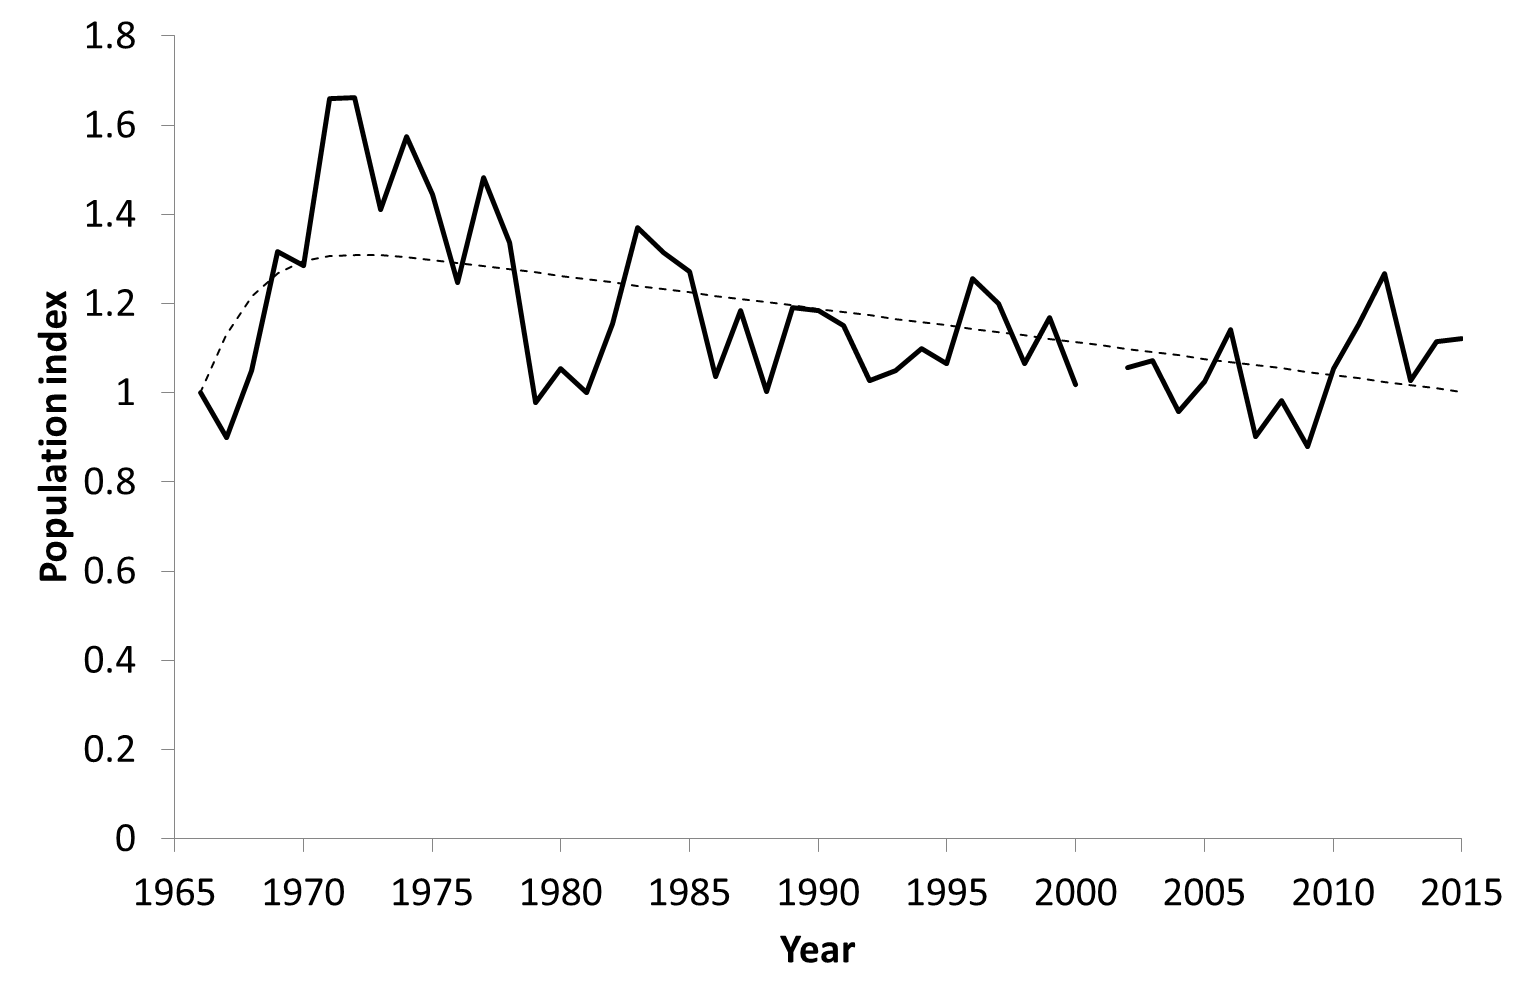


Tree pipit


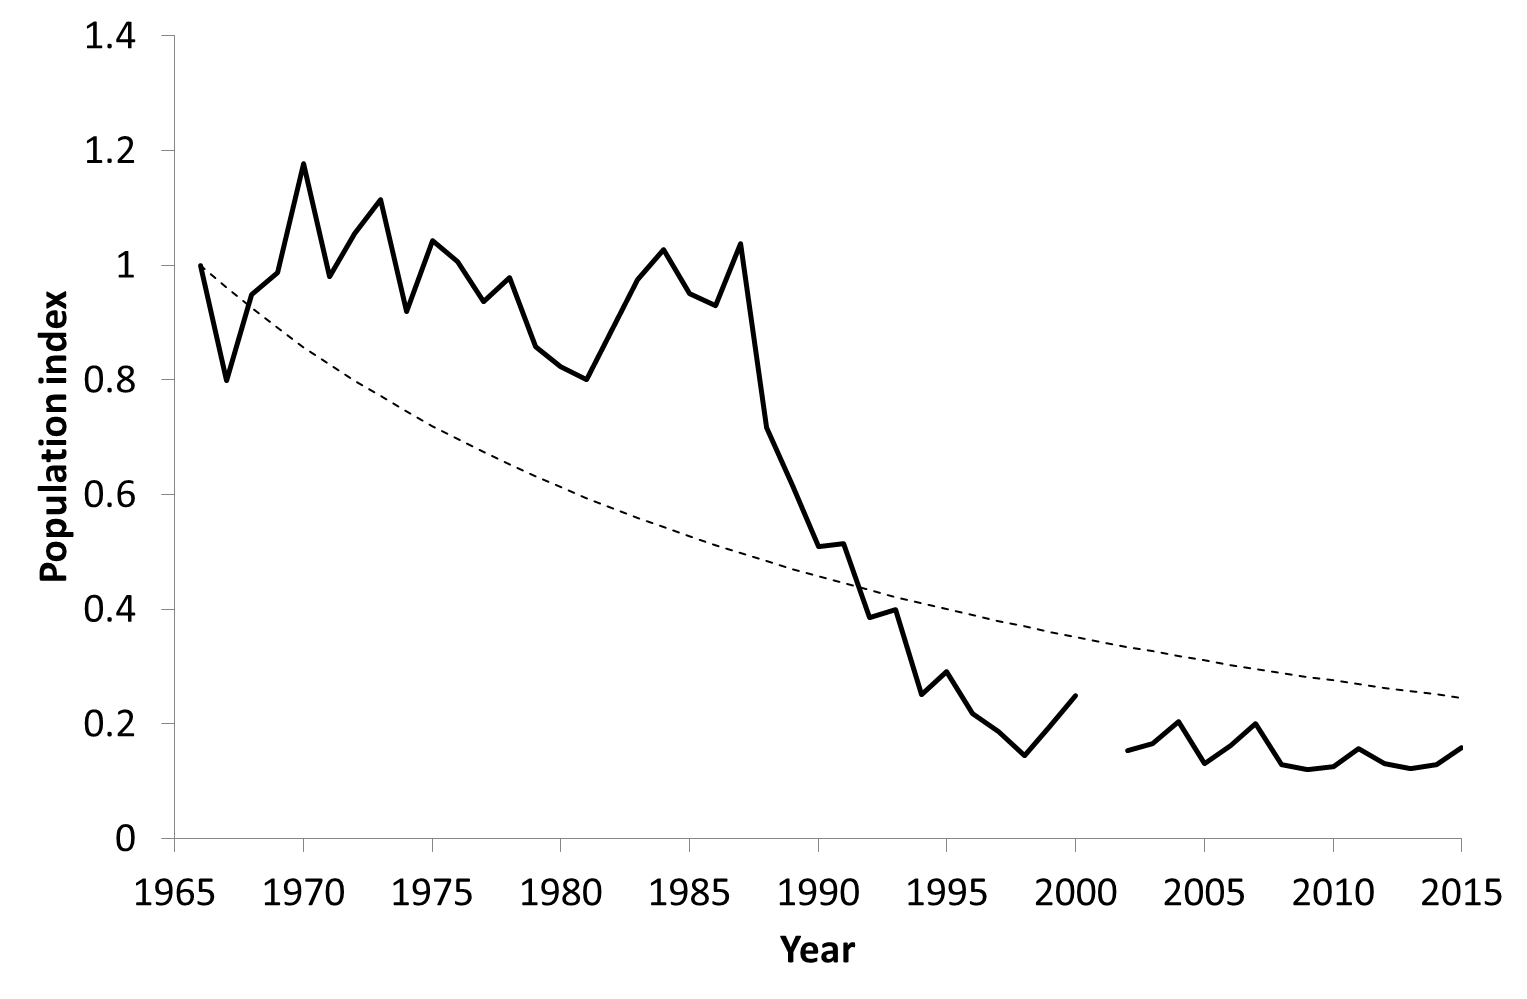


Tree sparrow


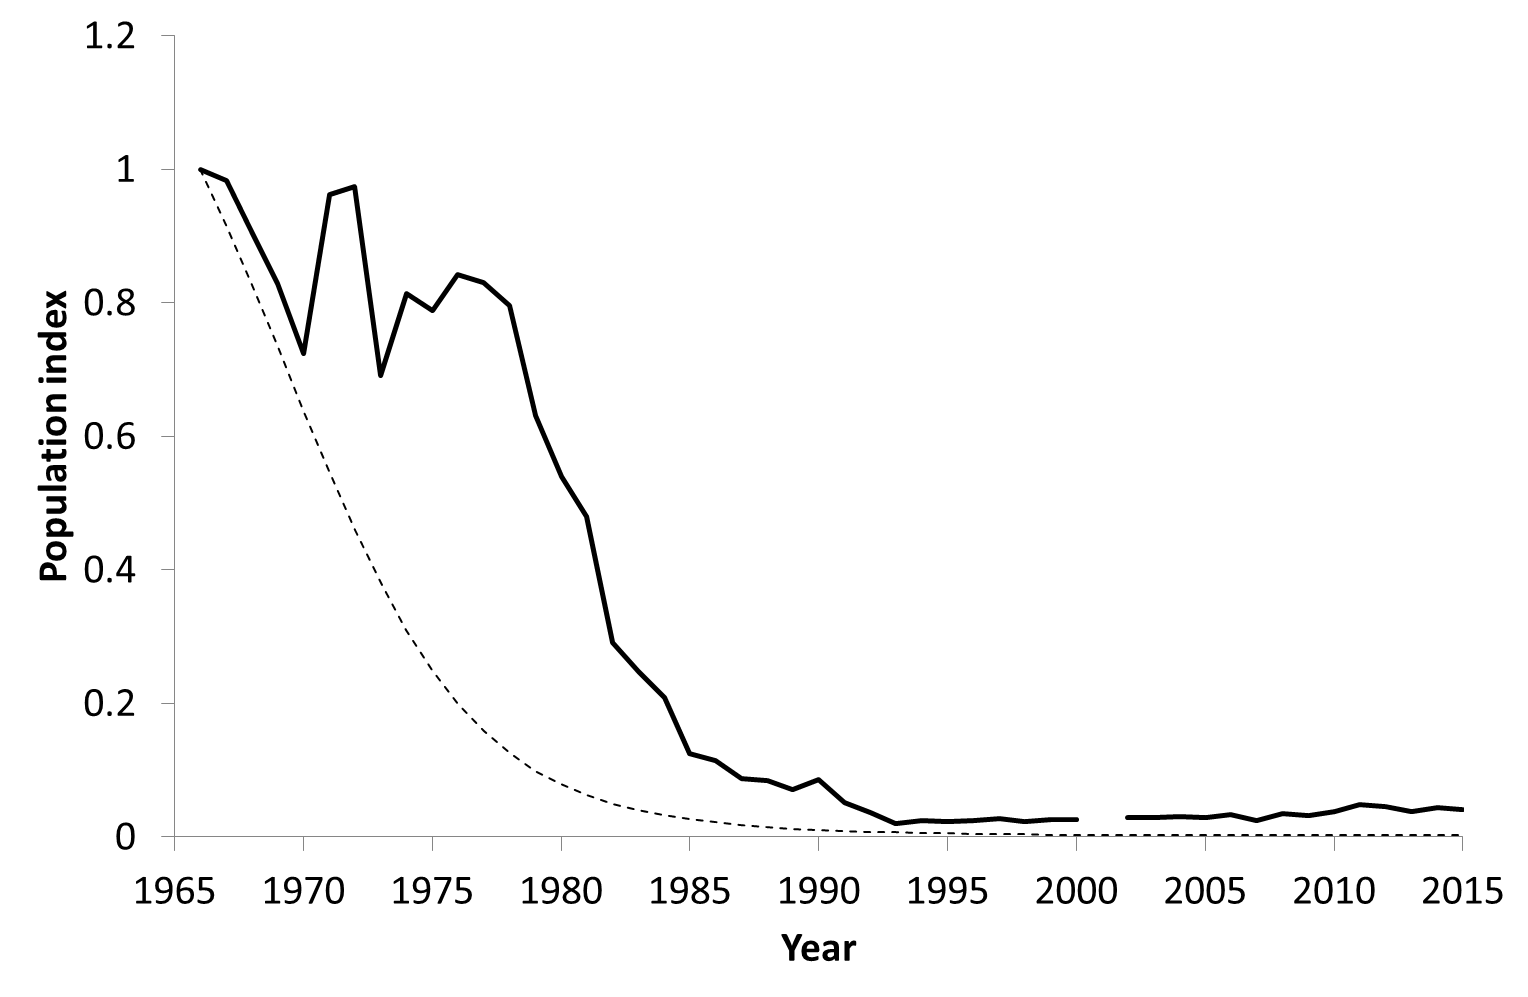


Turtle dove


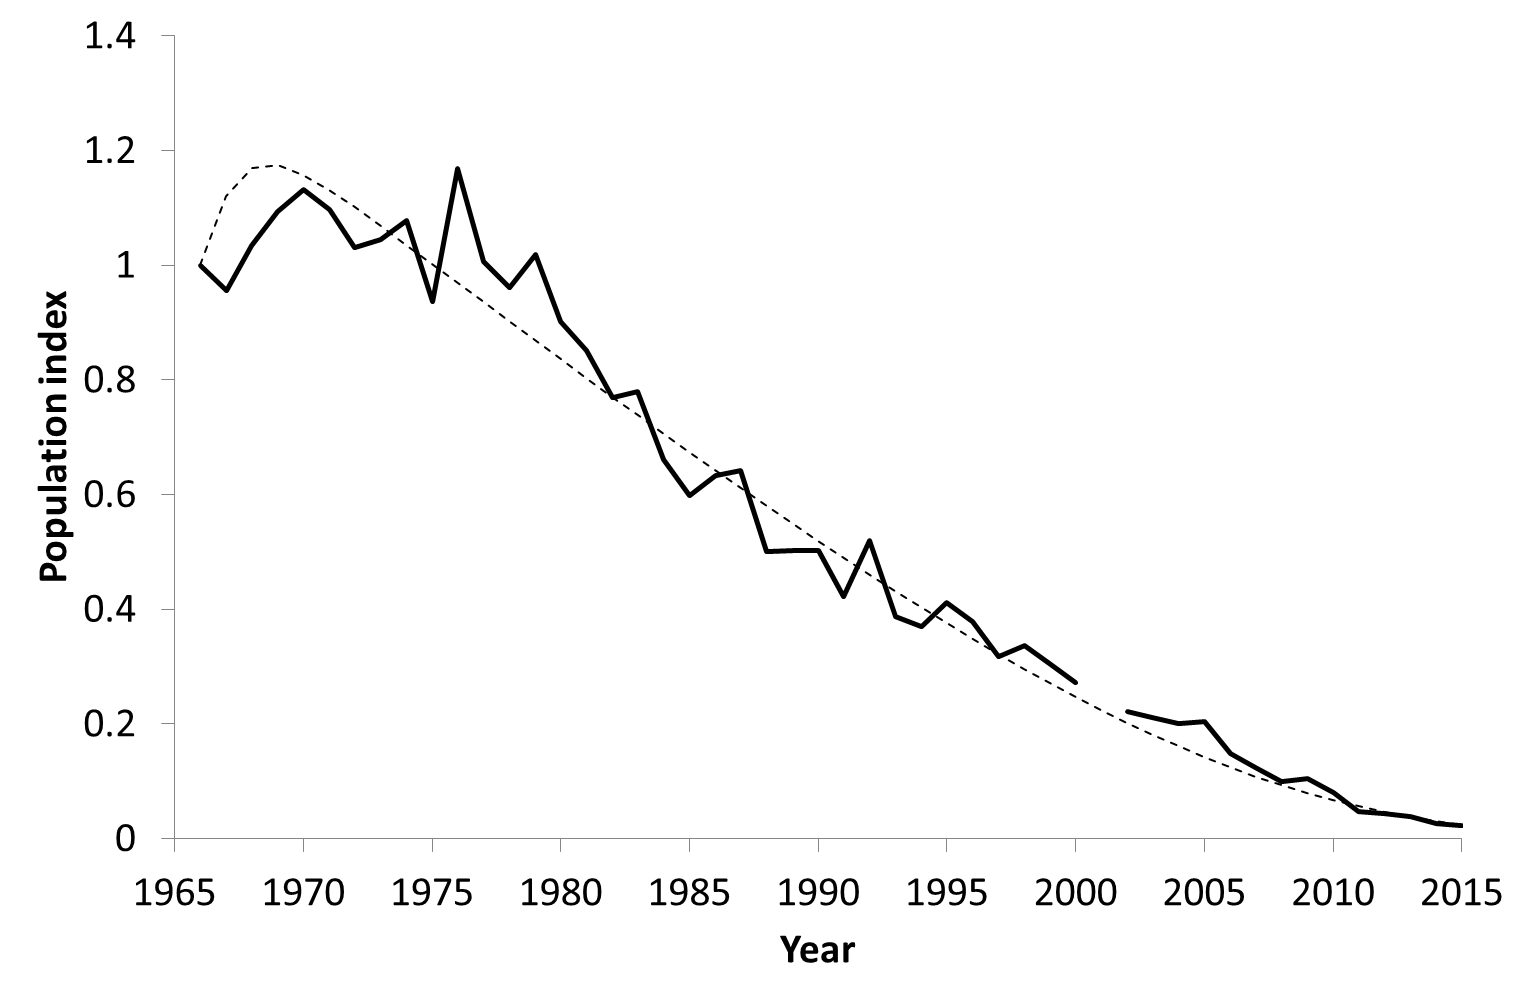


Whitethroat


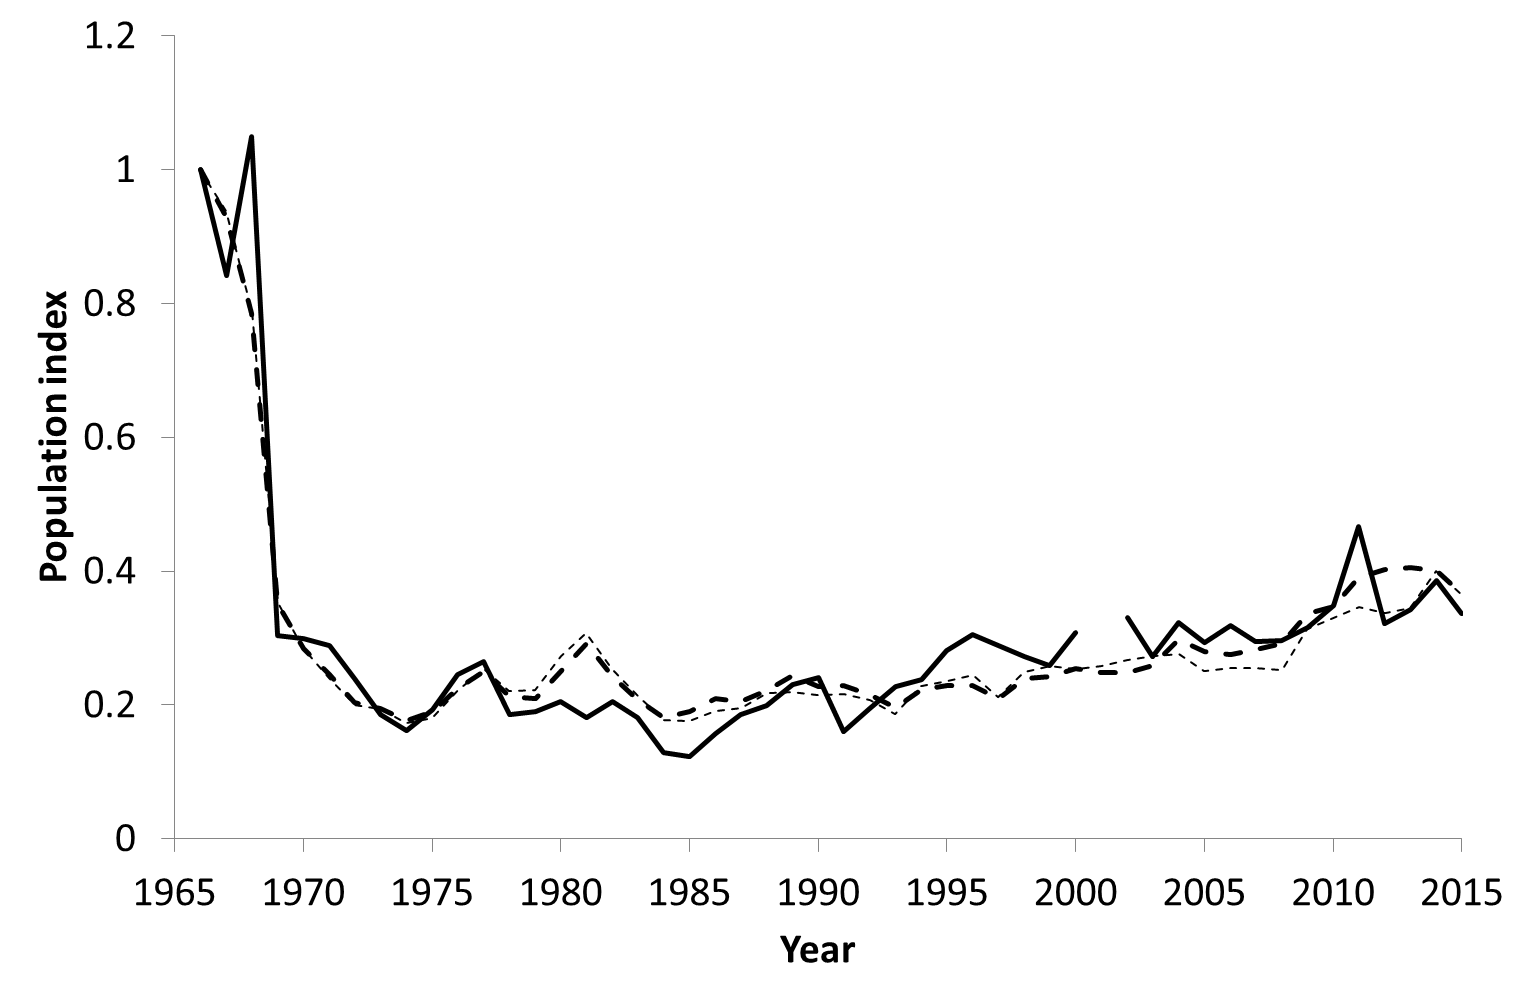


Willow tit


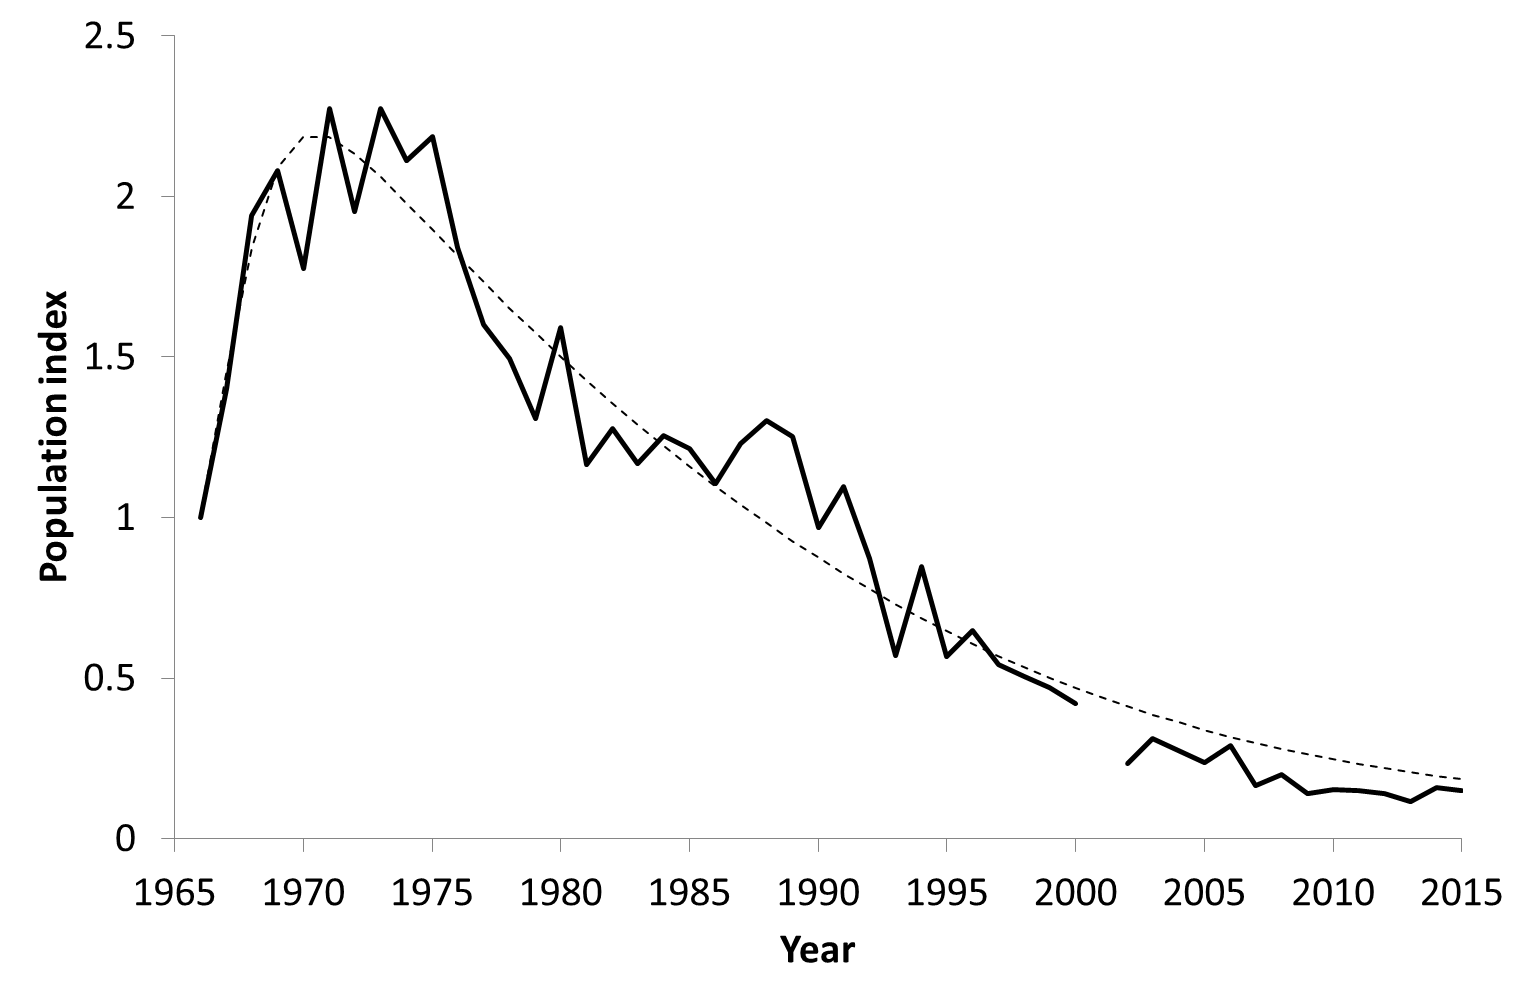


Willow warbler


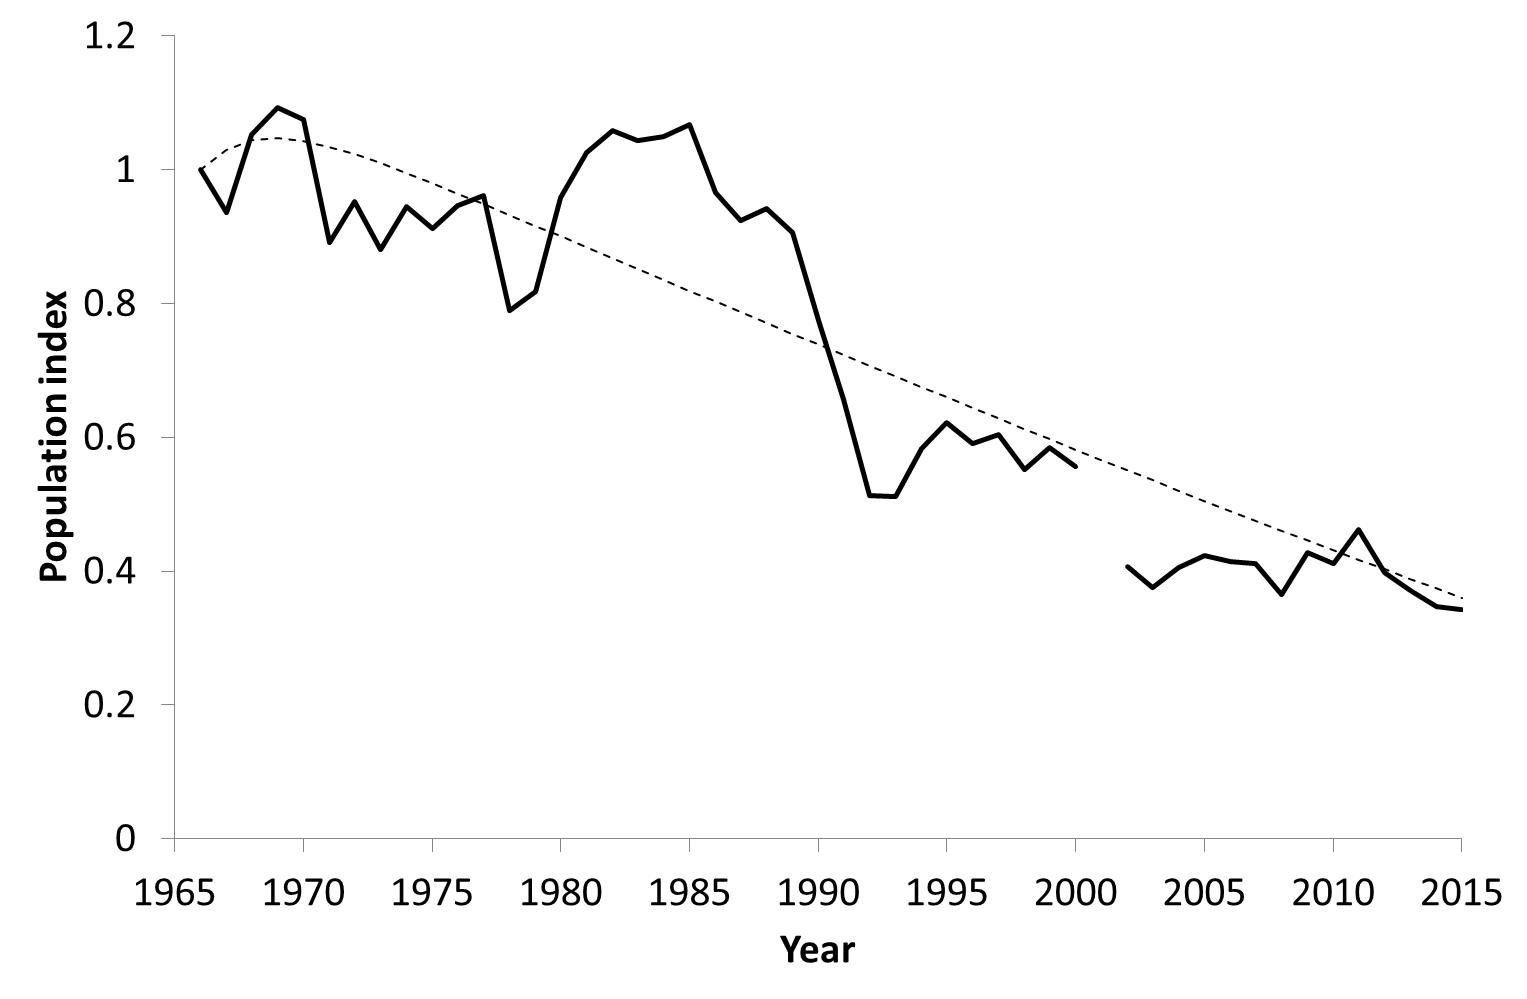


Wood pigeon


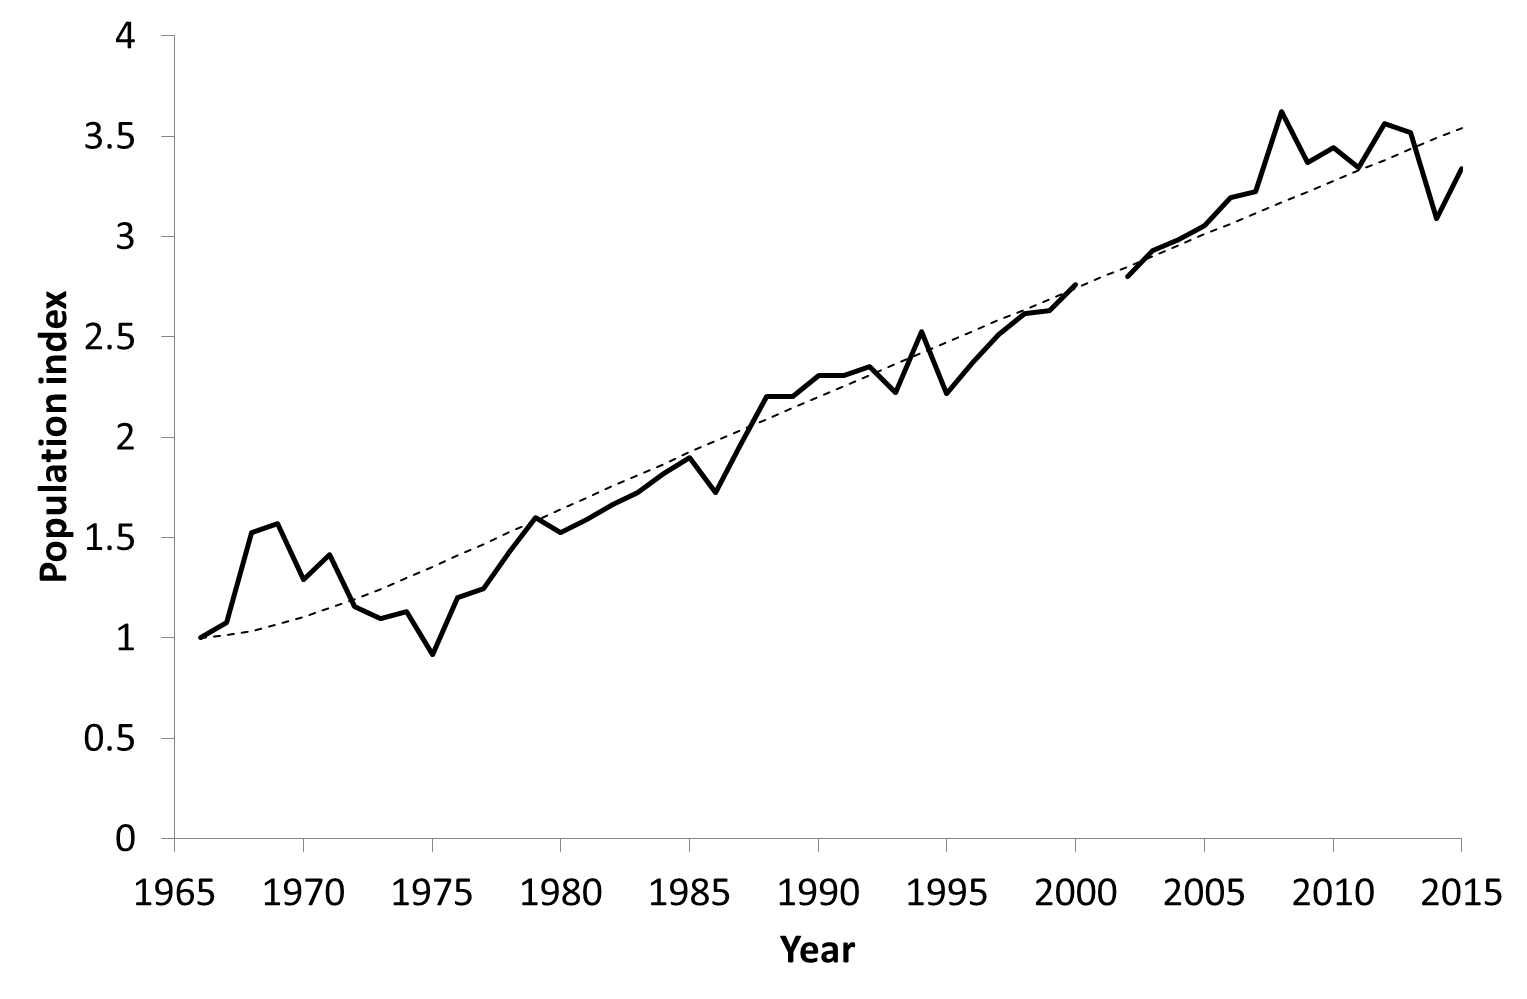


Wren


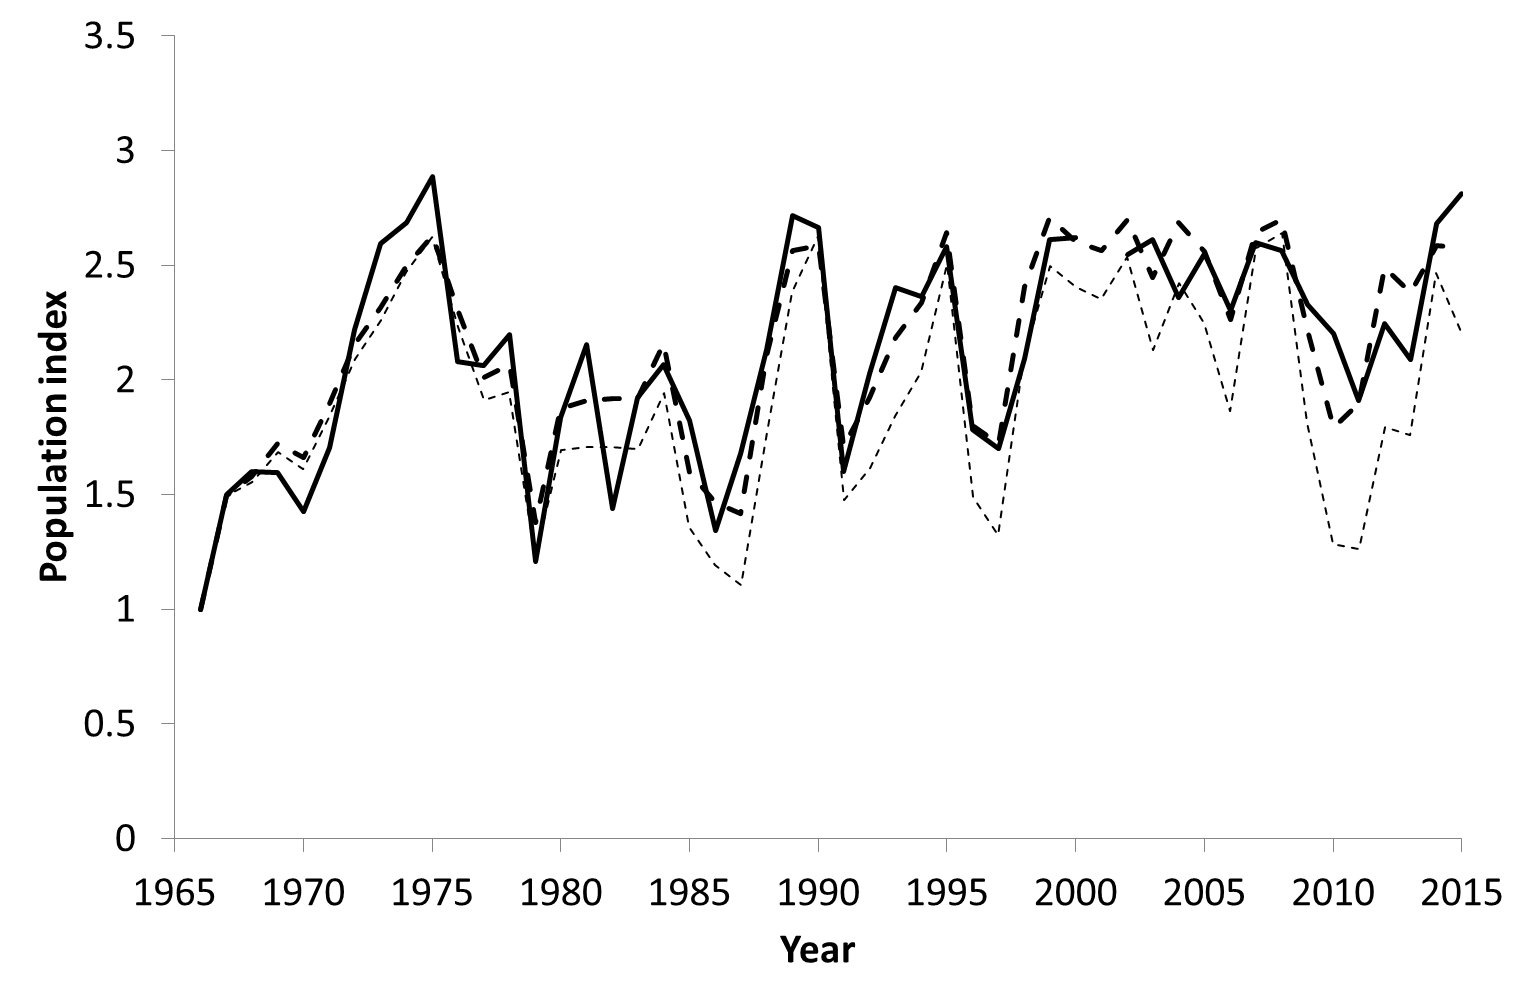


Yellowhammer


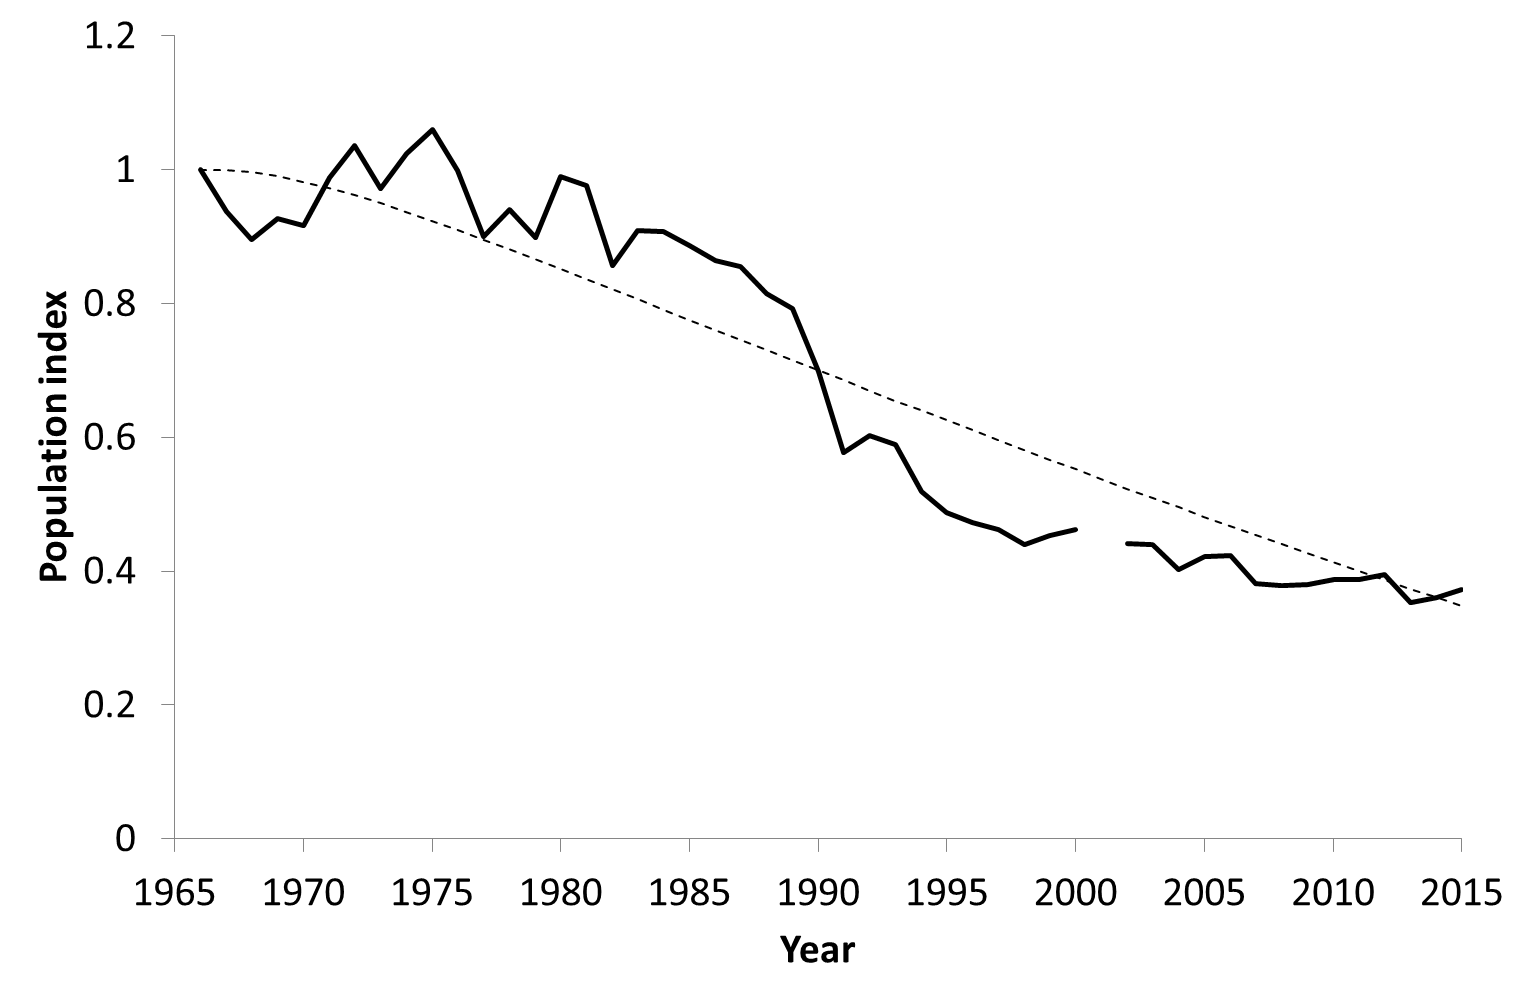


Yellow wagtail


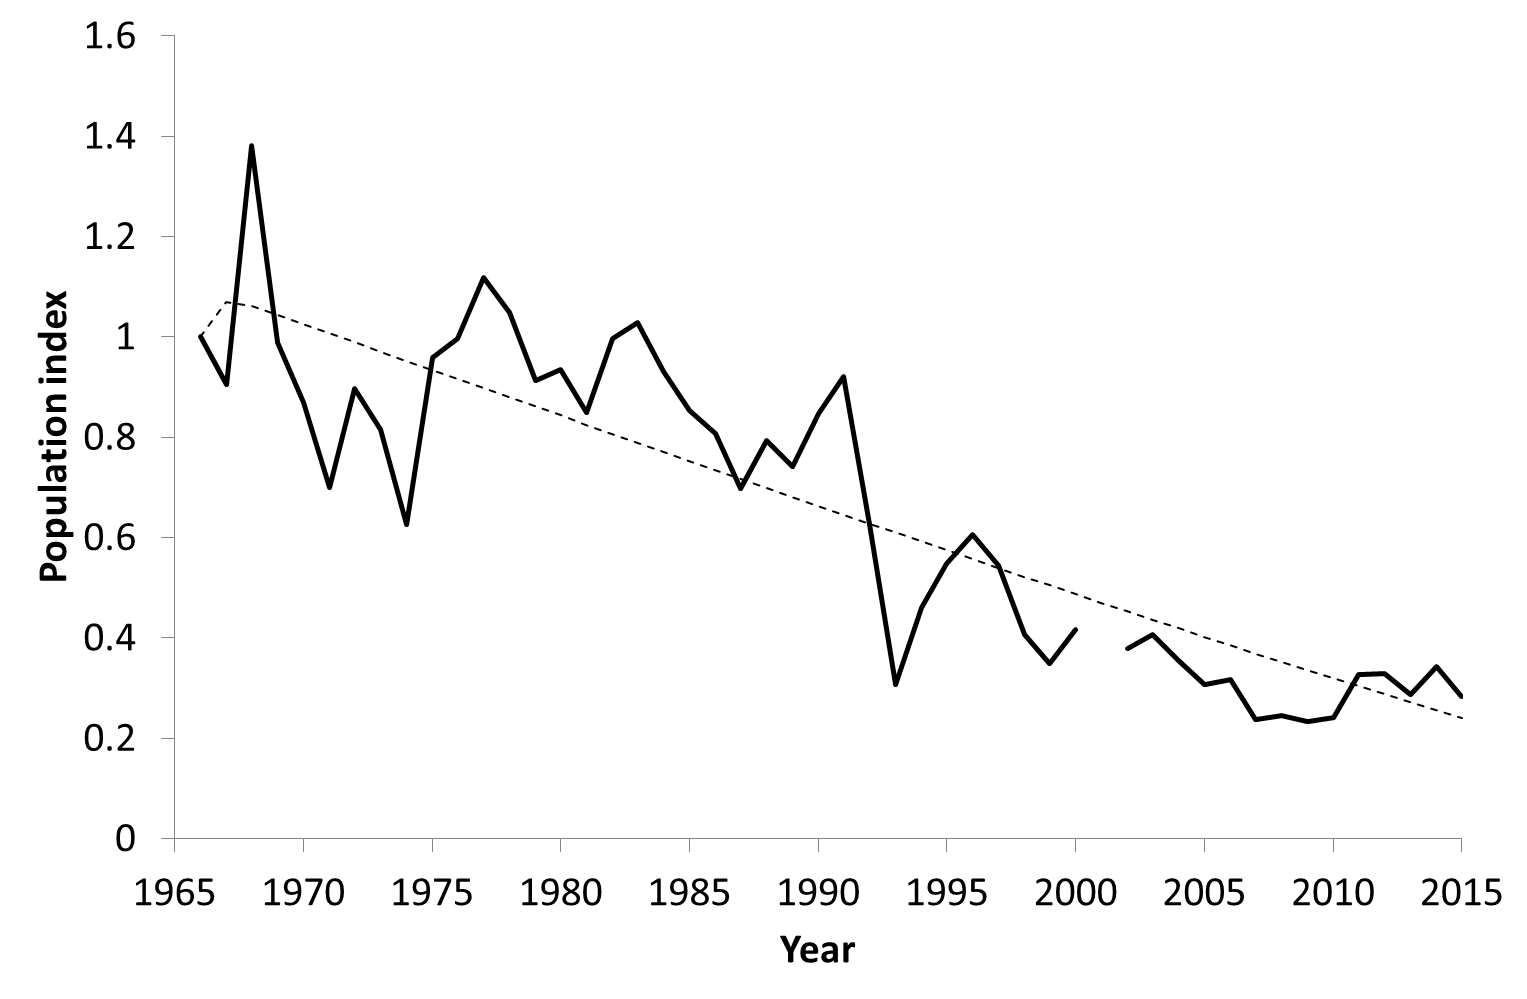


**Figure S1.** Observed (thick line), and modelled trend based on observed climate variables (*Mc* - dashed line) and detrended climate data (*Md* - dotted line), for 68 breeding bird species across England. Models for species with no significant climatic predictors just show the observed and a single modelled line, based on relationships between year and population growth rate. There is no observed data for 2001, when access restrictions to the English countryside in response to the foot-and-mouth disease outbreak prevented data collection.
